# Supplementary material for: MHCVision: estimation of global and local false discovery rate for MHC class I peptide binding prediction
Source: Bioinformatics. 2021 Jul 1;37(21):3830–8. doi: 10.1093/bioinformatics/btab479 (PMC8570816; doi:10.1093/bioinformatics/btab479)

# HLA-A0101

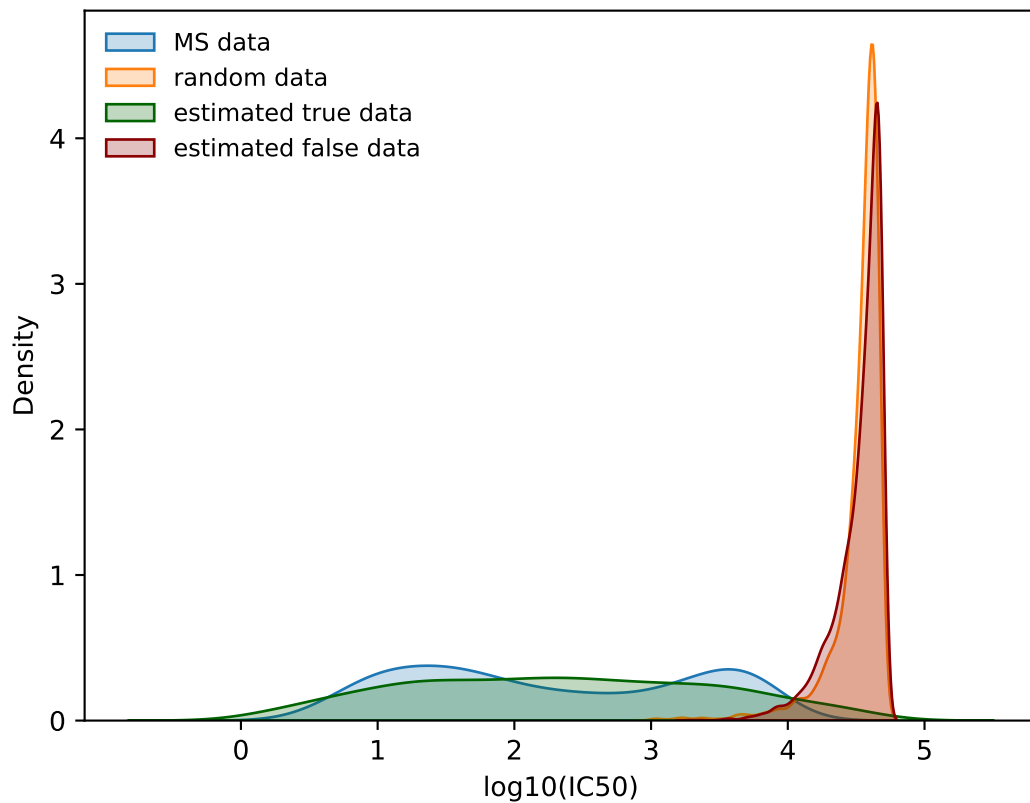

# HLA-A0201

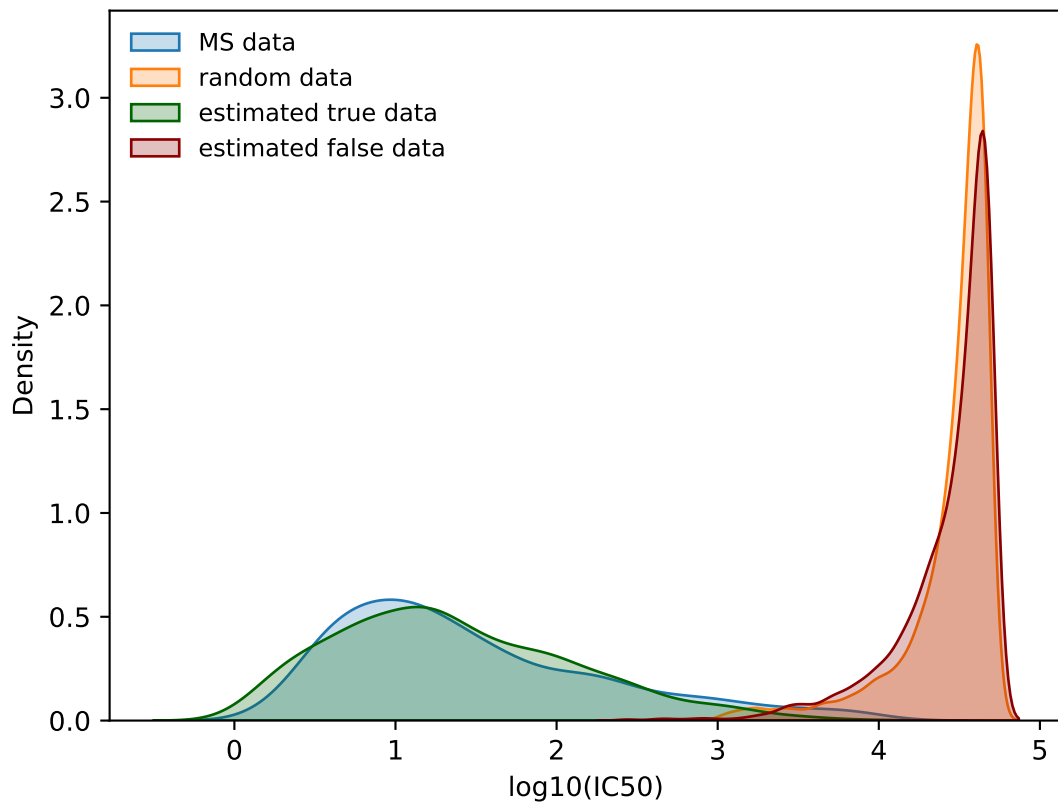

## HLA-A0202

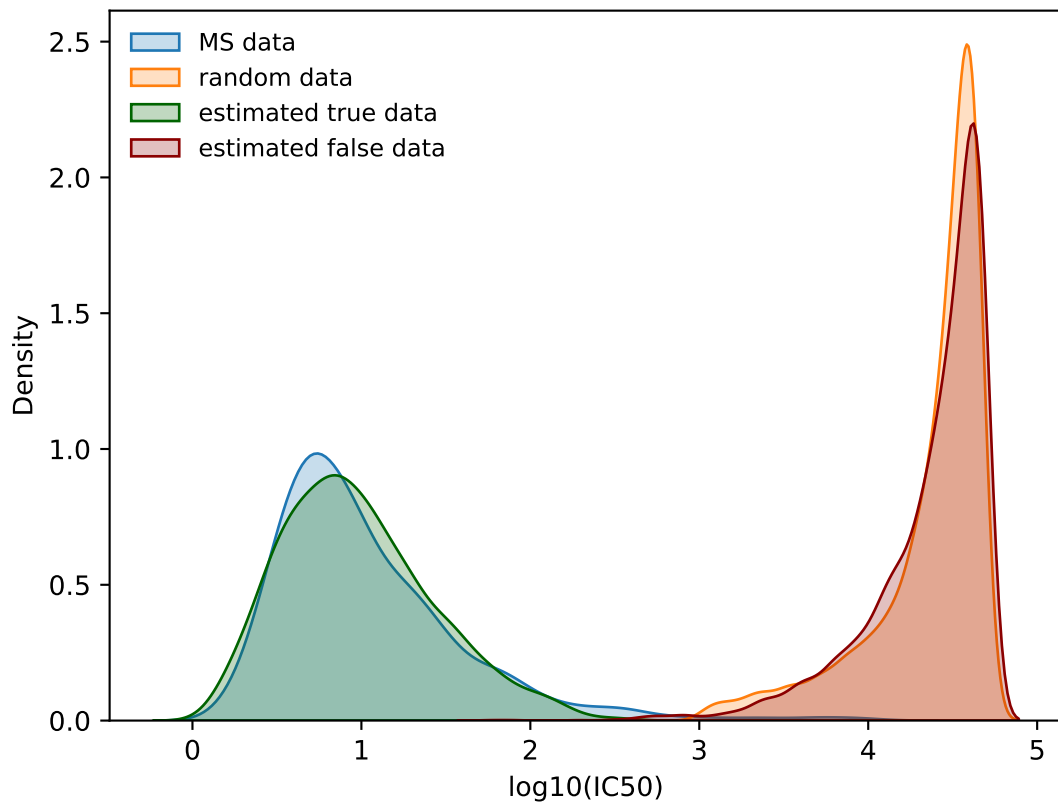

## HLA-A0203

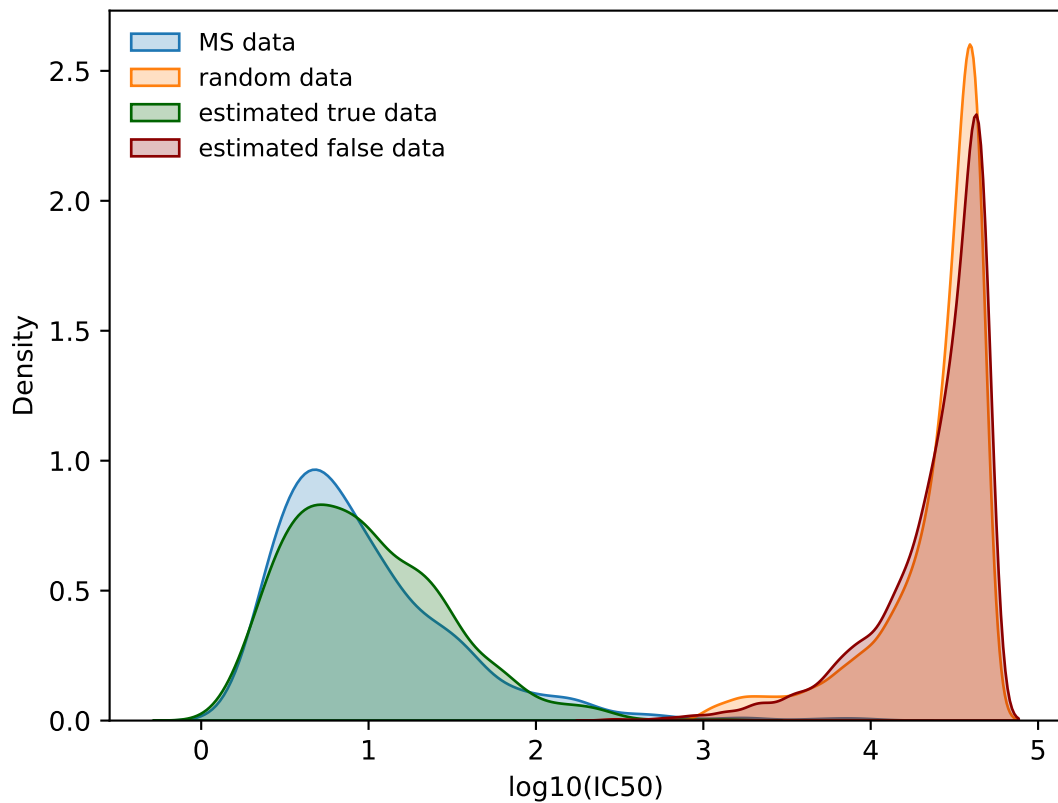

## HLA-A0204

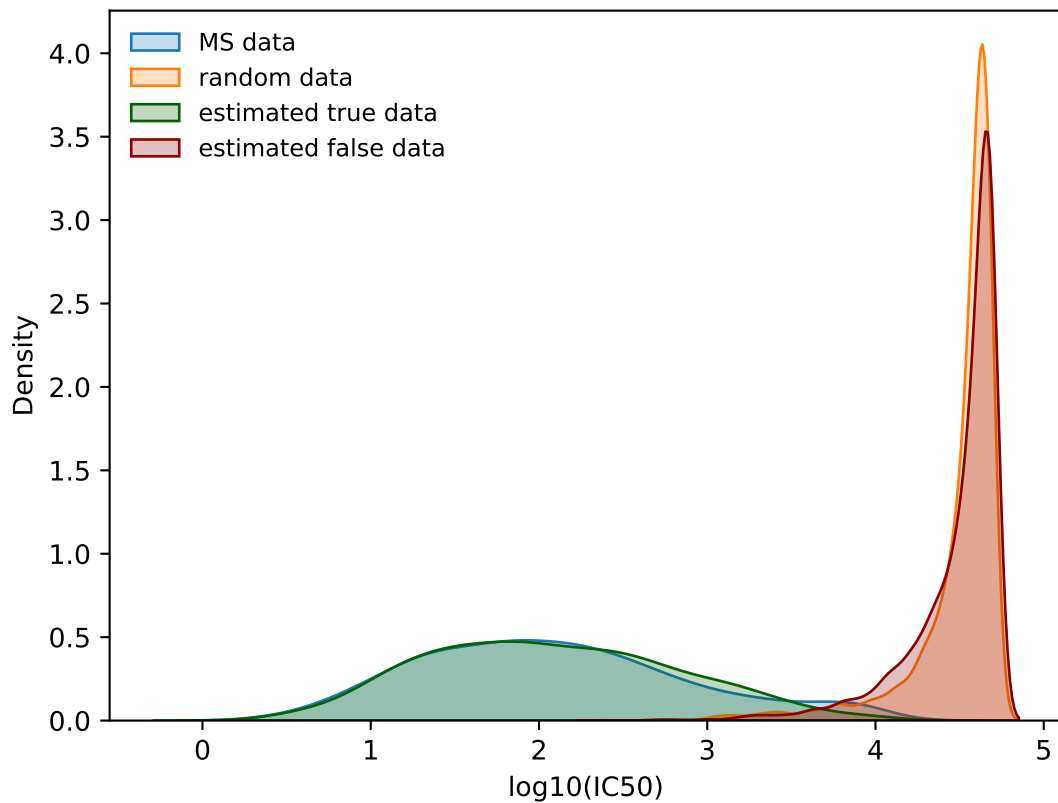

## HLA-A0205

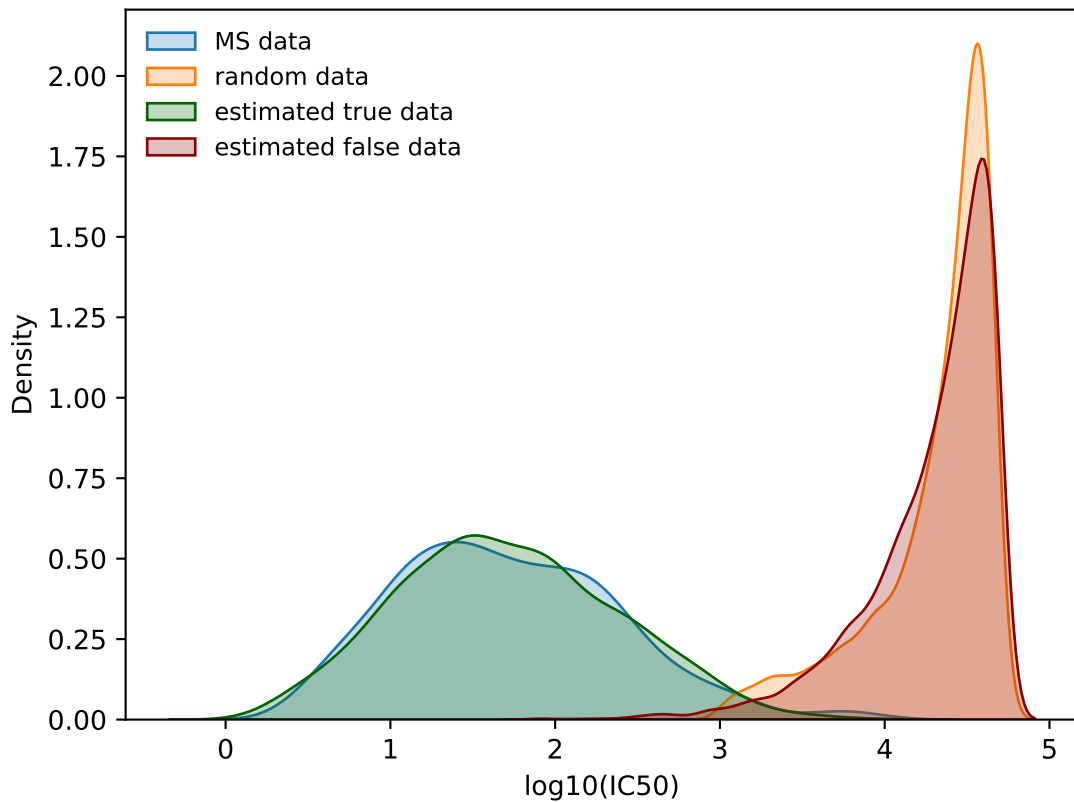

# HLA-A0206

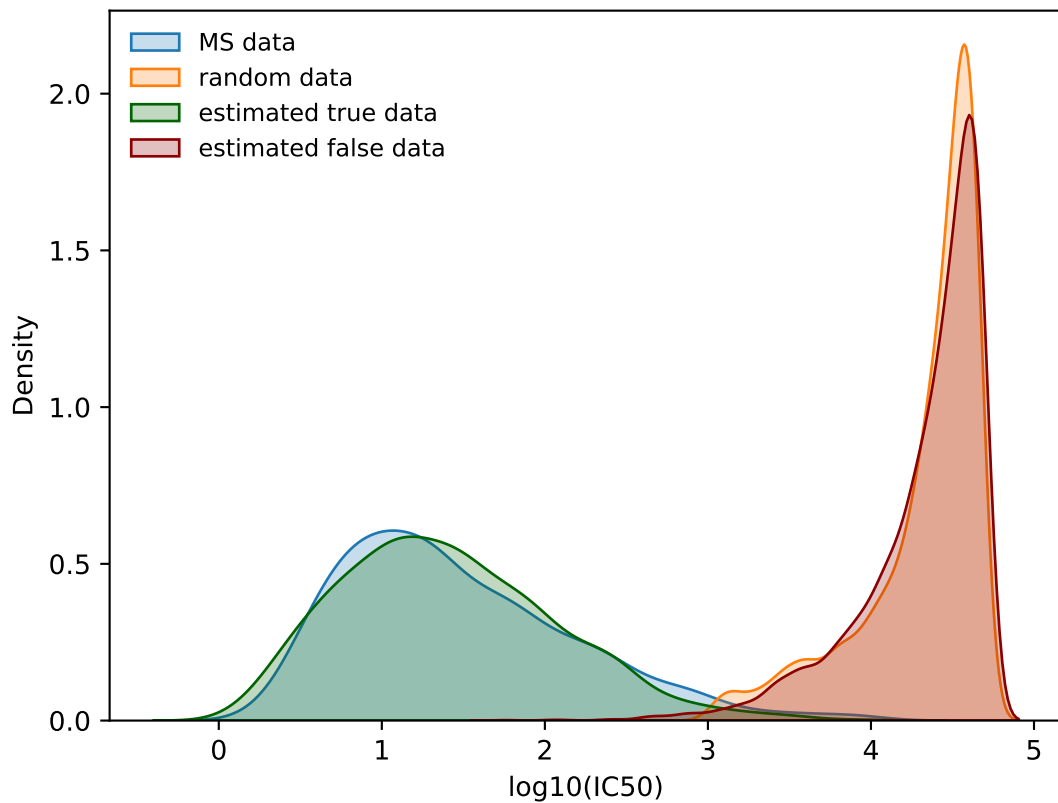

## HLA-A0207

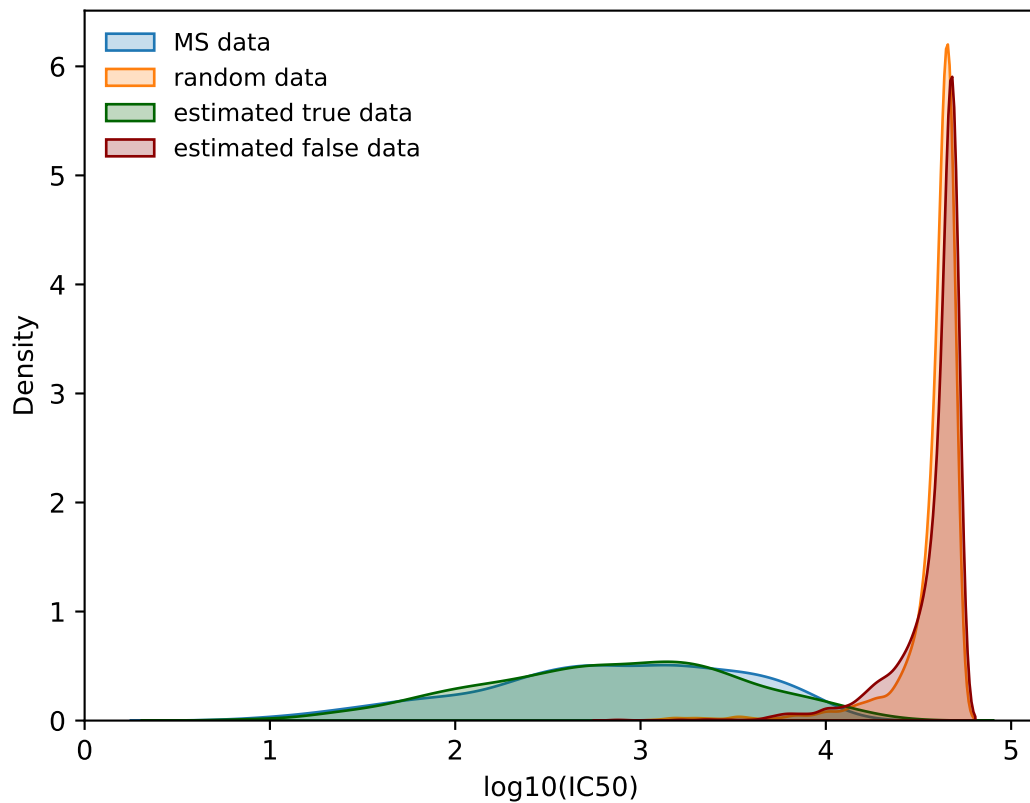

# HLA-A0211

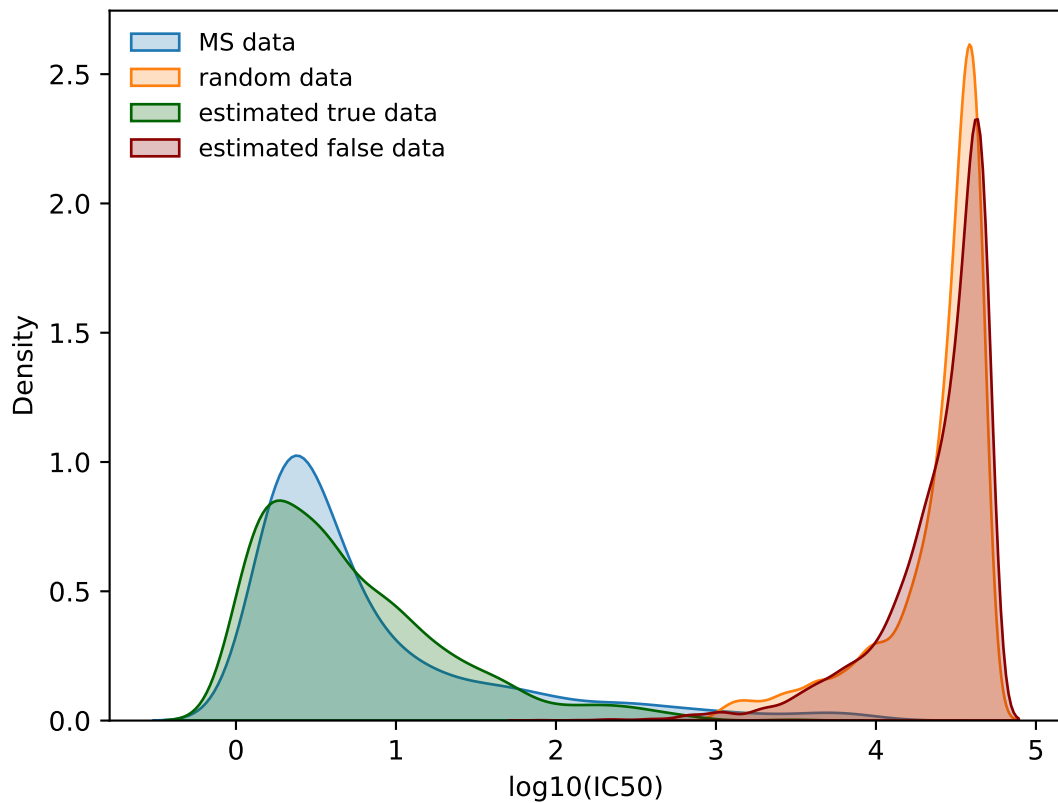

# HLA-A0301

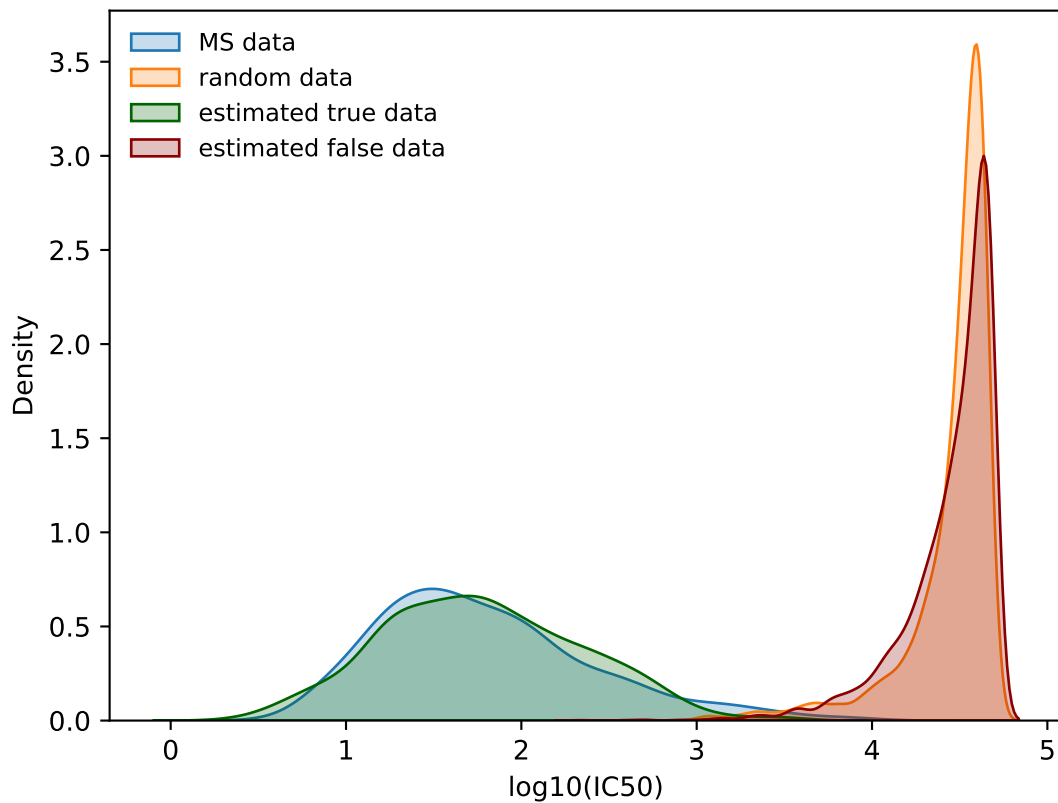

# HLA-A1101

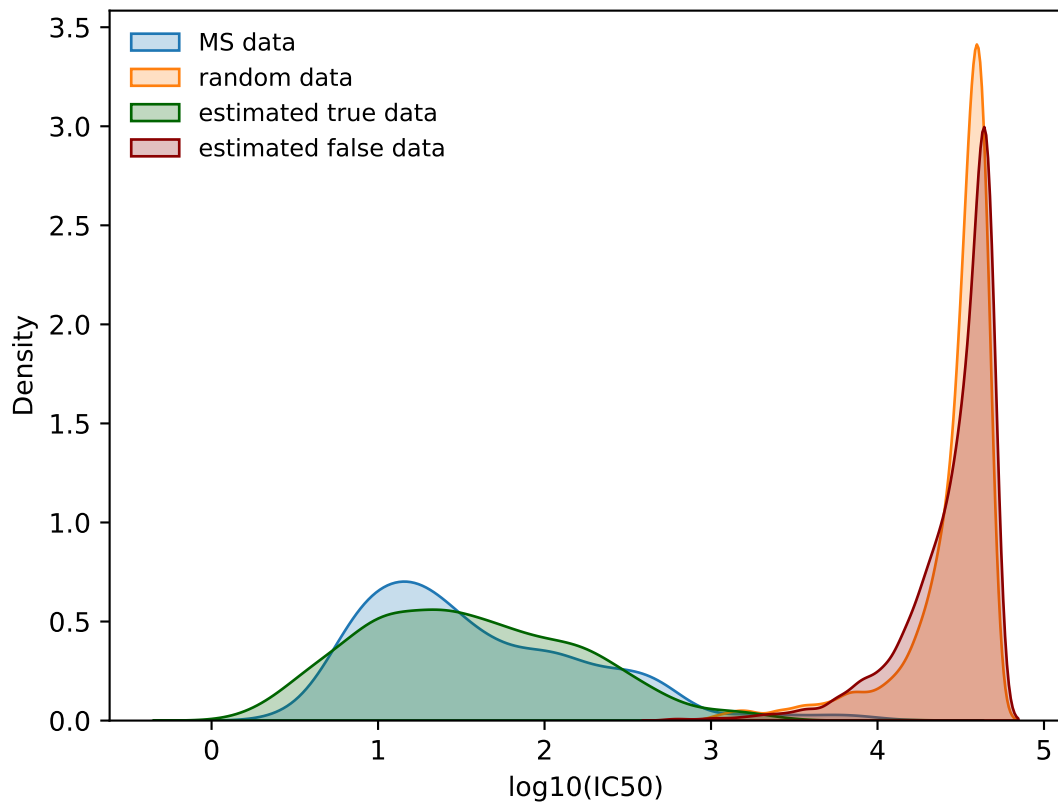

## HLA-A1102

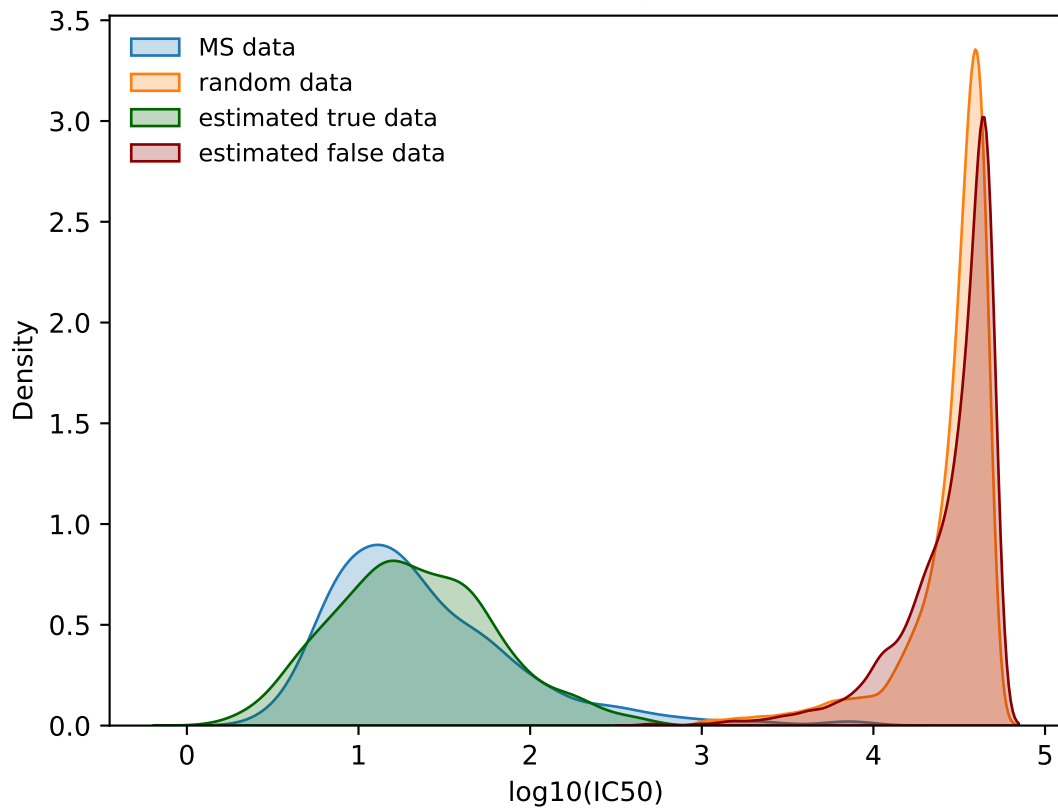

## HLA-A2301

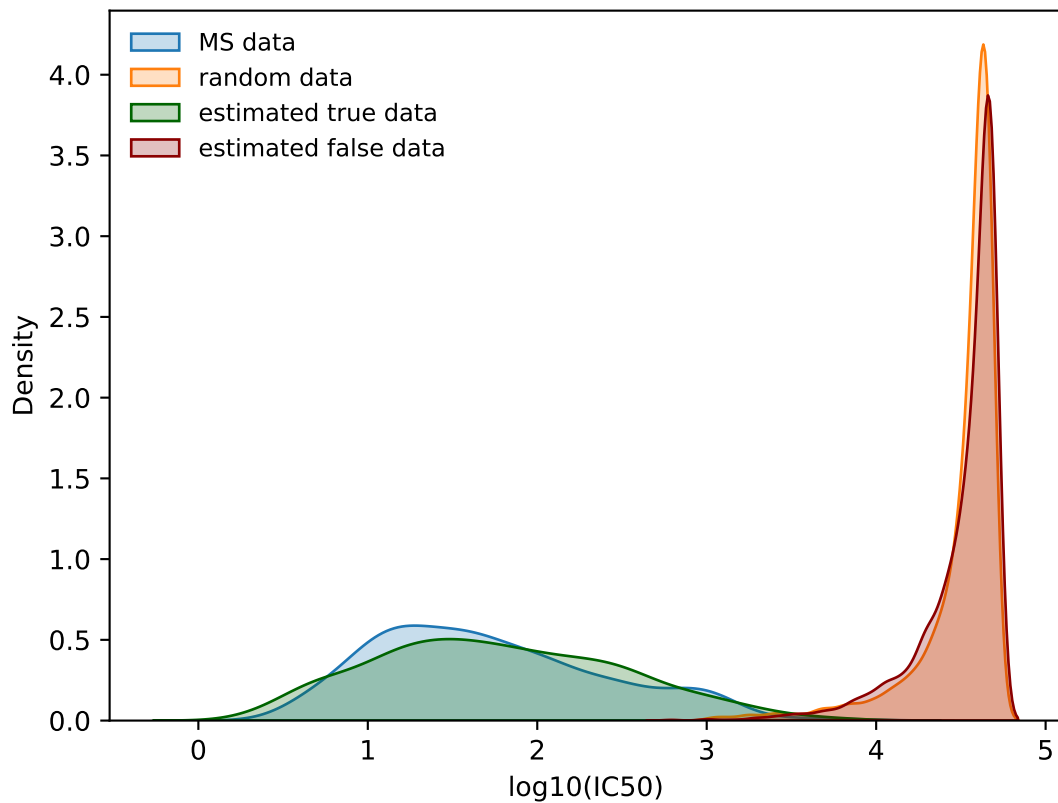

## HLA-A2402

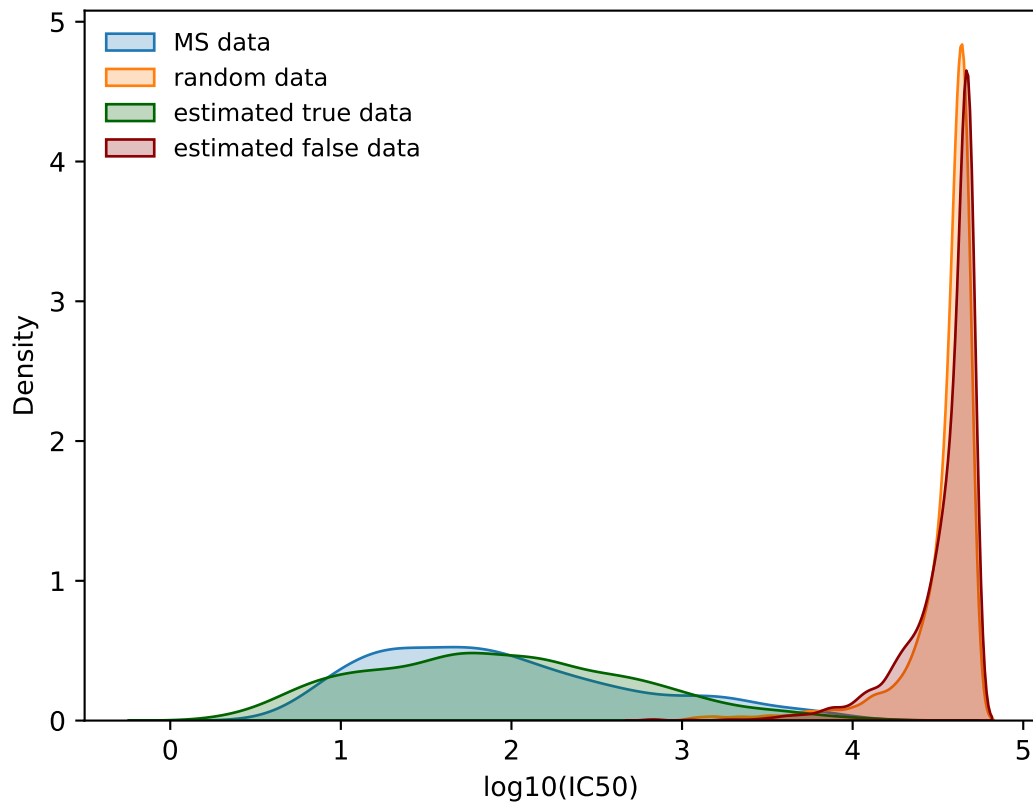

## HLA-A2407

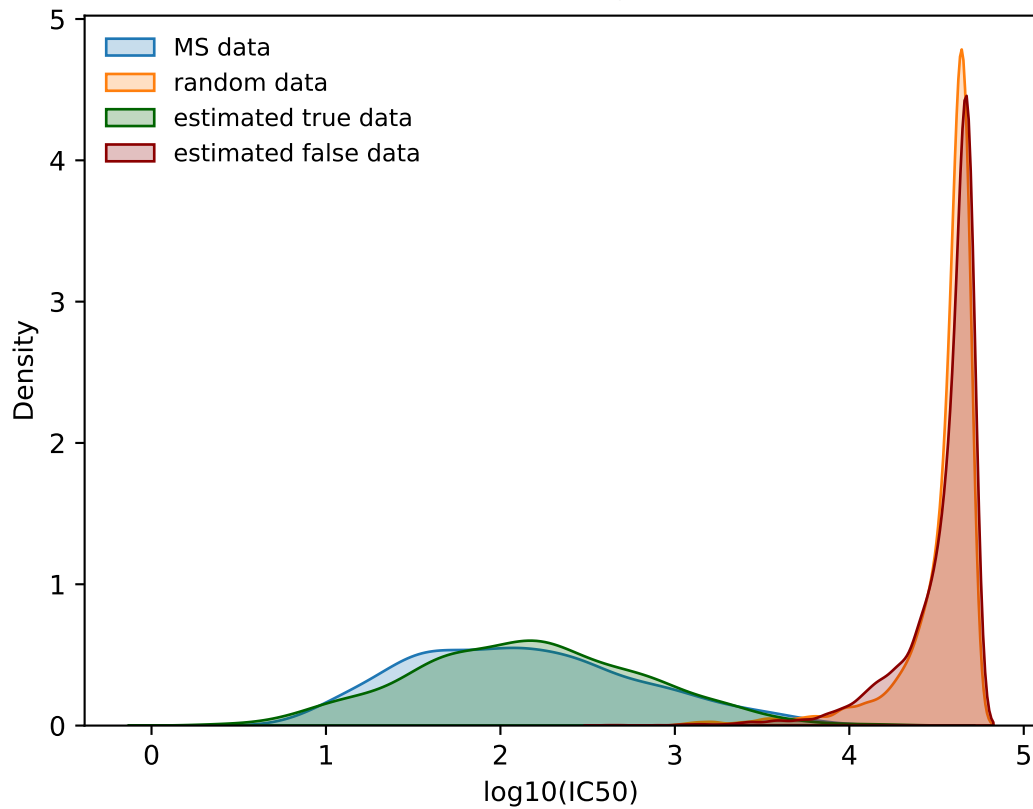

## HLA-A2902

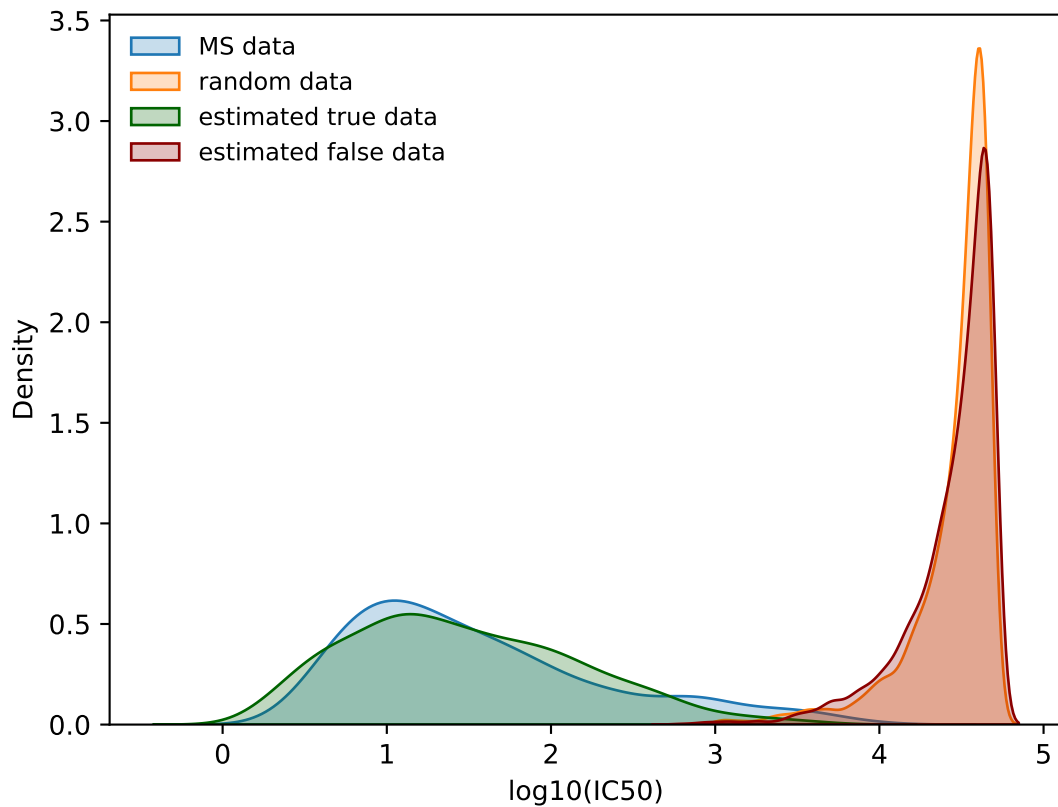

# HLA-A3001

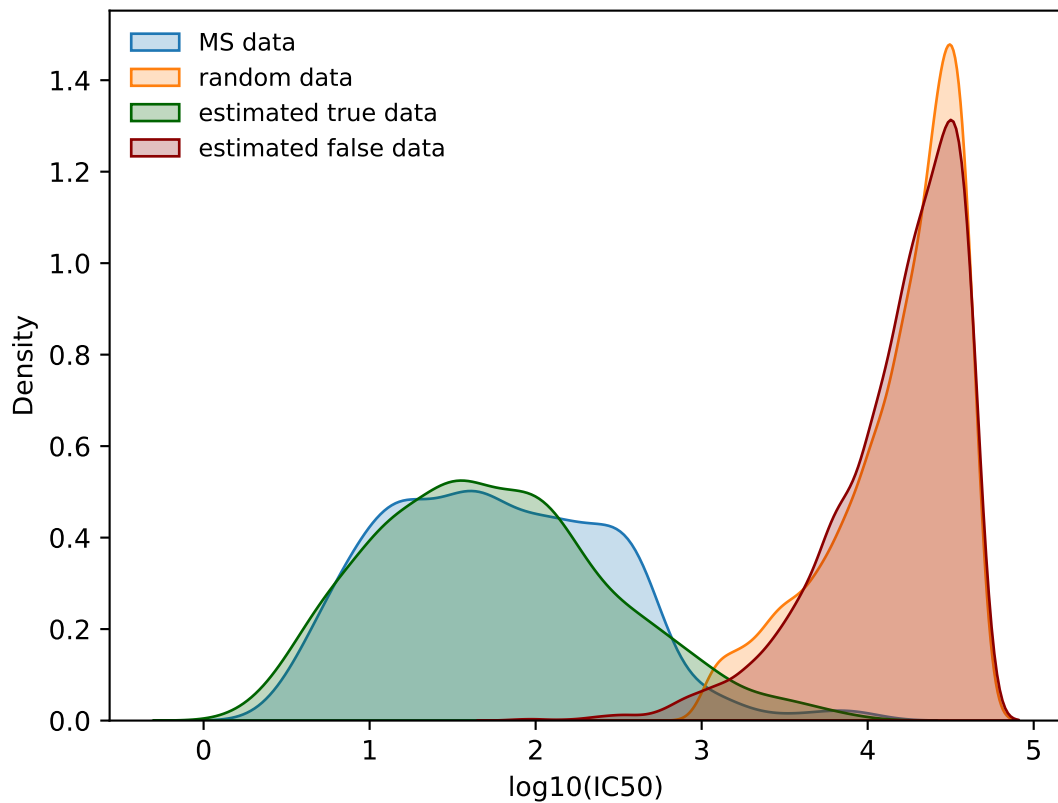

## HLA-A3002

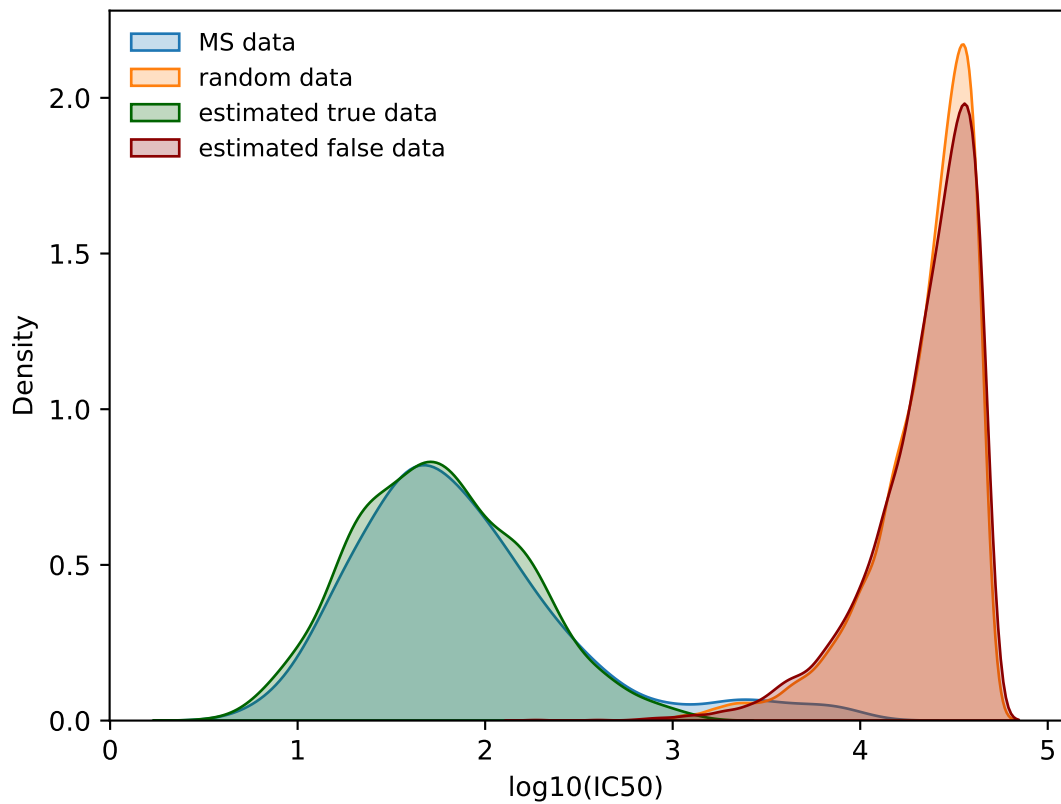

## HLA-A3201

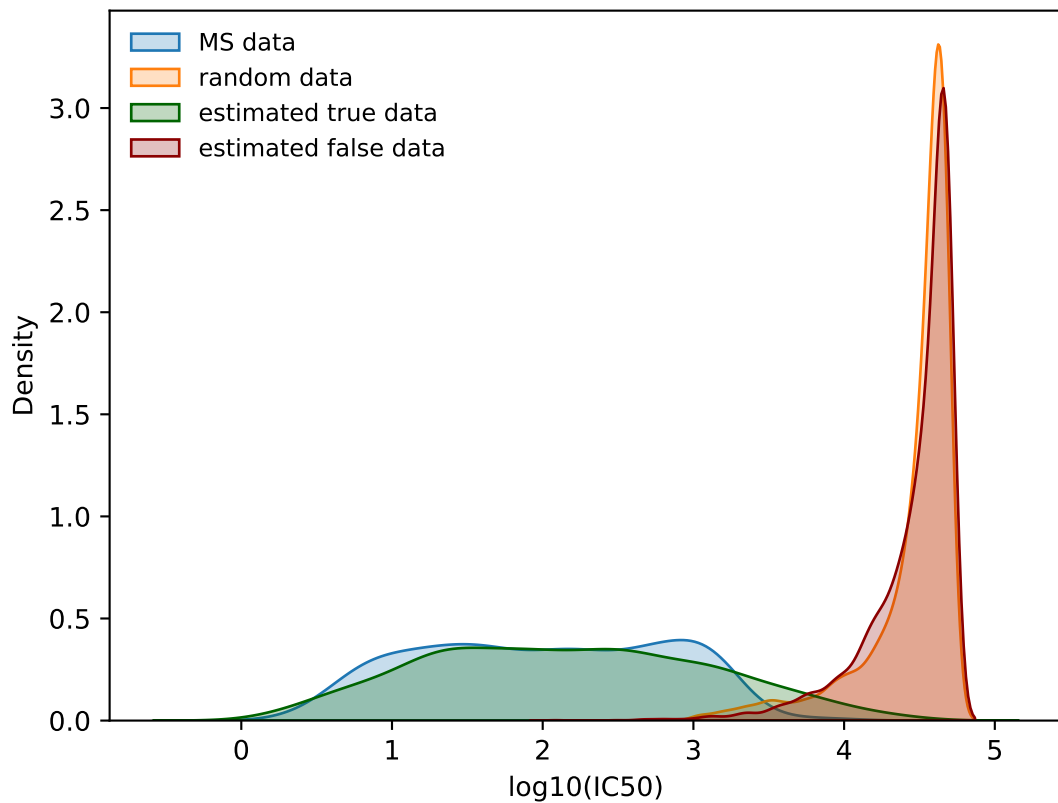

# HLA-A3301

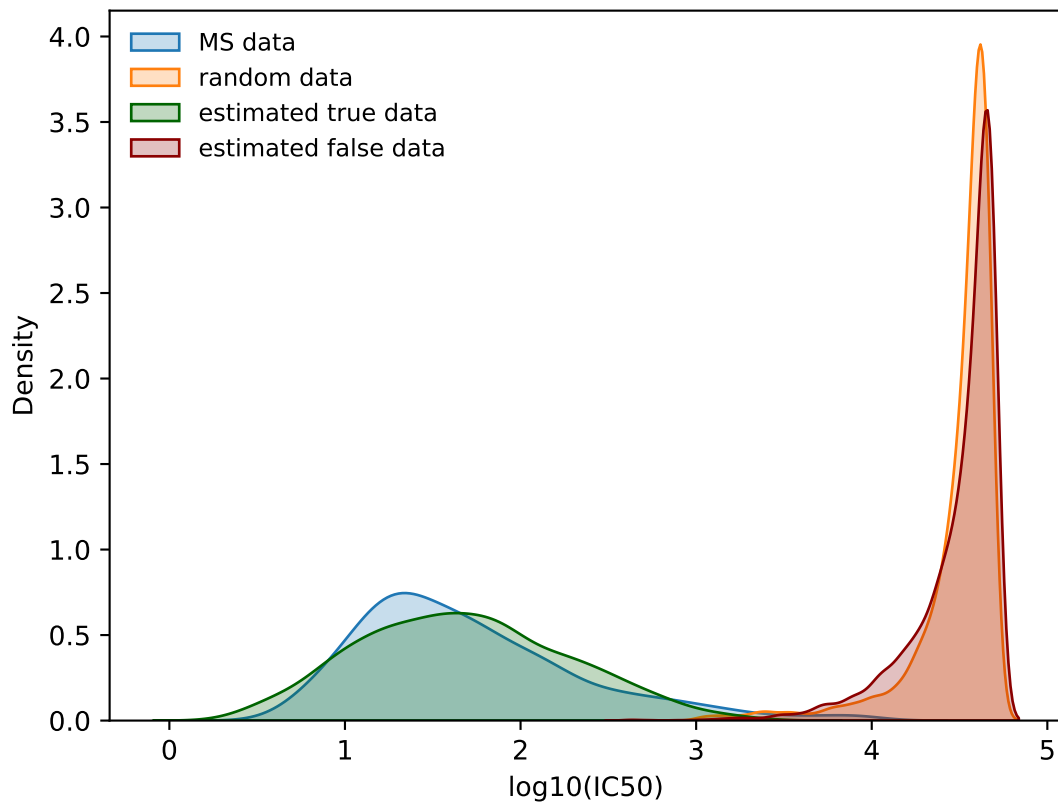

# HLA-A3303

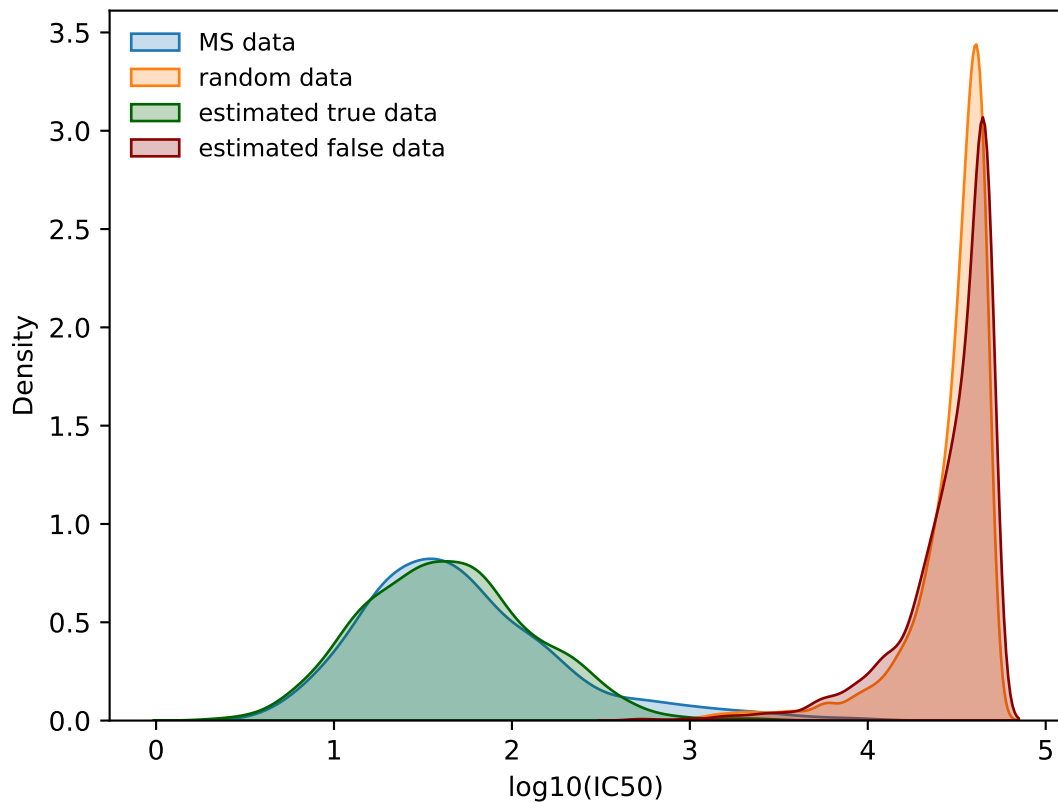

# HLA-A3401

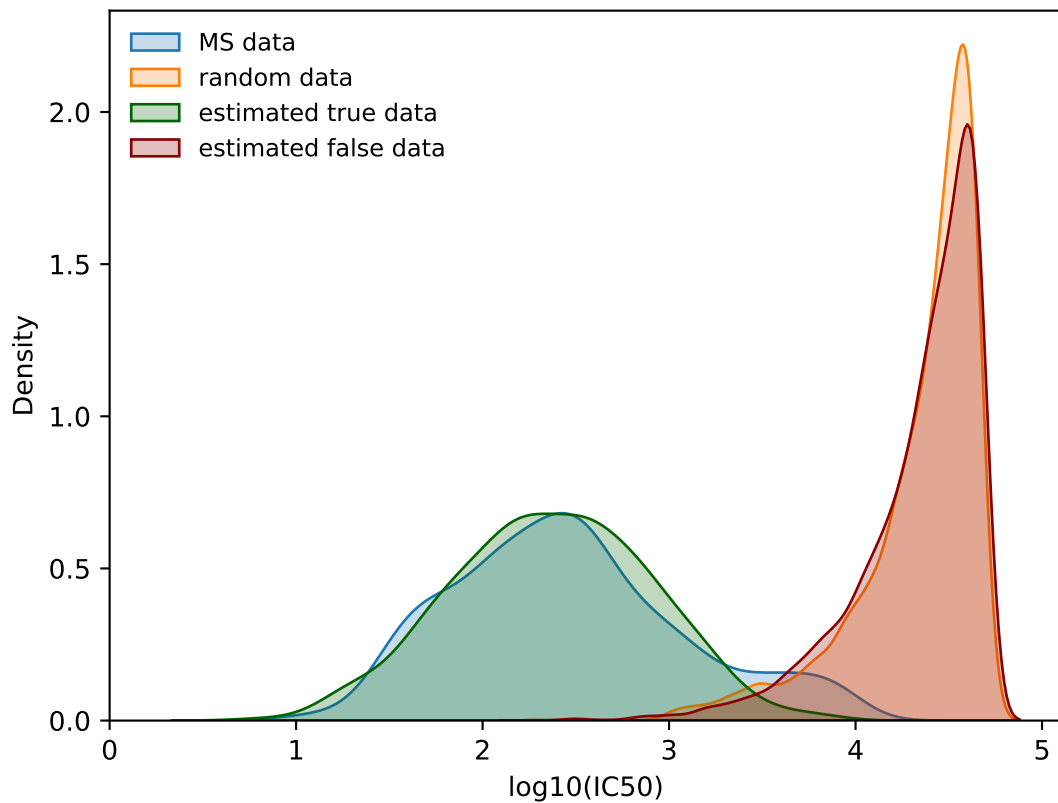

## HLA-A3402

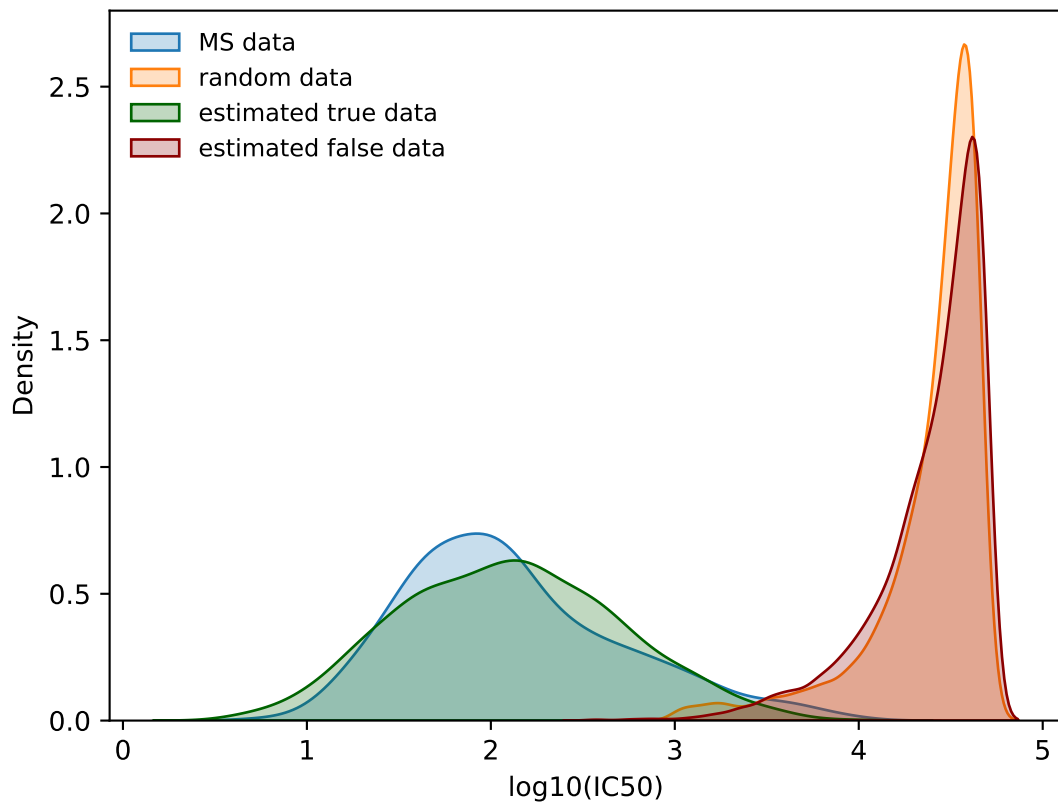

## HLA-A6601

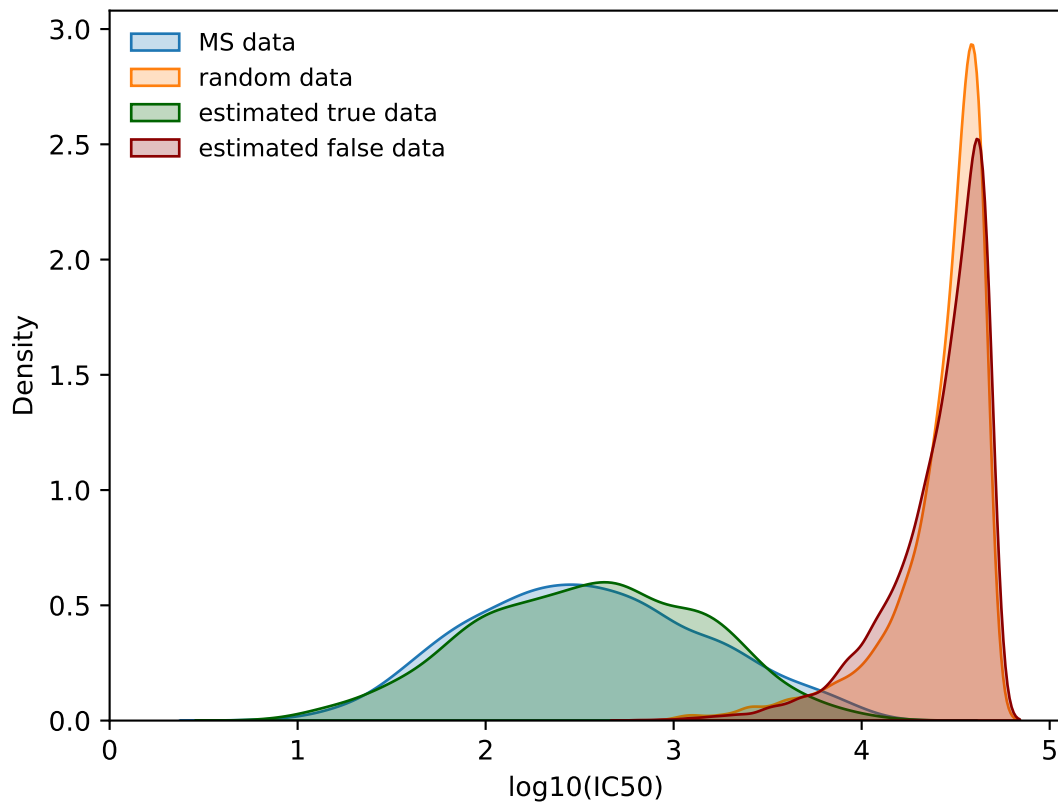

## HLA-A6801

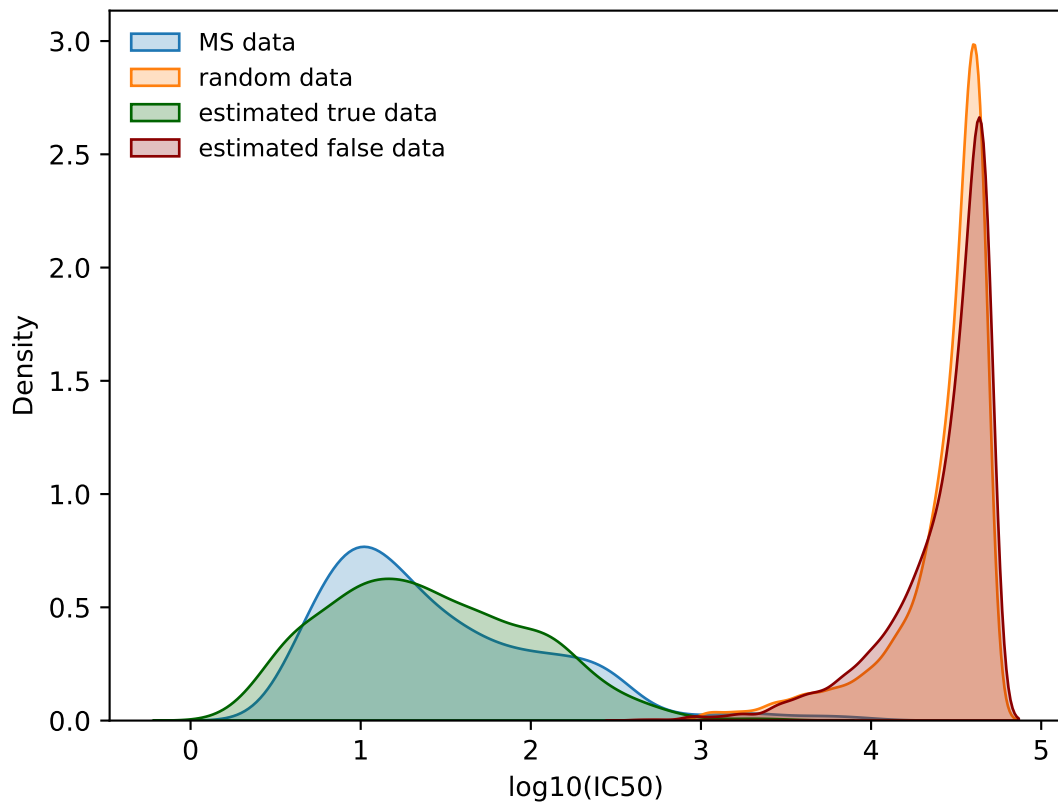

## HLA-A6802

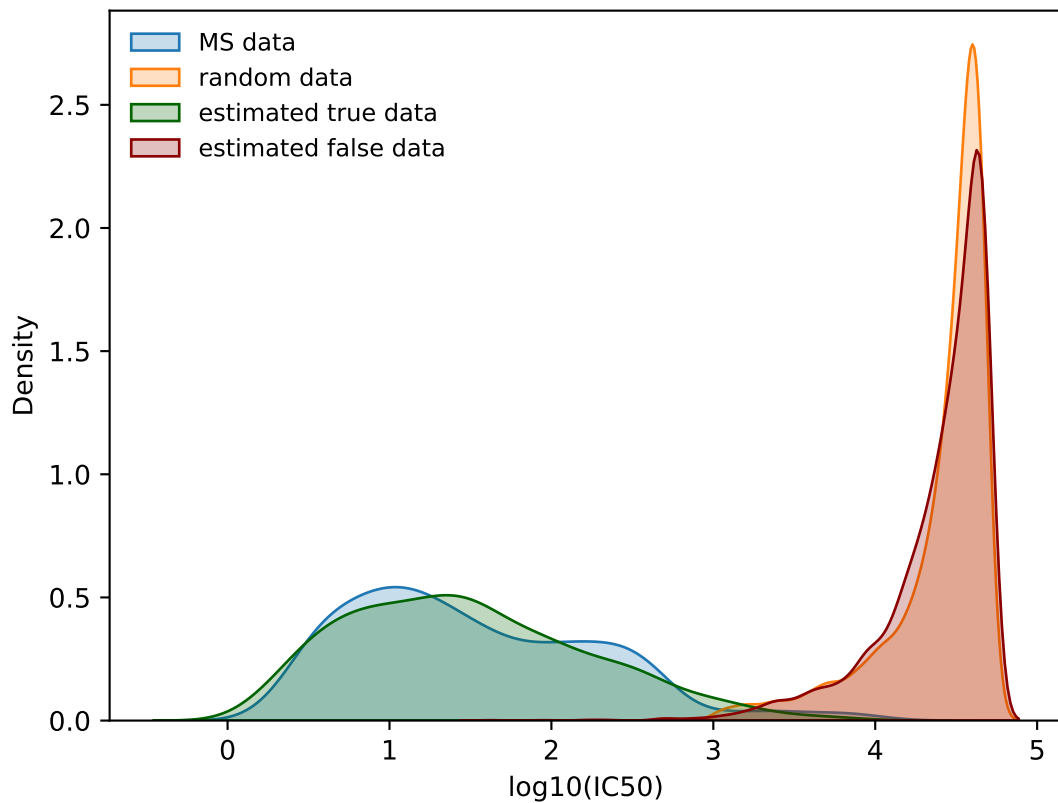

# HLA-A7401

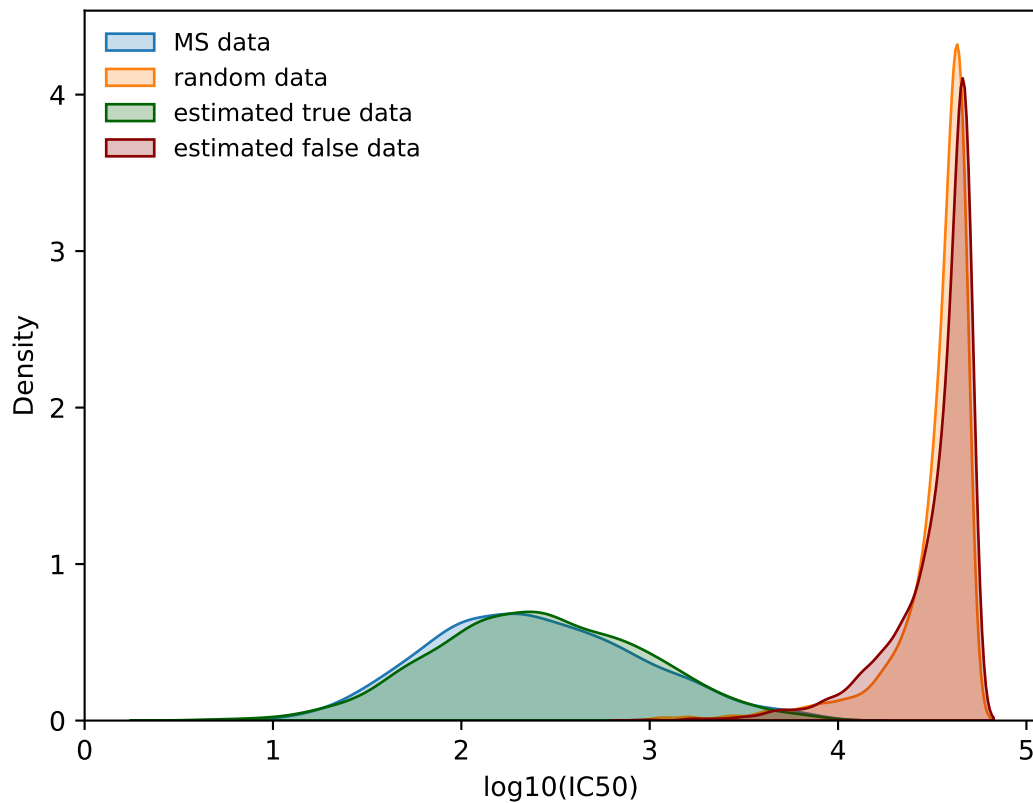

## HLA-B0702

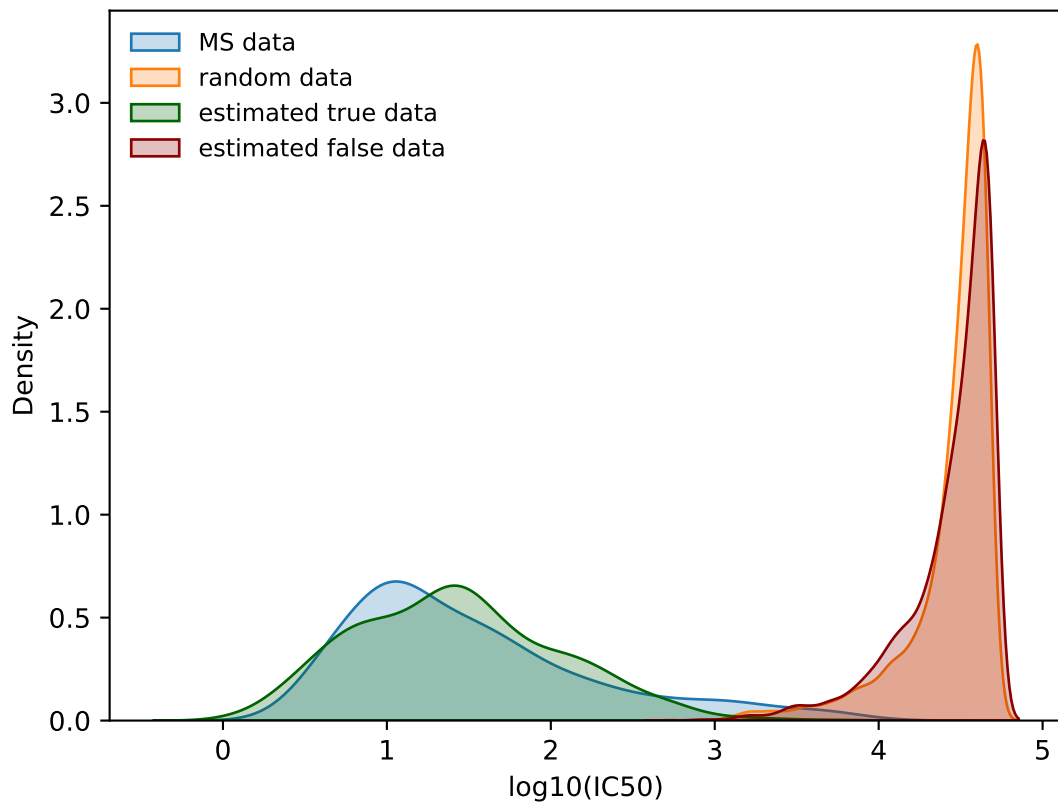

# HLA-B0801

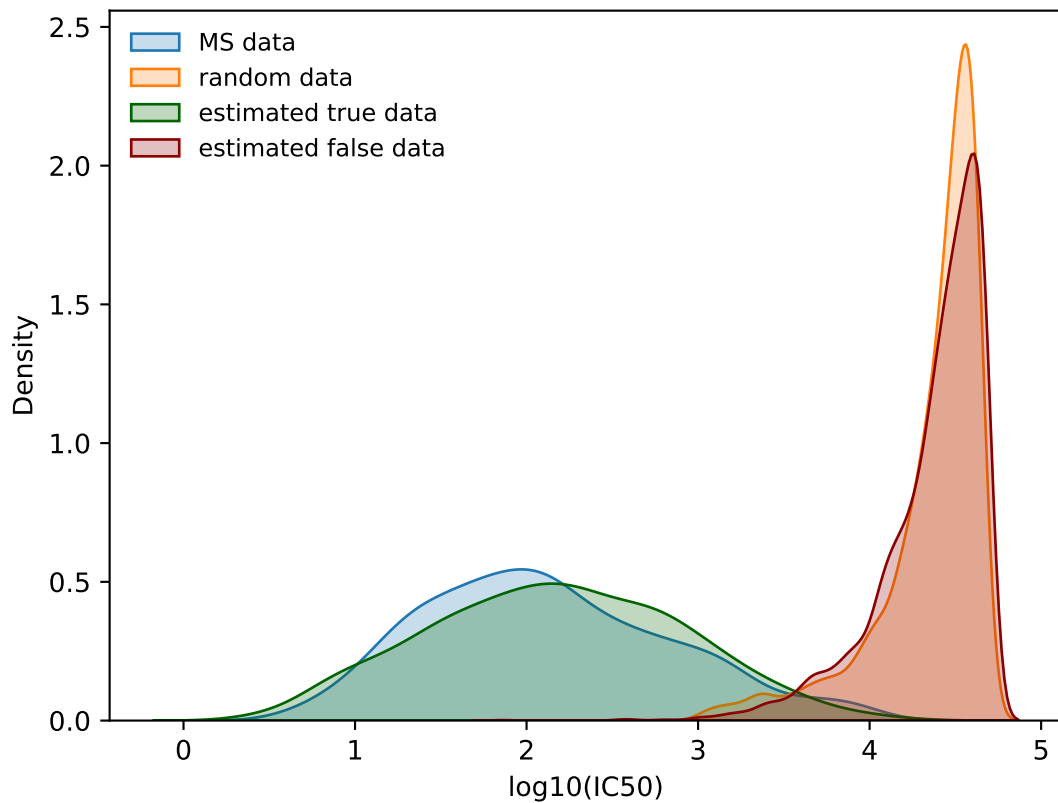

# HLA-B1301

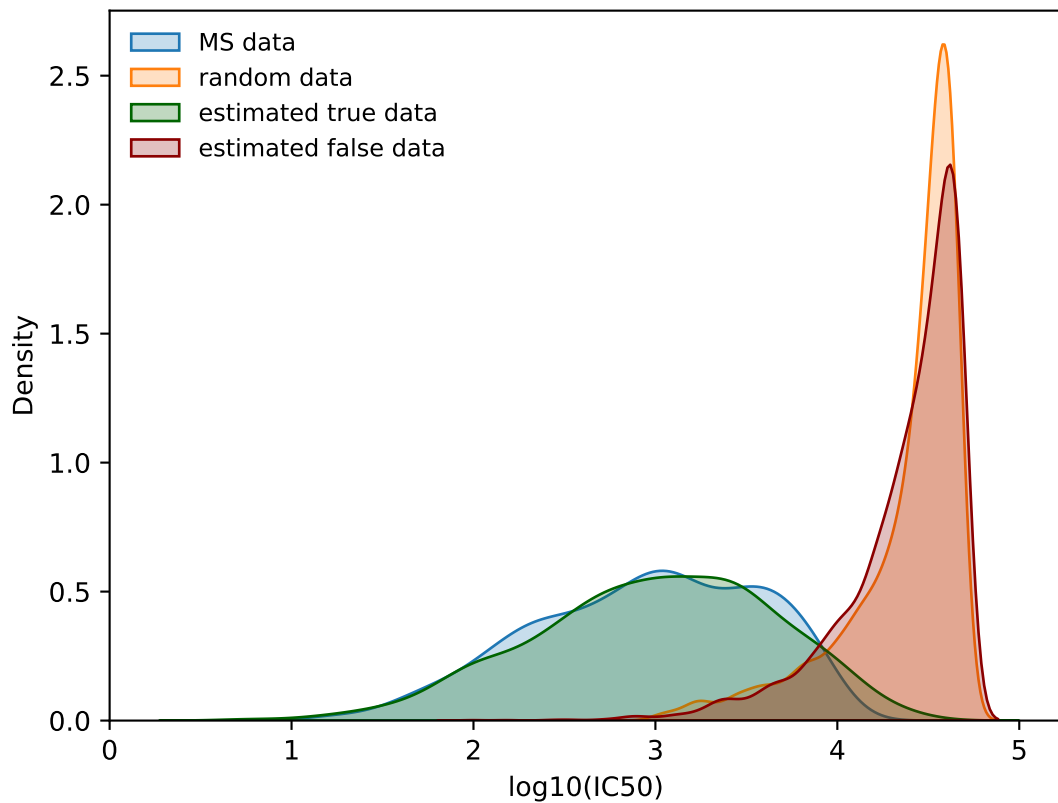

## HLA-B1302

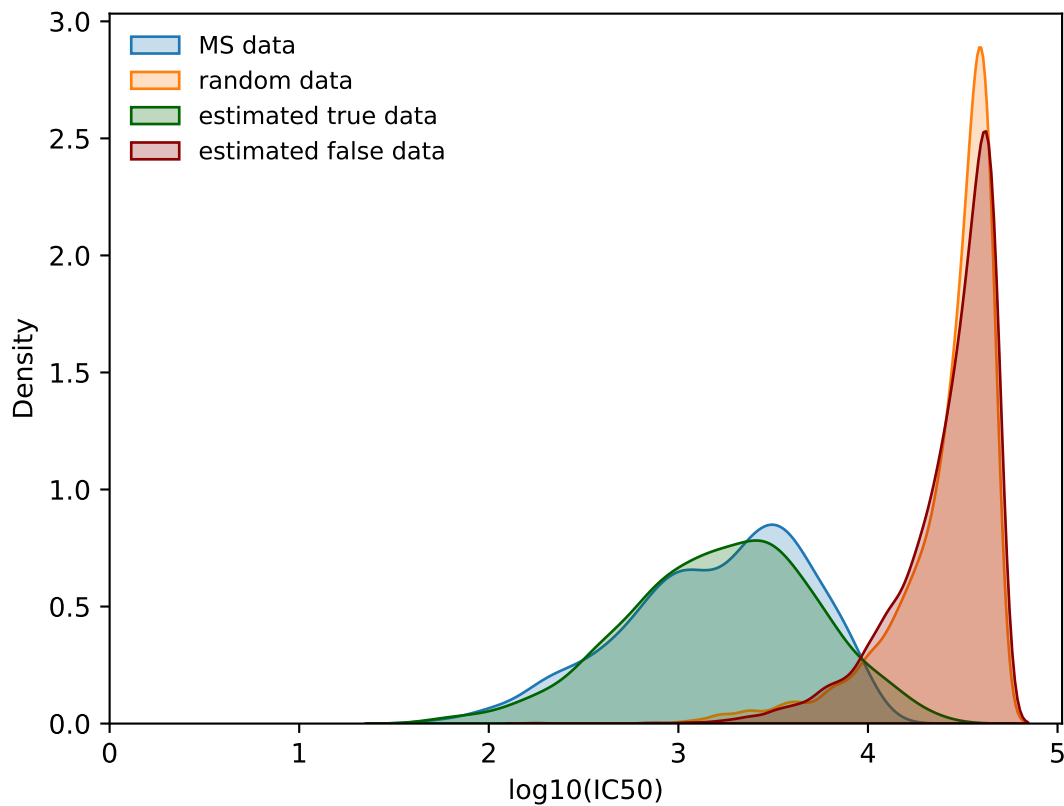

## HLA-B1402

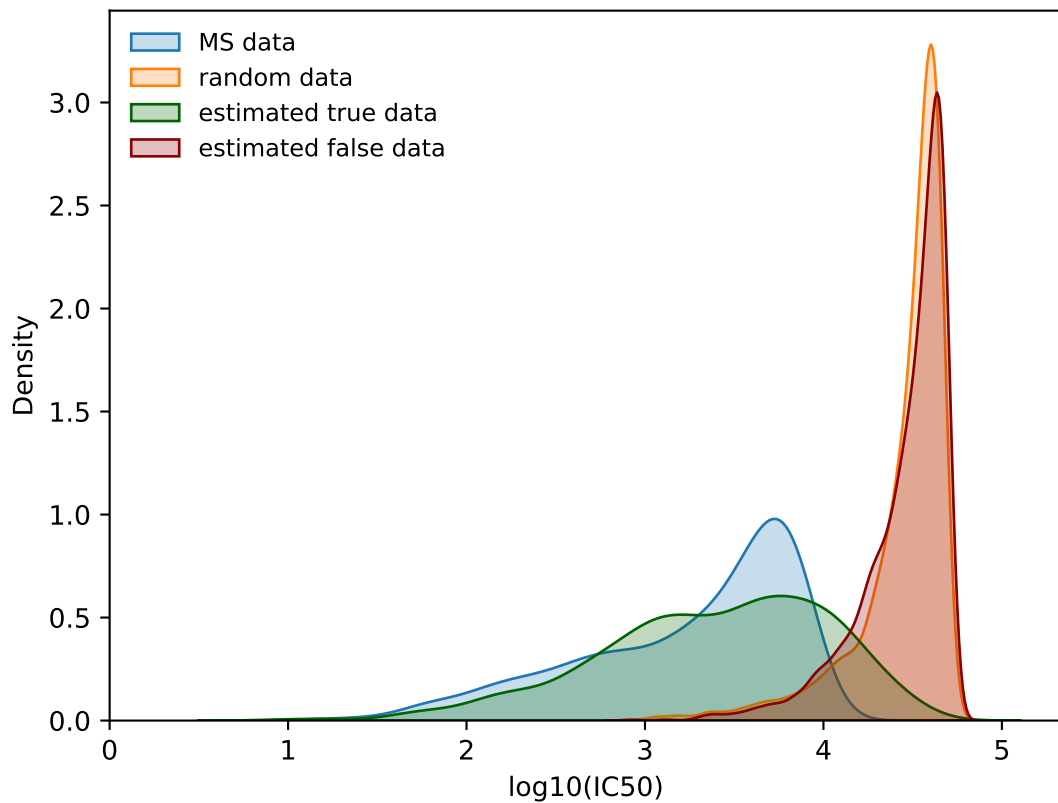

## HLA-B1501

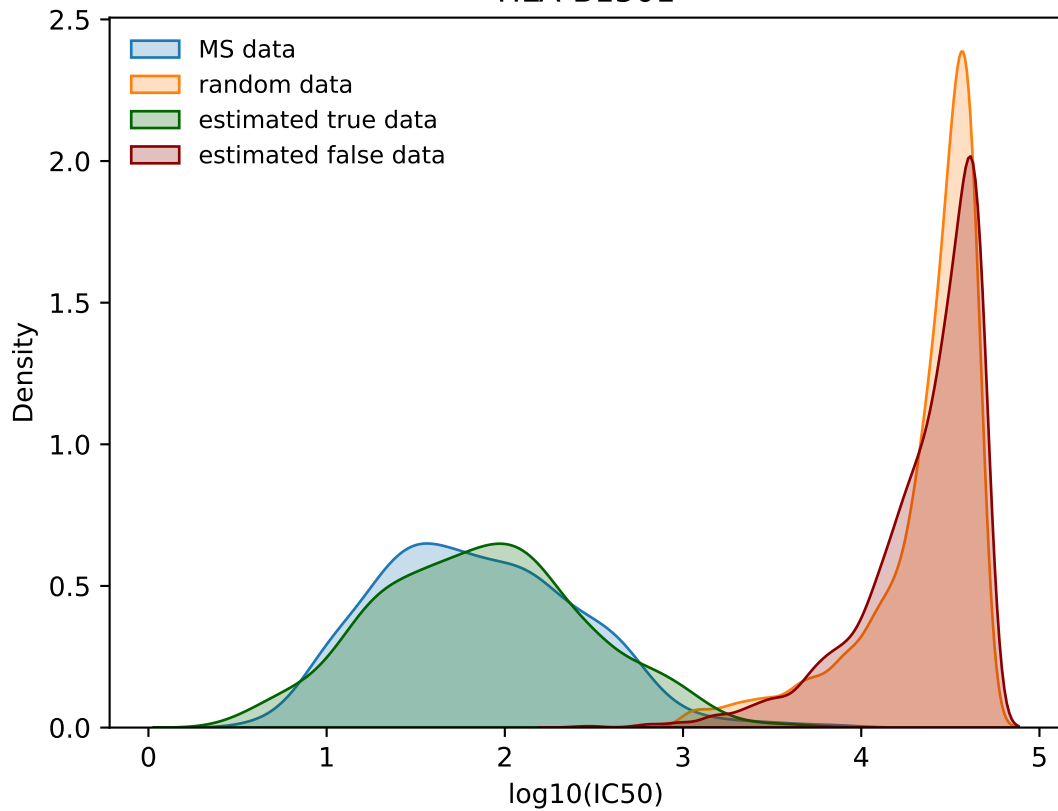

## HLA-B1502

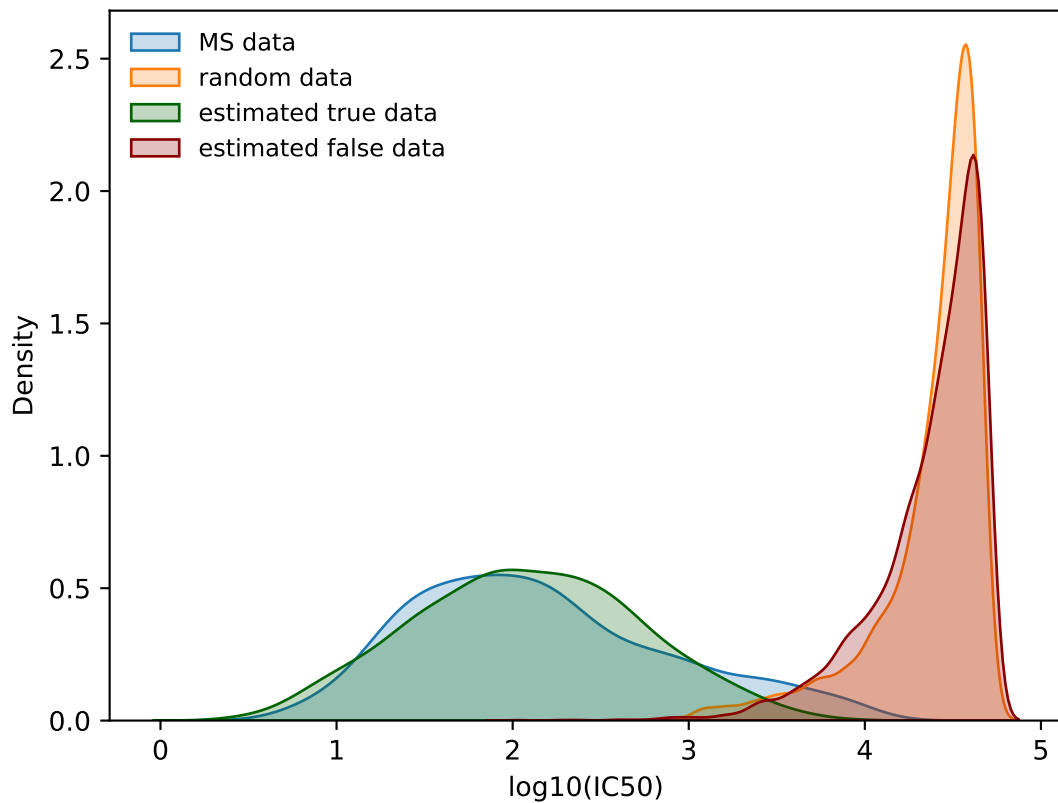

## HLA-B1503

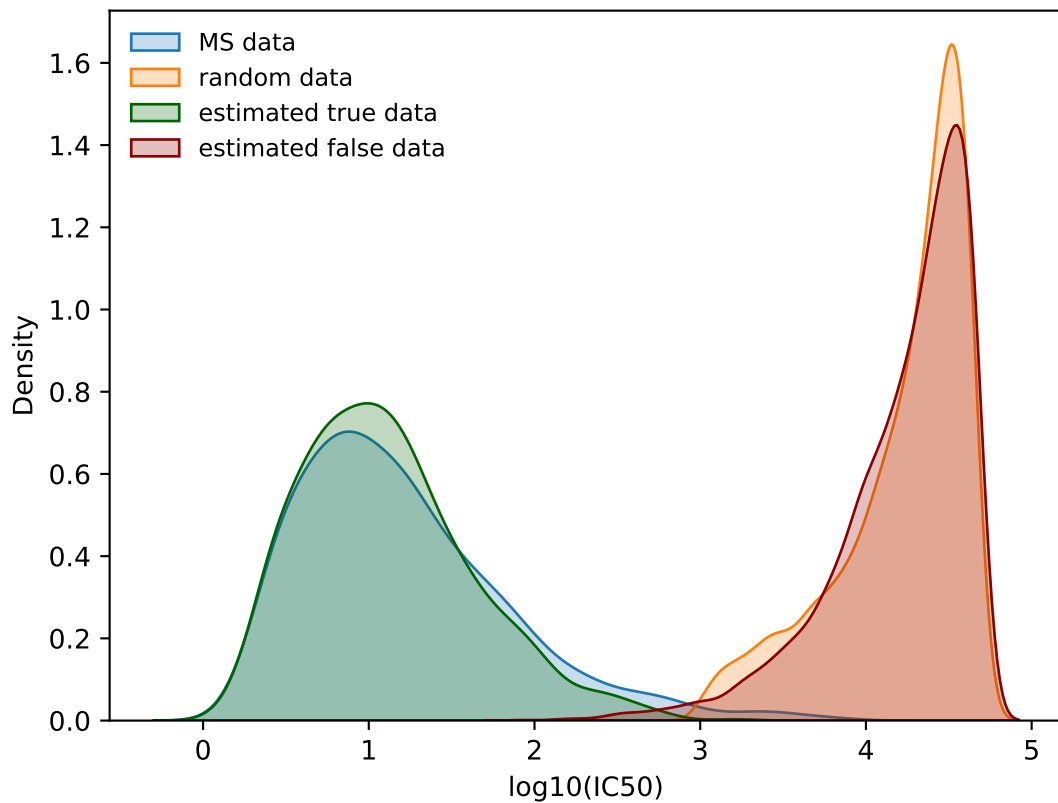

## HLA-B1510

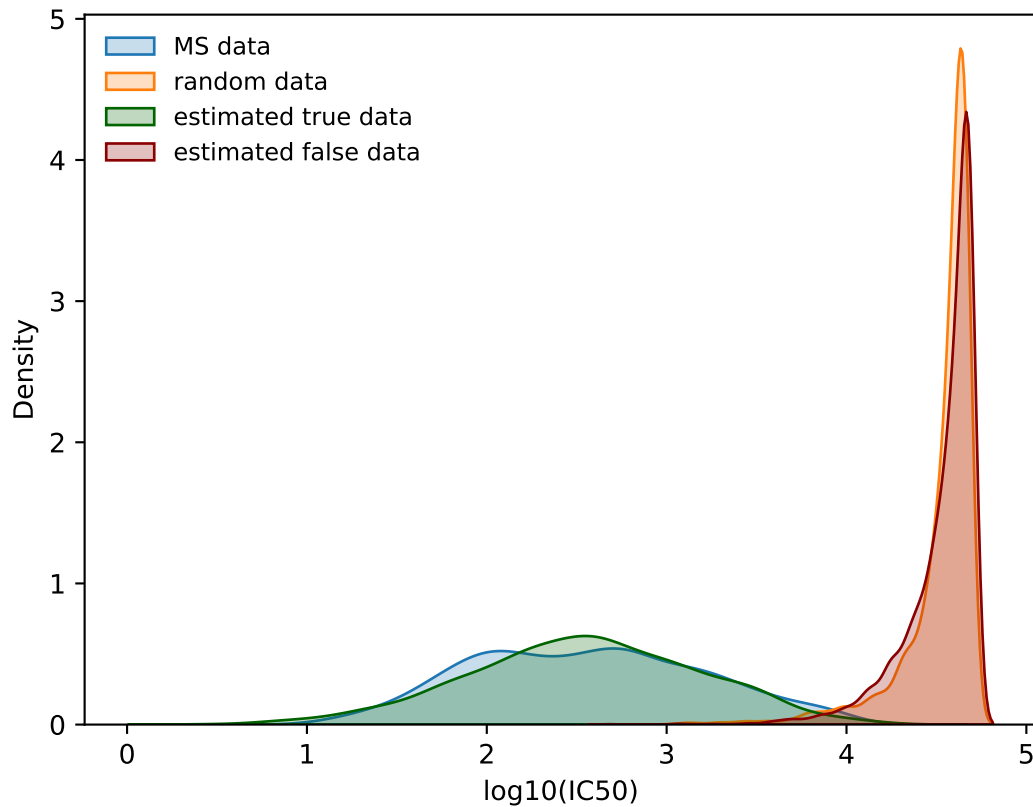

## HLA-B1517

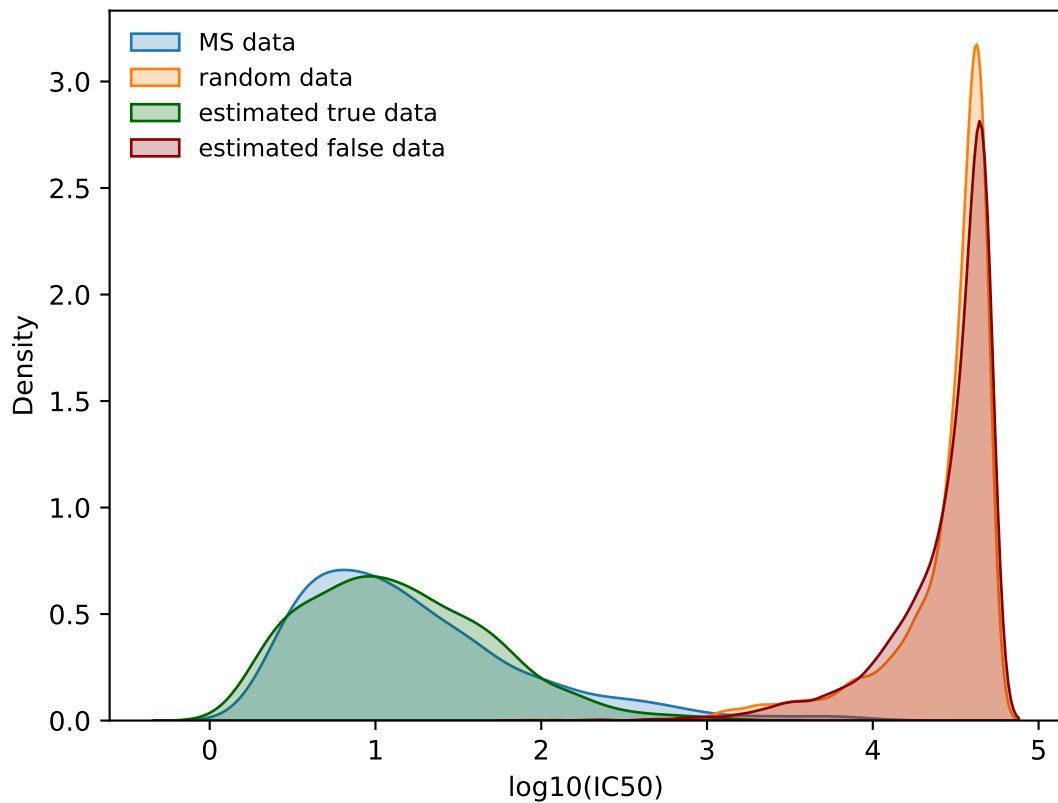

# HLA-B1801

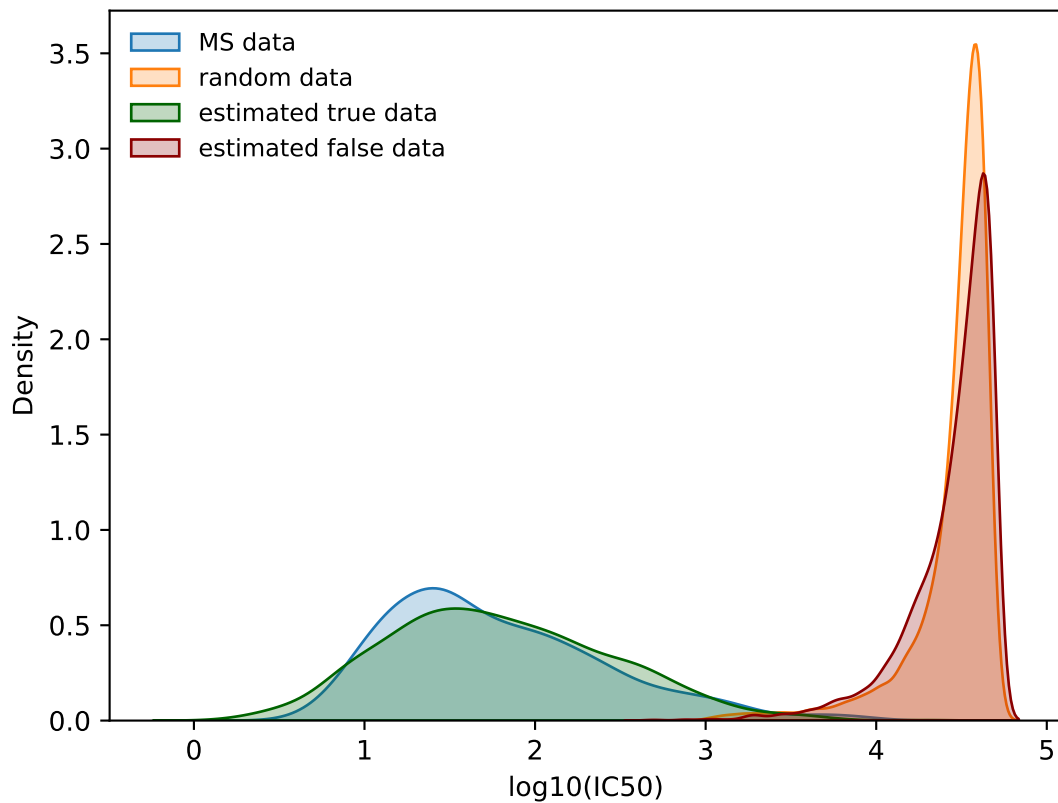

# HLA-B2701

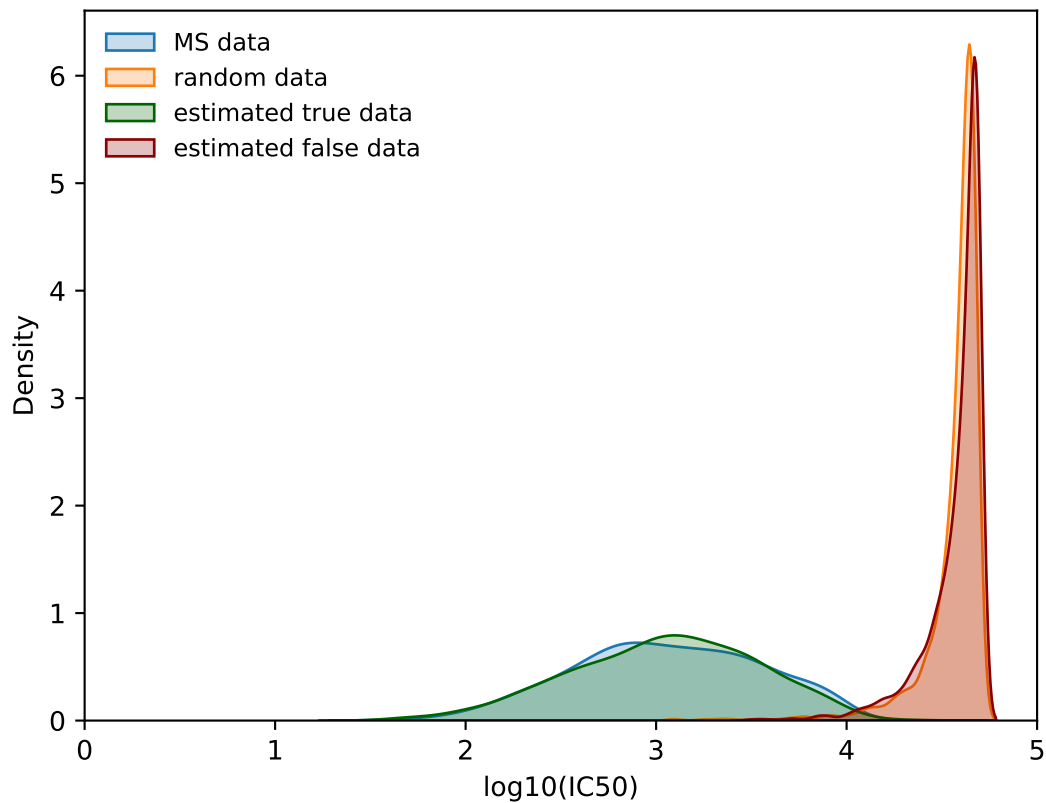

## HLA-B2702

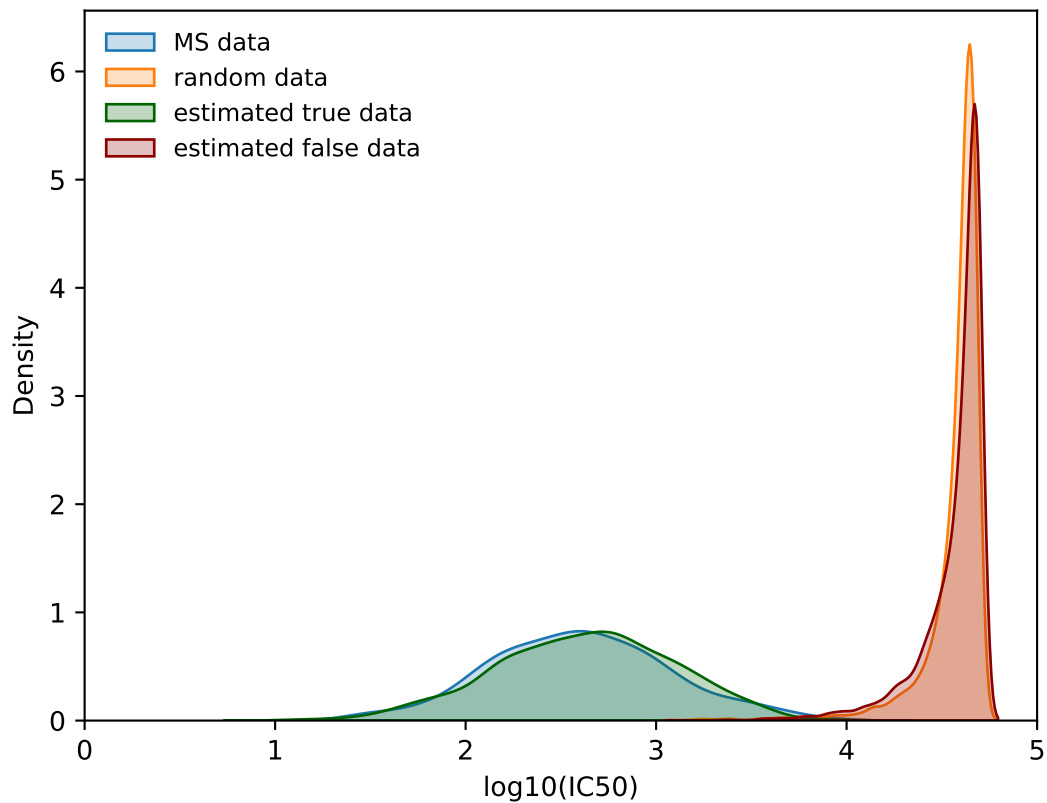

## HLA-B2705

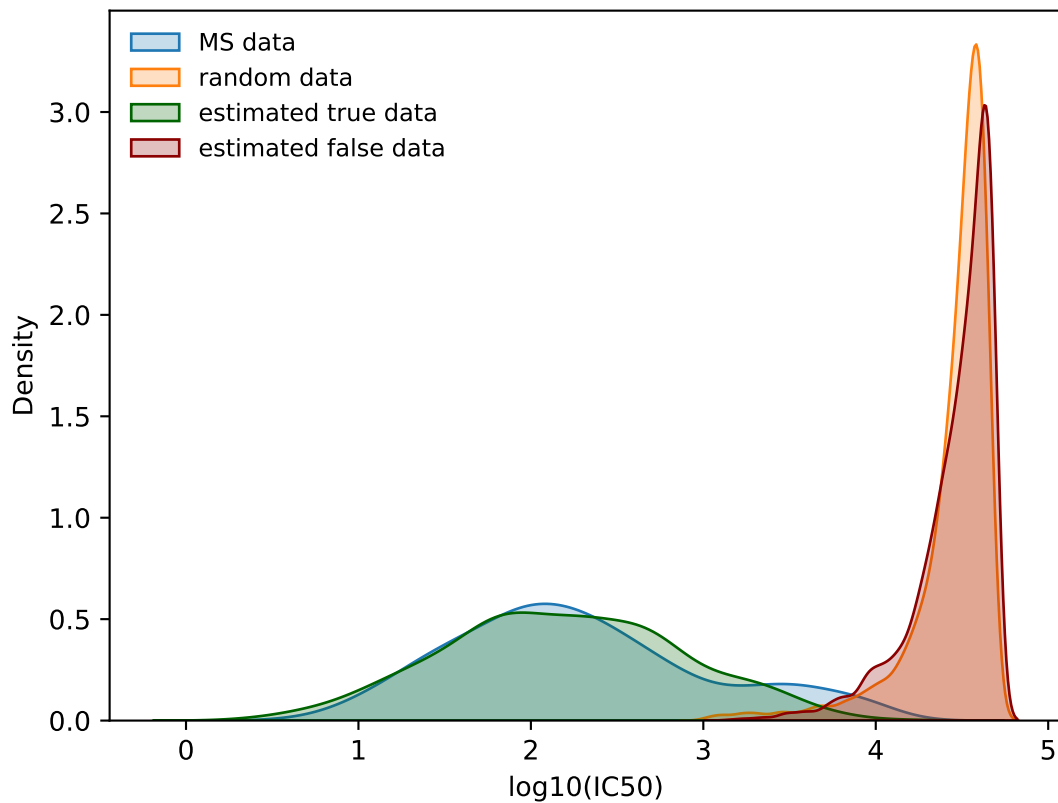

## HLA-B2707

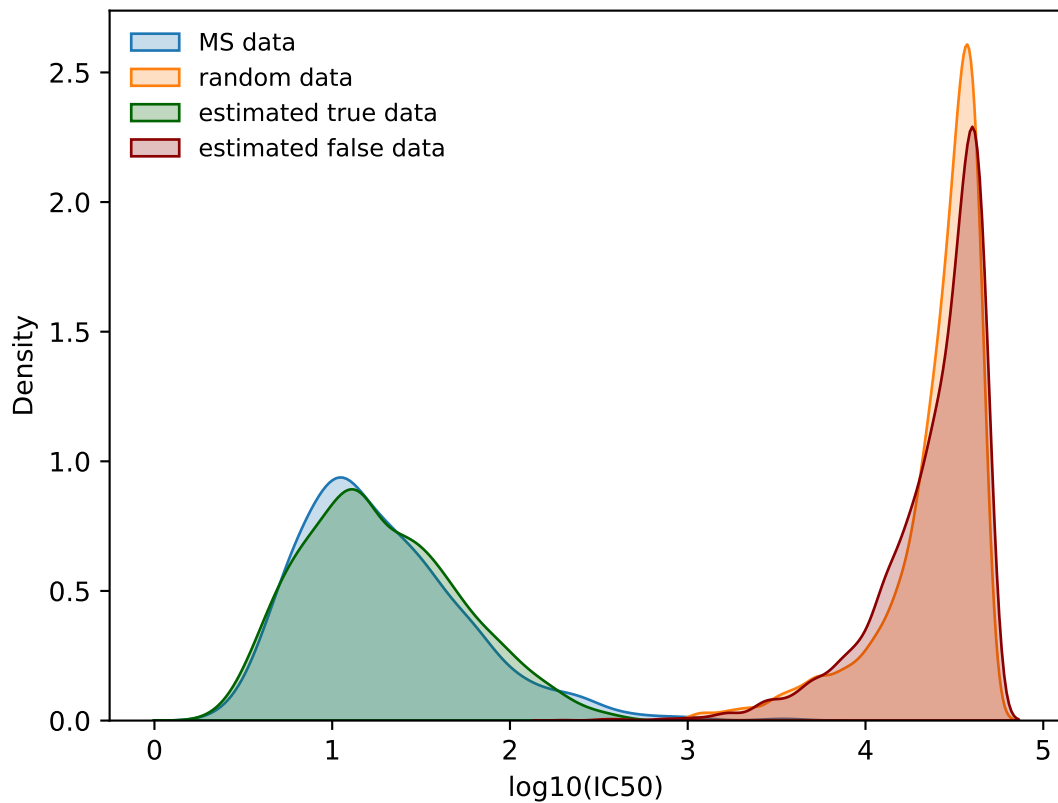

## HLA-B2709

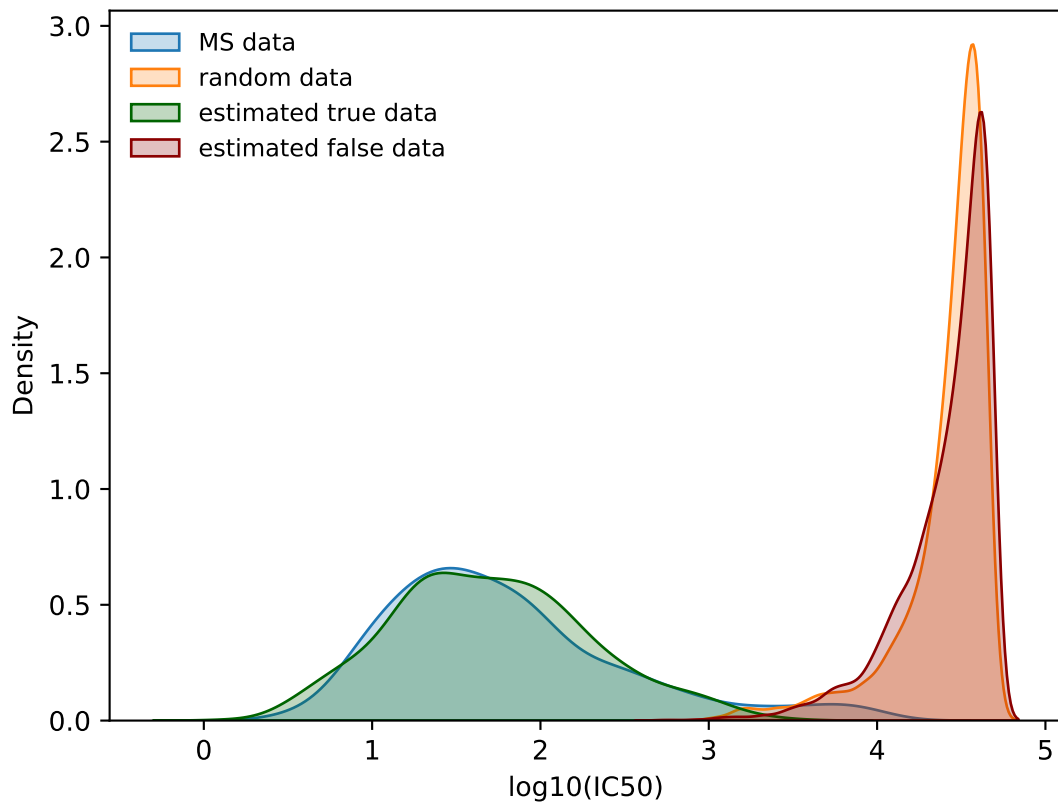

# HLA-B3501

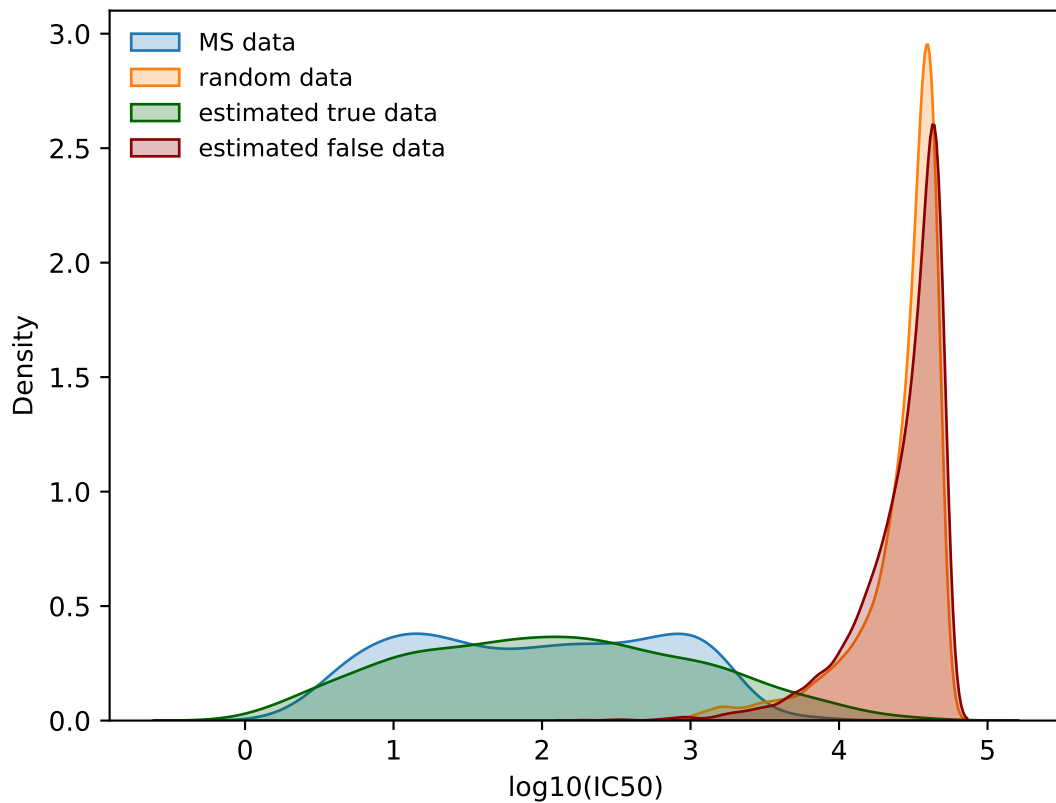

# HLA-B3503

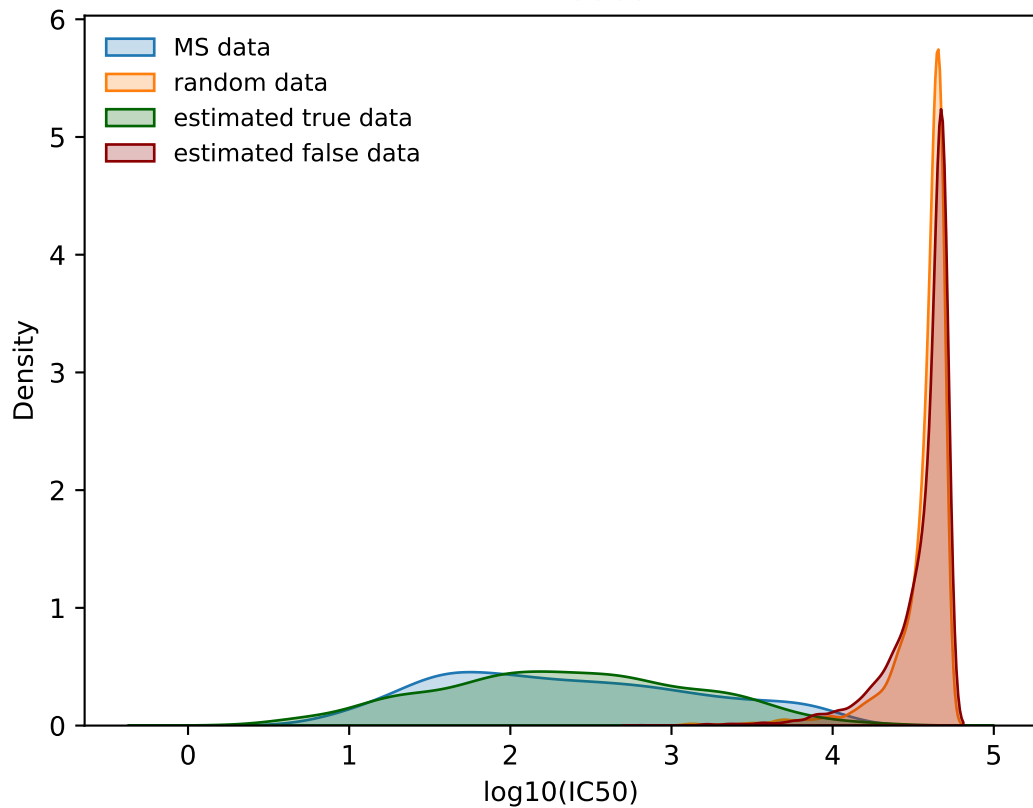

# HLA-B3507

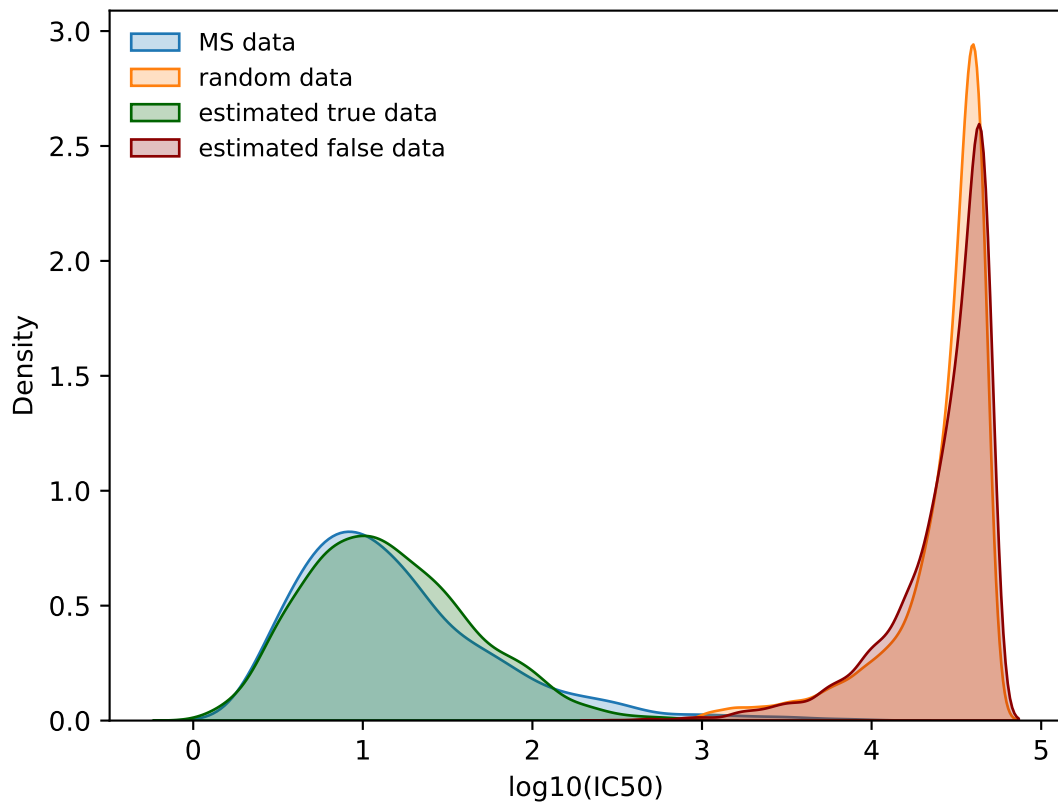

# HLA-B3701

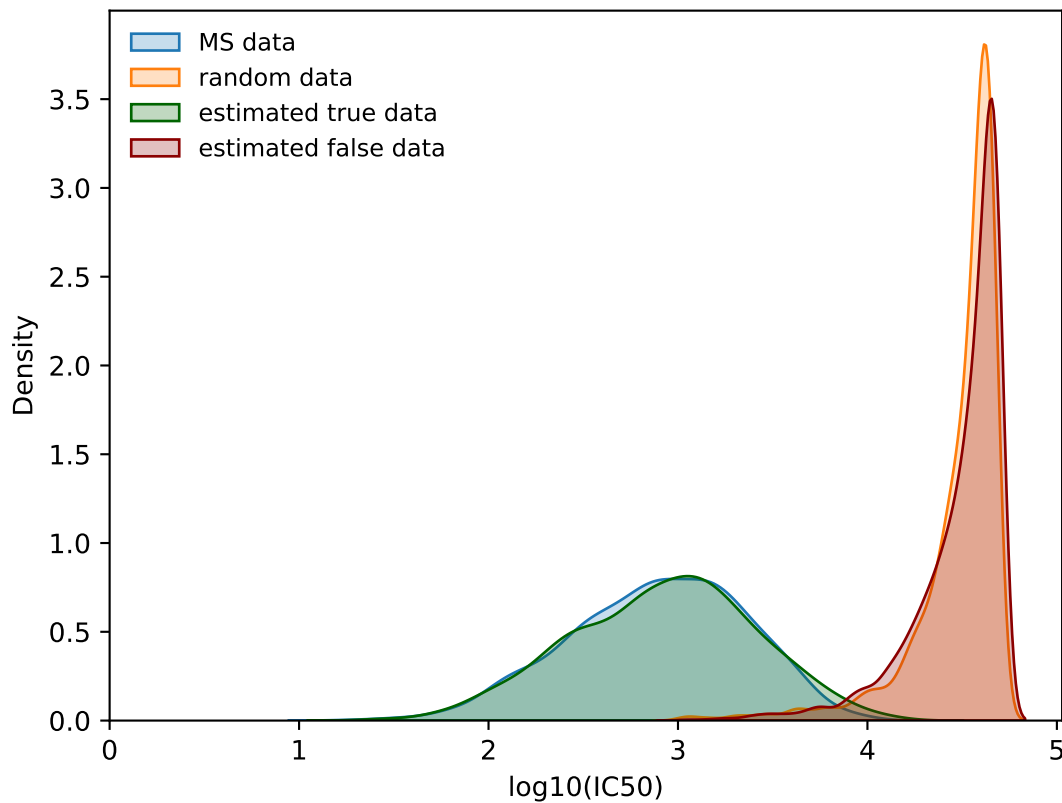

# HLA-B3801

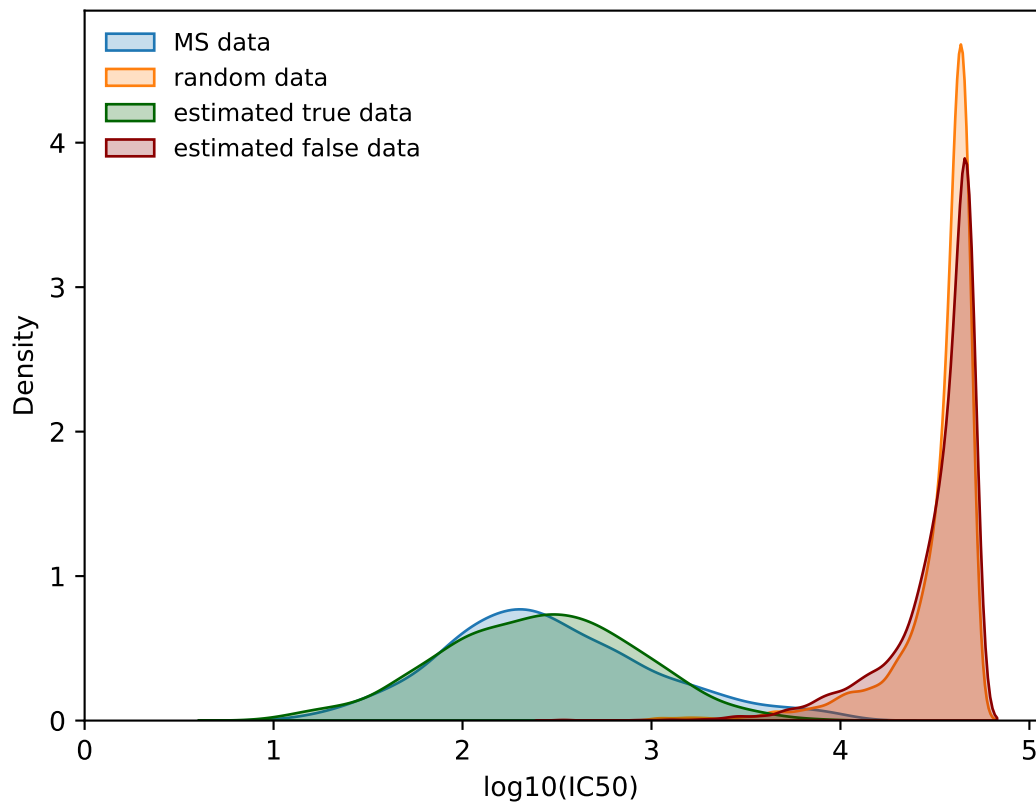

## HLA-B3802

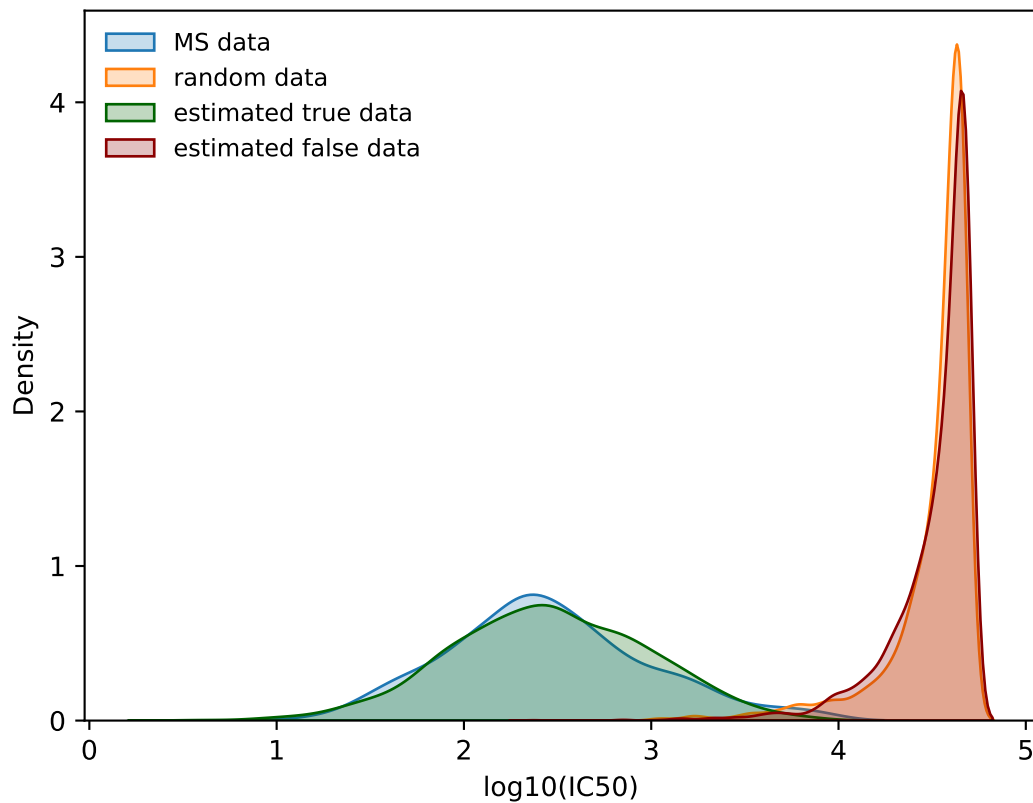

## HLA-B3901

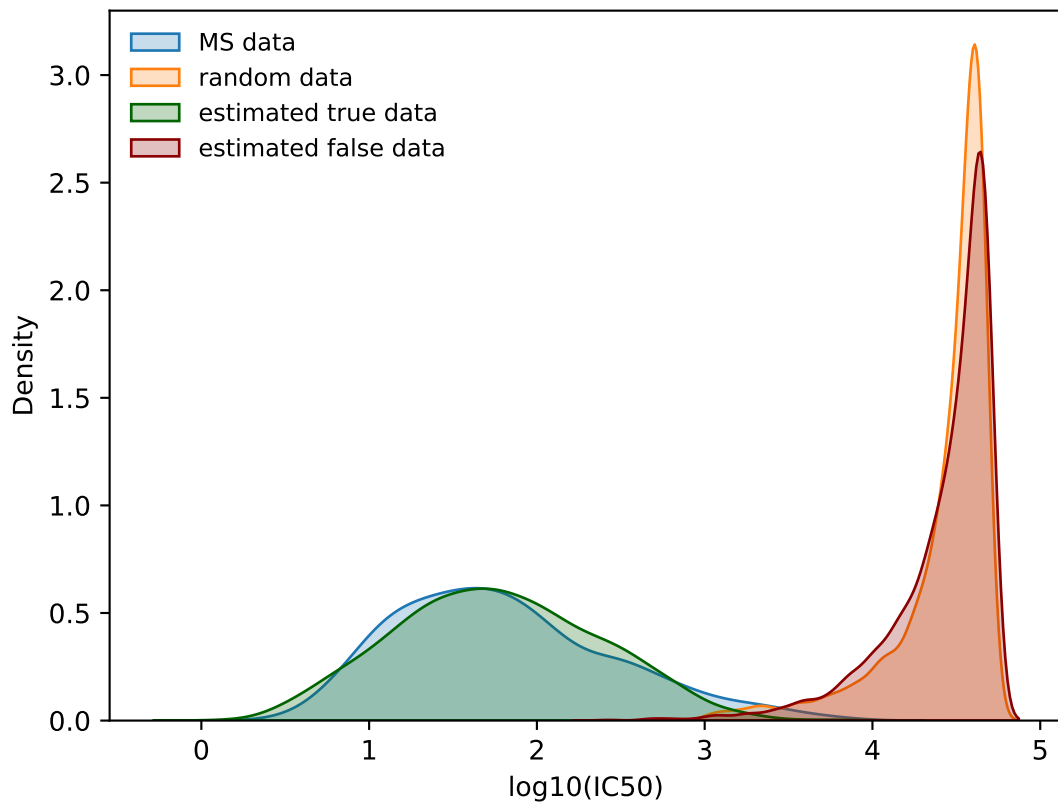

# HLA-B4001

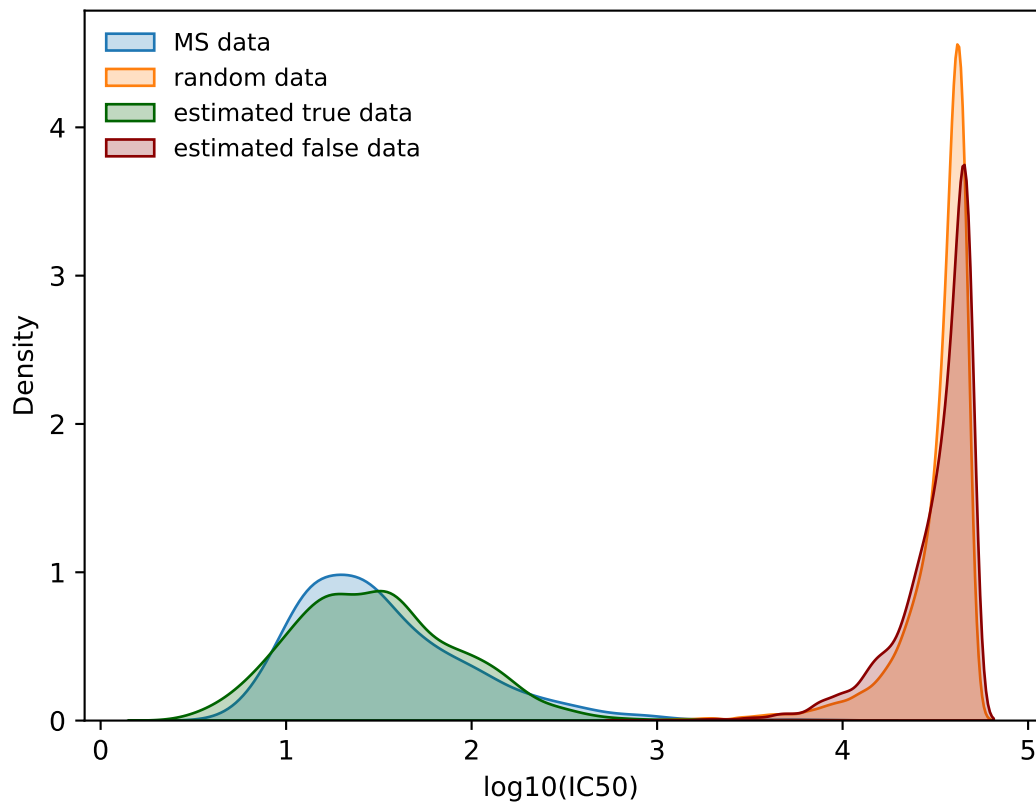

## HLA-B4002

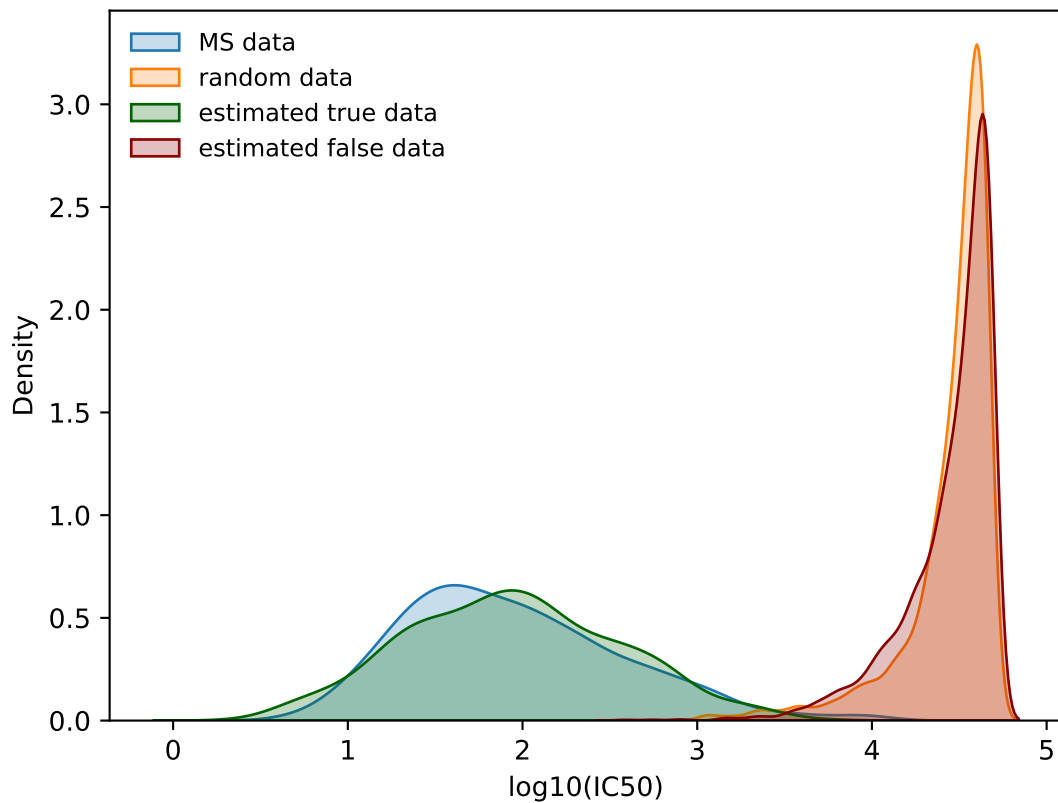

## HLA-B4006

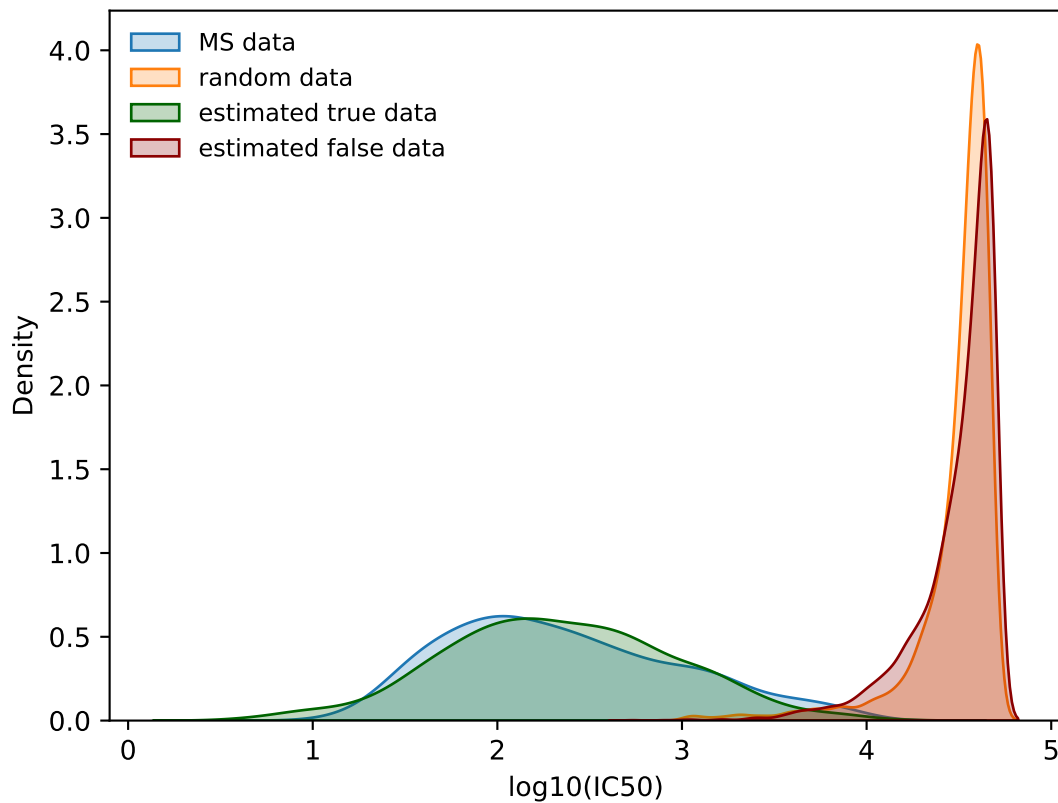

## HLA-B4201

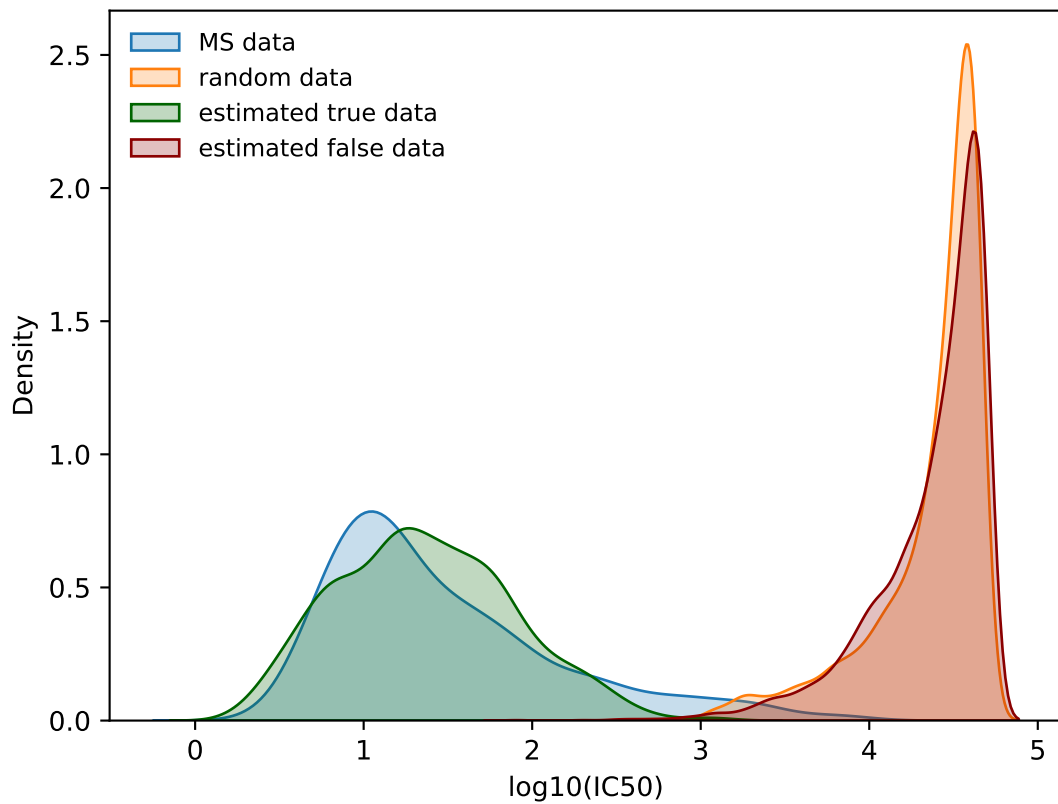

## HLA-B4402

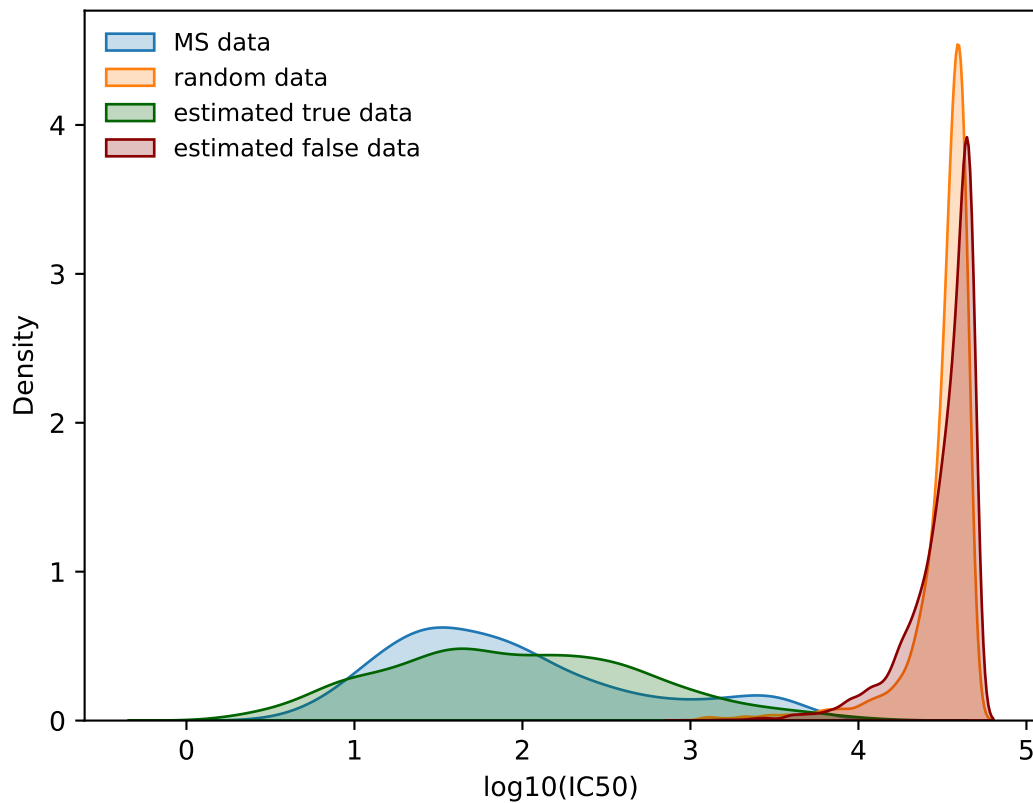

## HLA-B4403

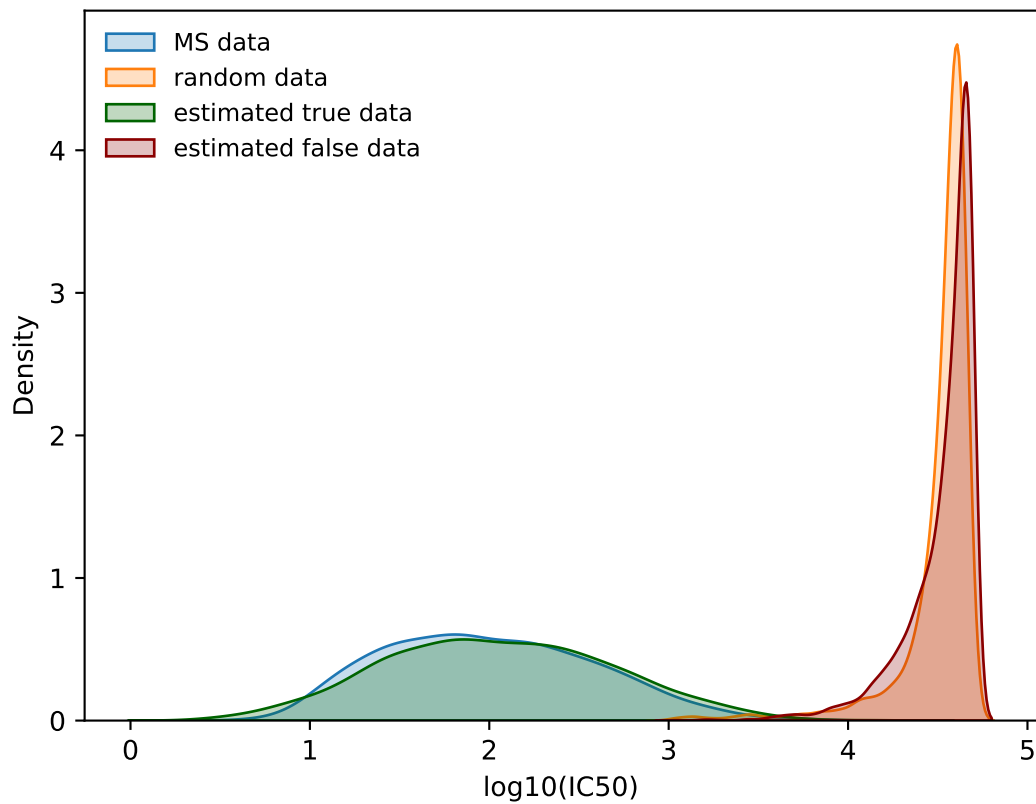

## HLA-B4501

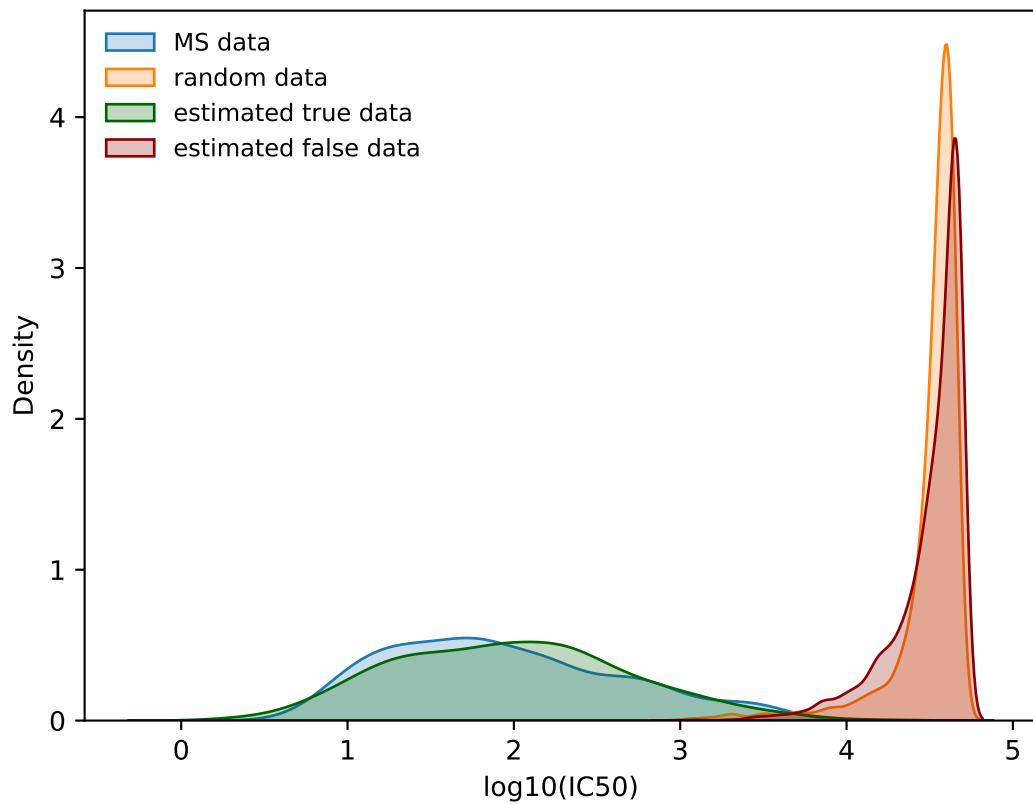

# HLA-B4601

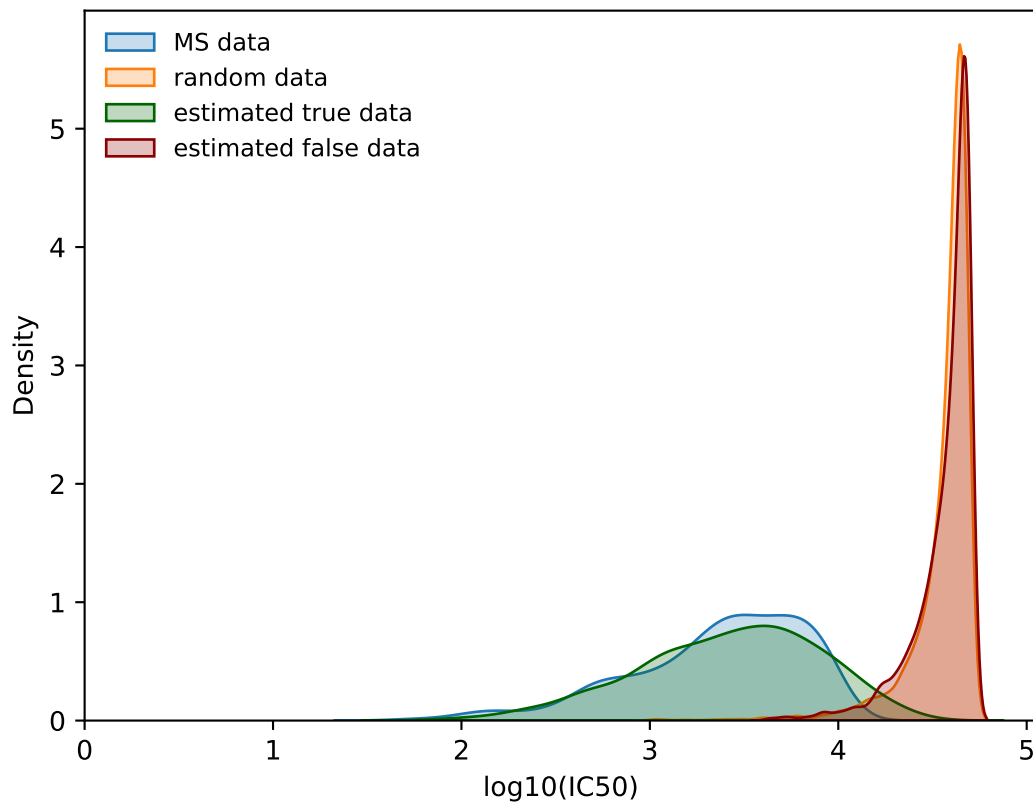

## HLA-B4901

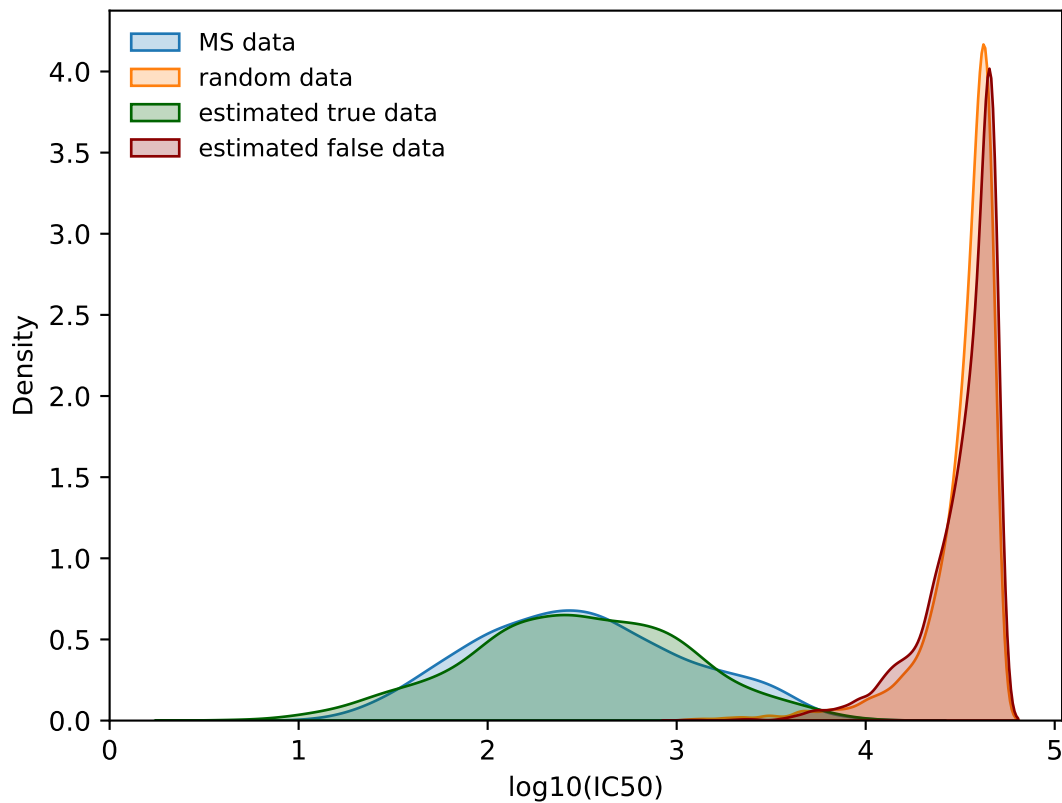

## HLA-B5001

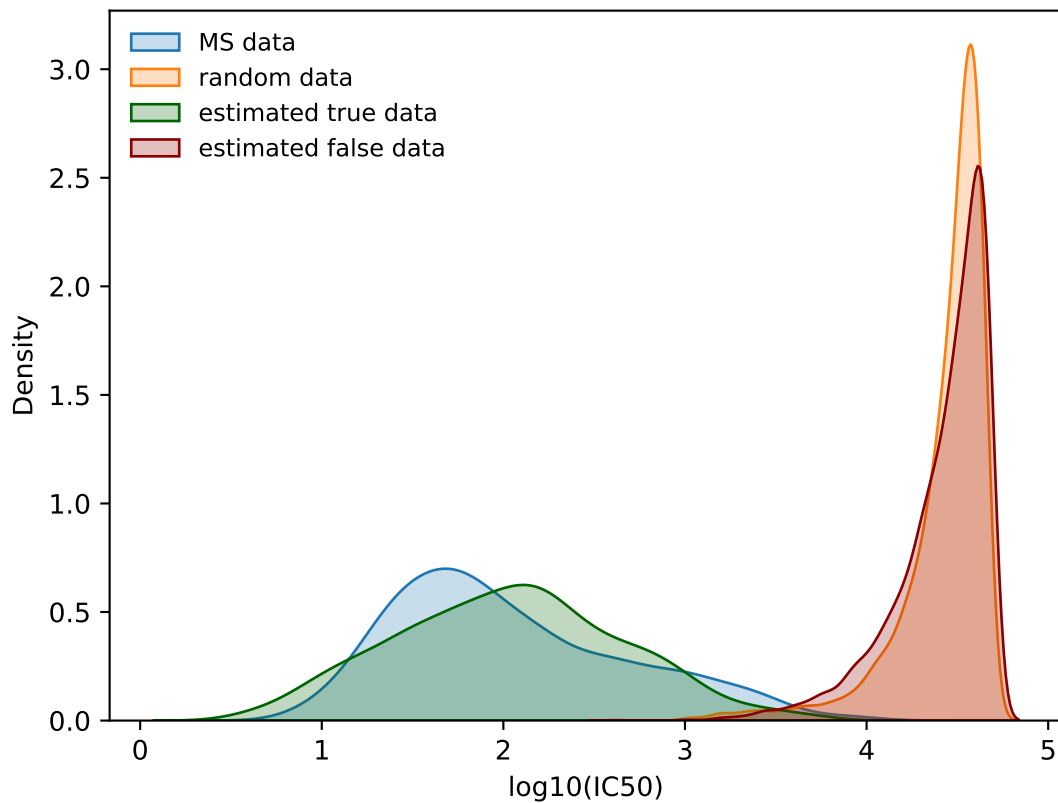

# HLA-B5101

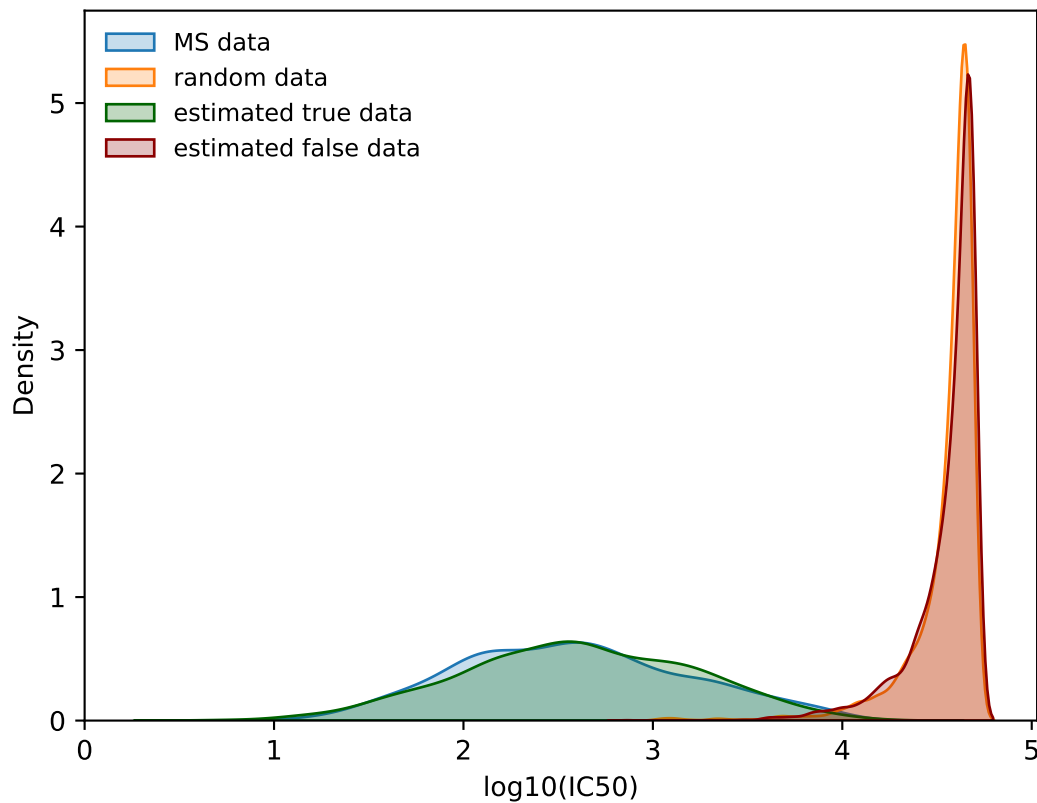

## HLA-B5301

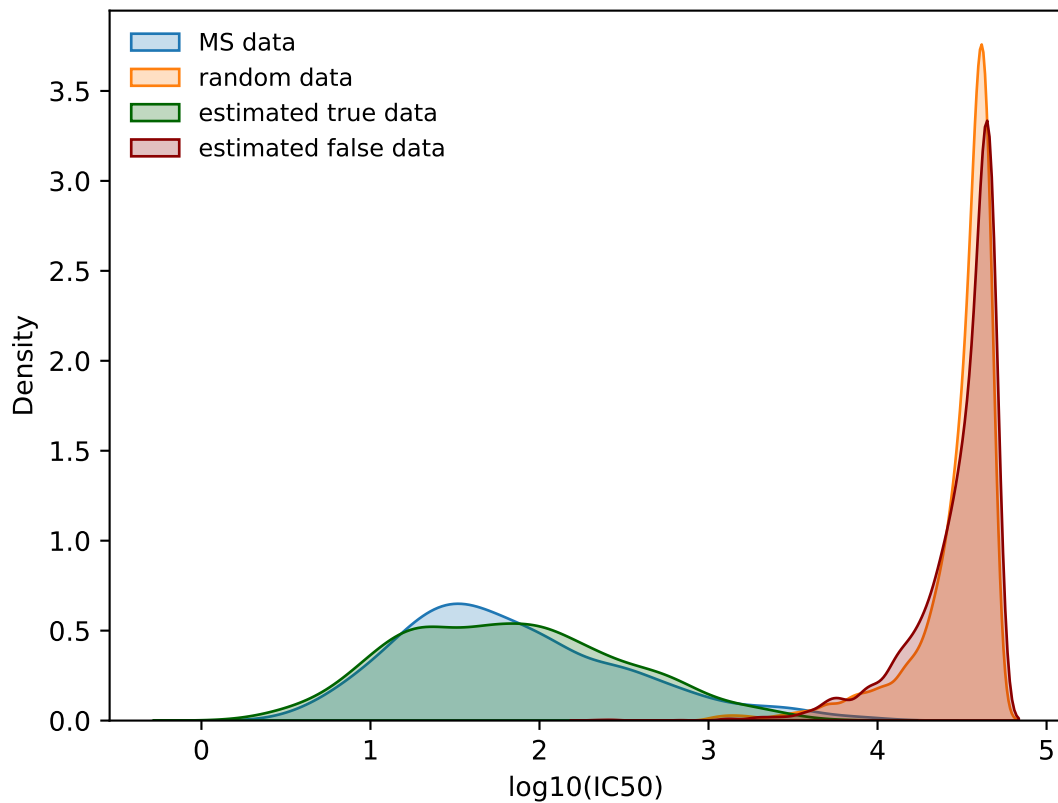

# HLA-B5601

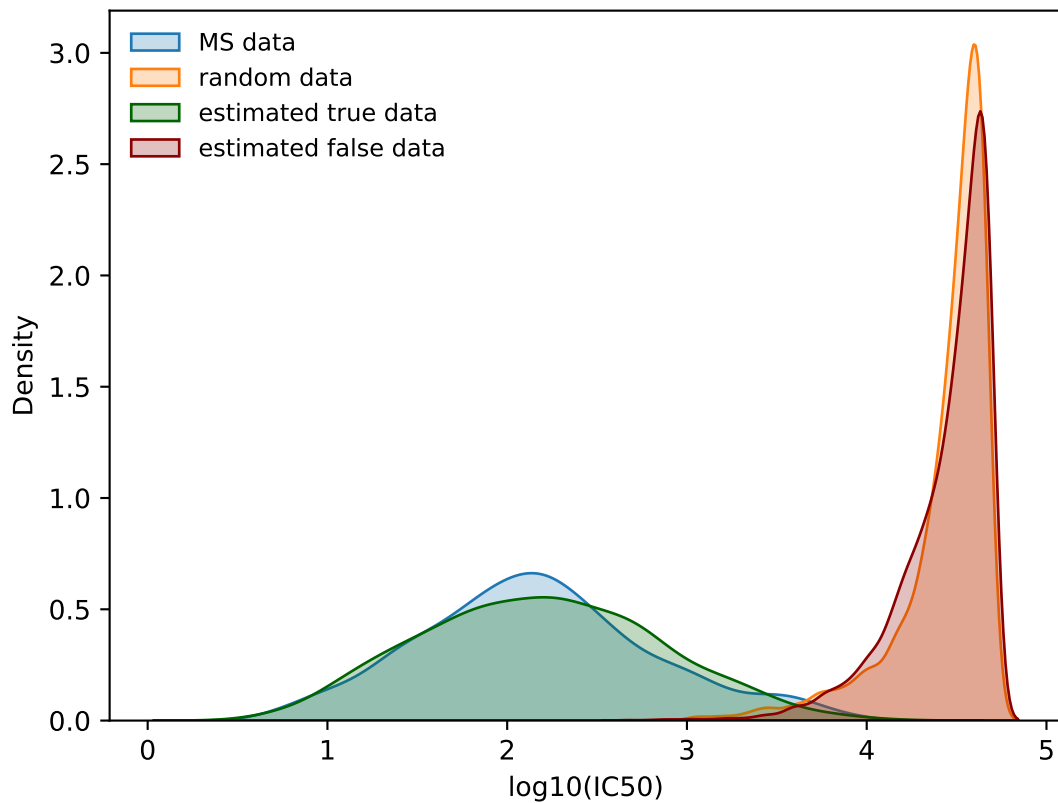

## HLA-B5701

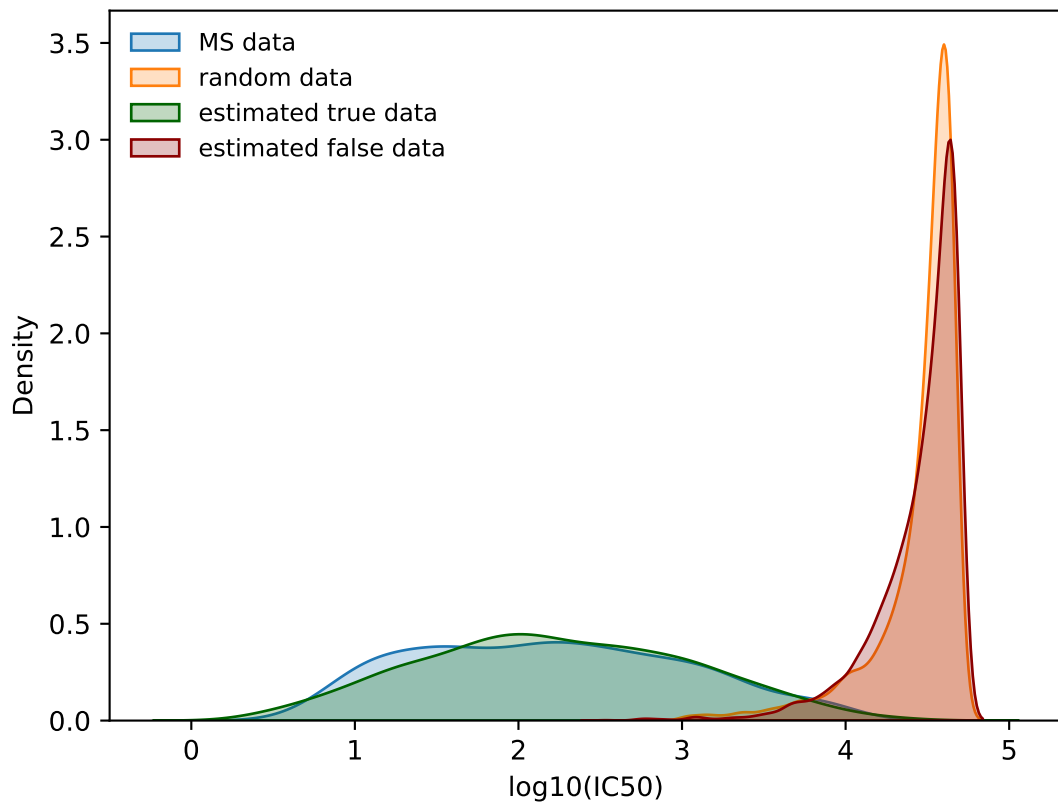

## HLA-B5703

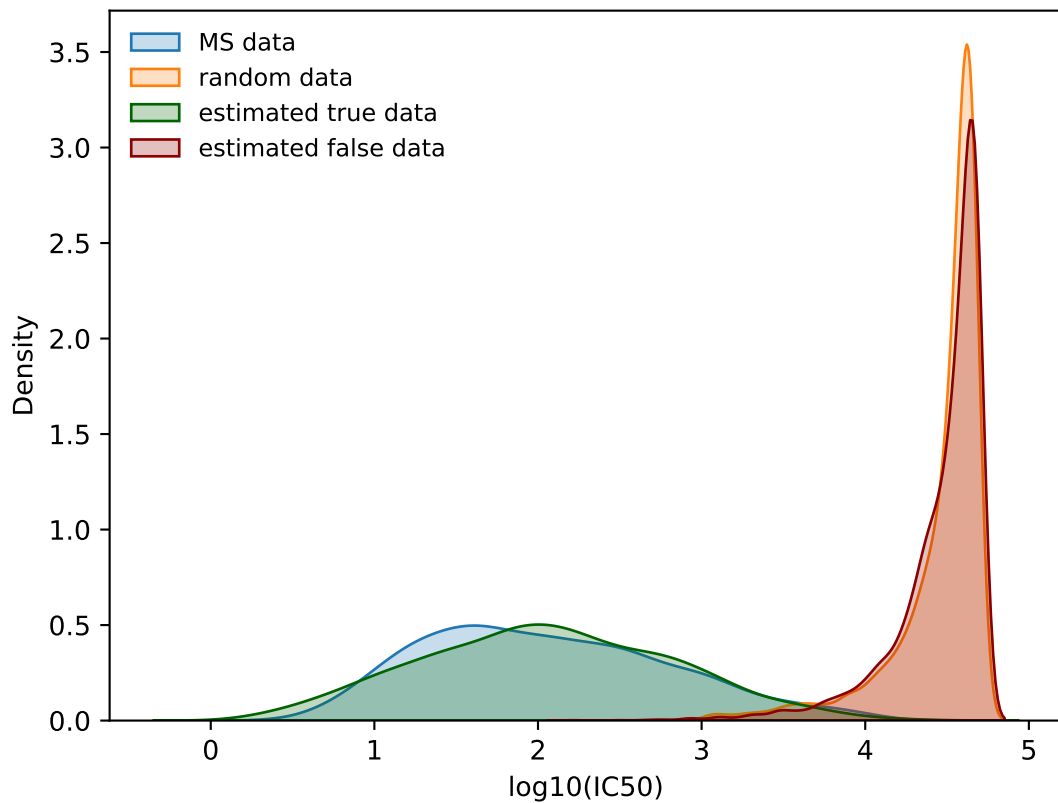

## HLA-B5801

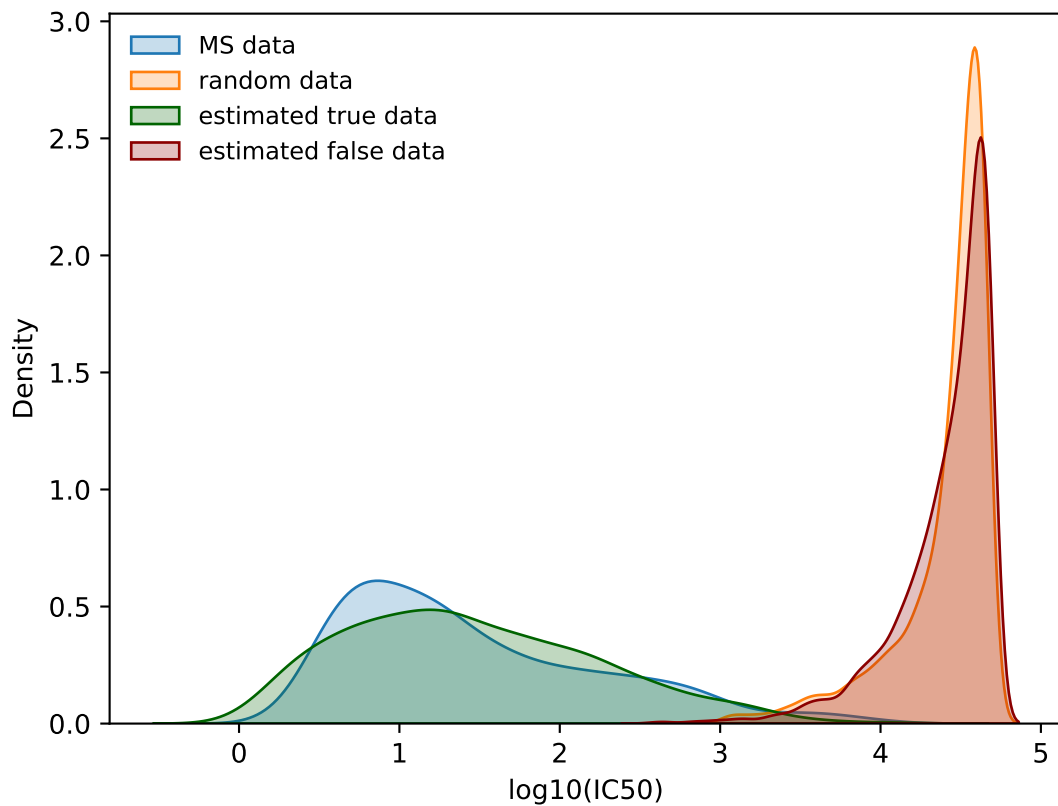

## HLA-C0102

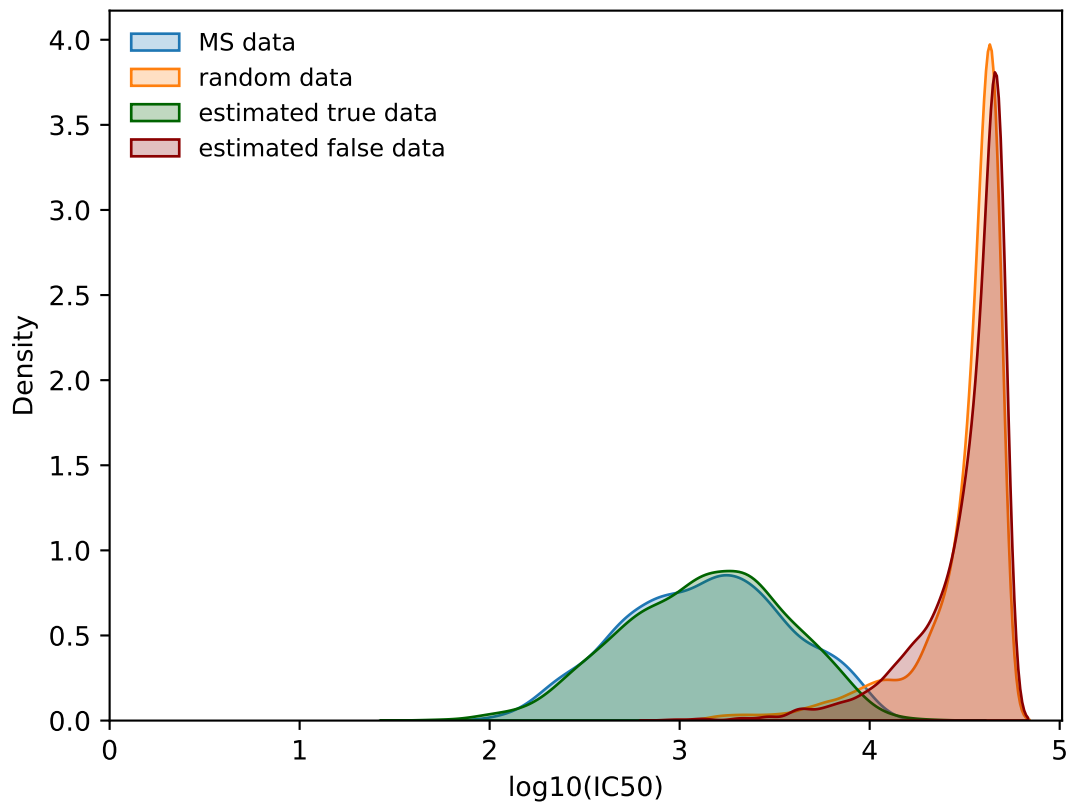

## HLA-C0202

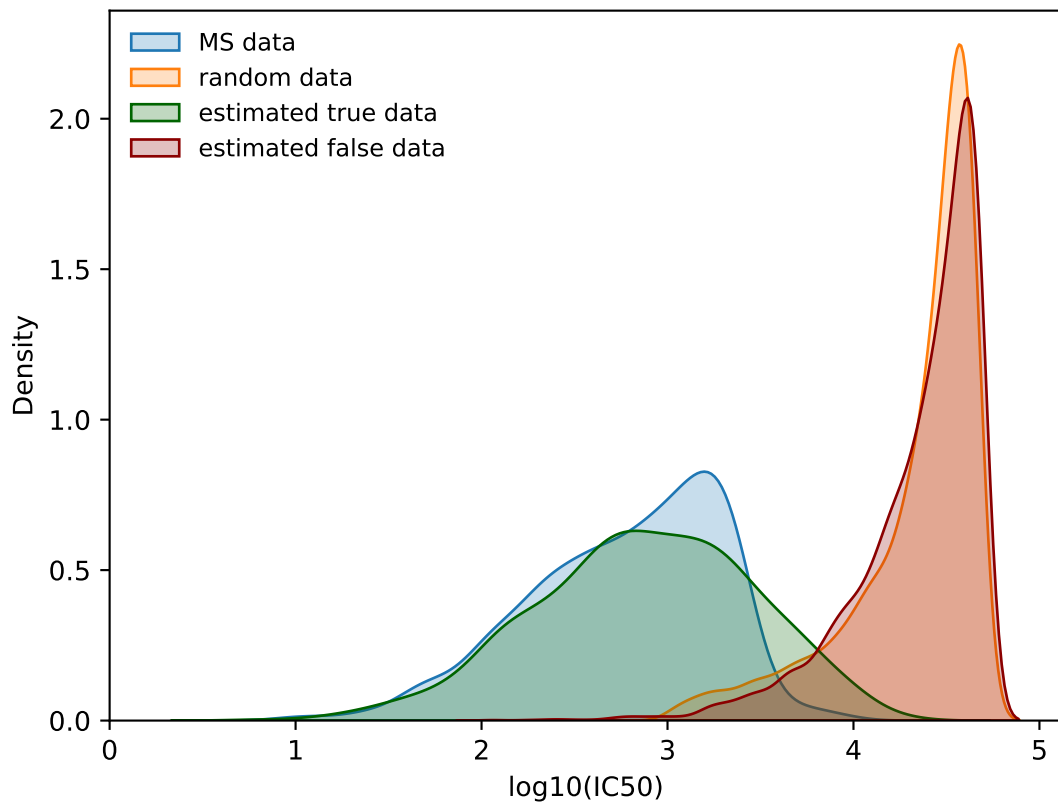

# HLA-C0303

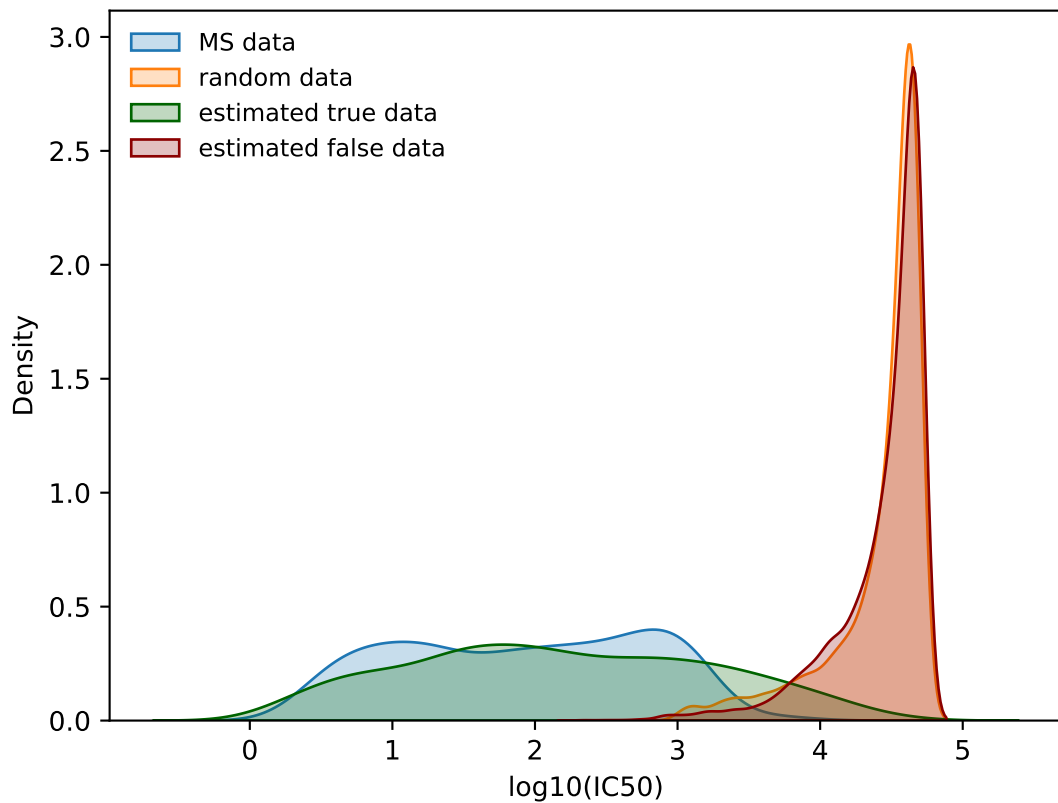

# HLA-C0304

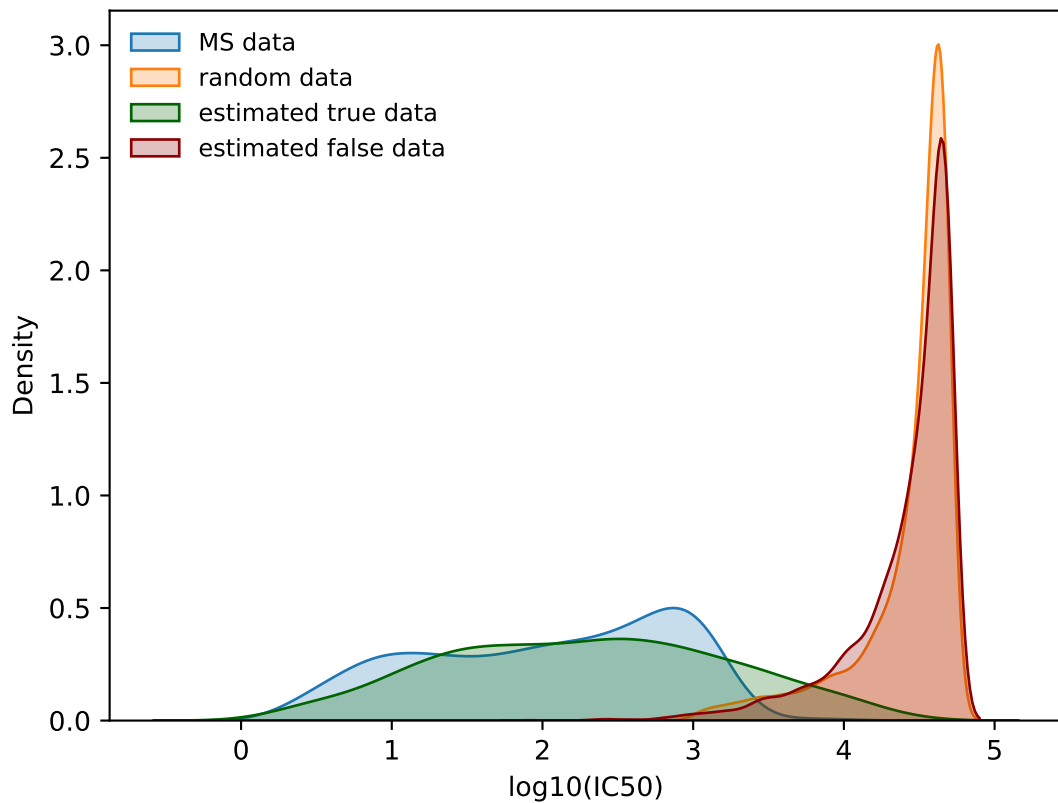

# HLA-C0401

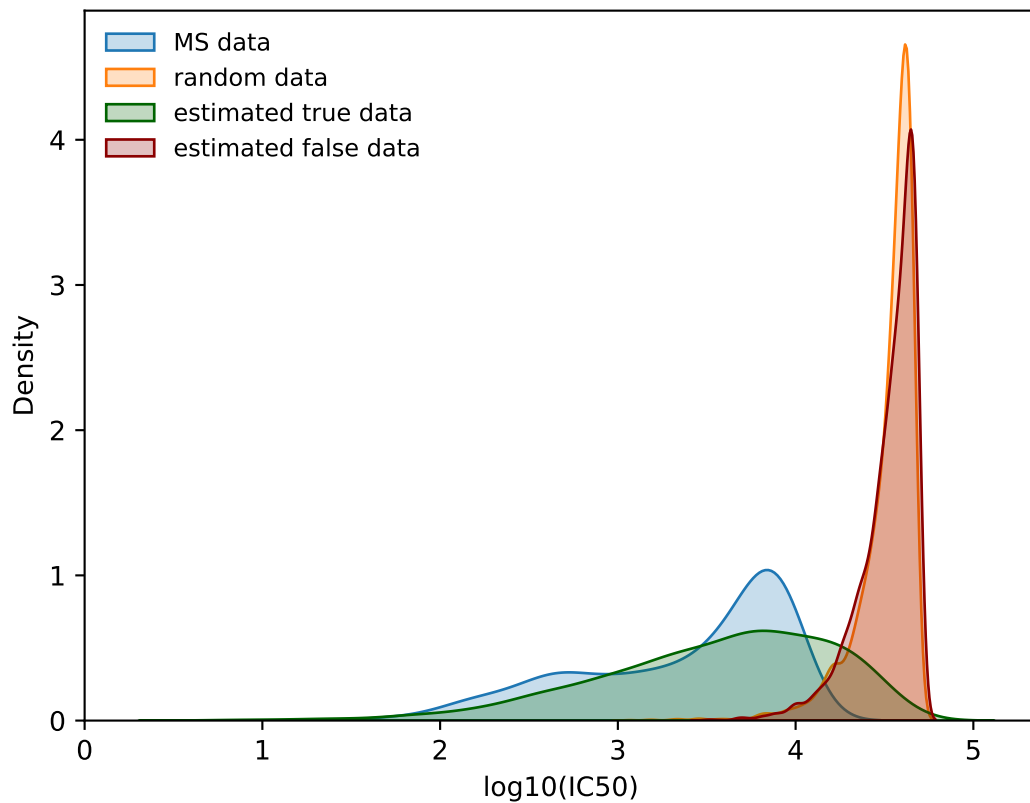

# HLA-C0501

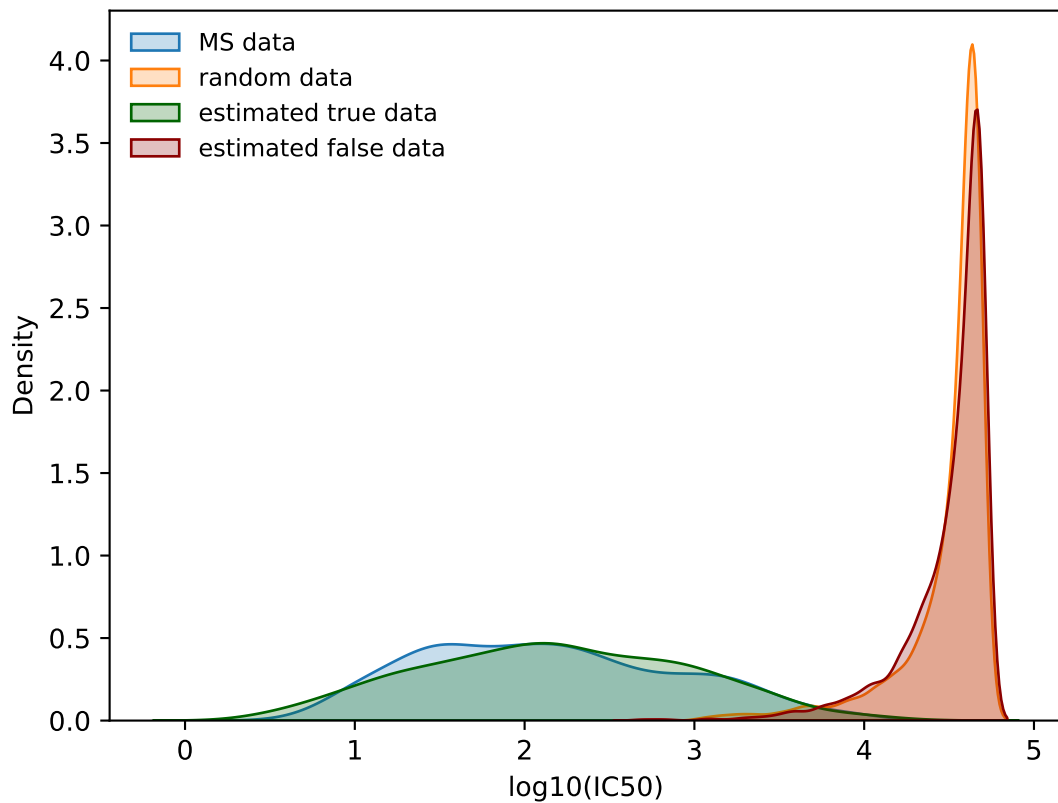

## HLA-C0602

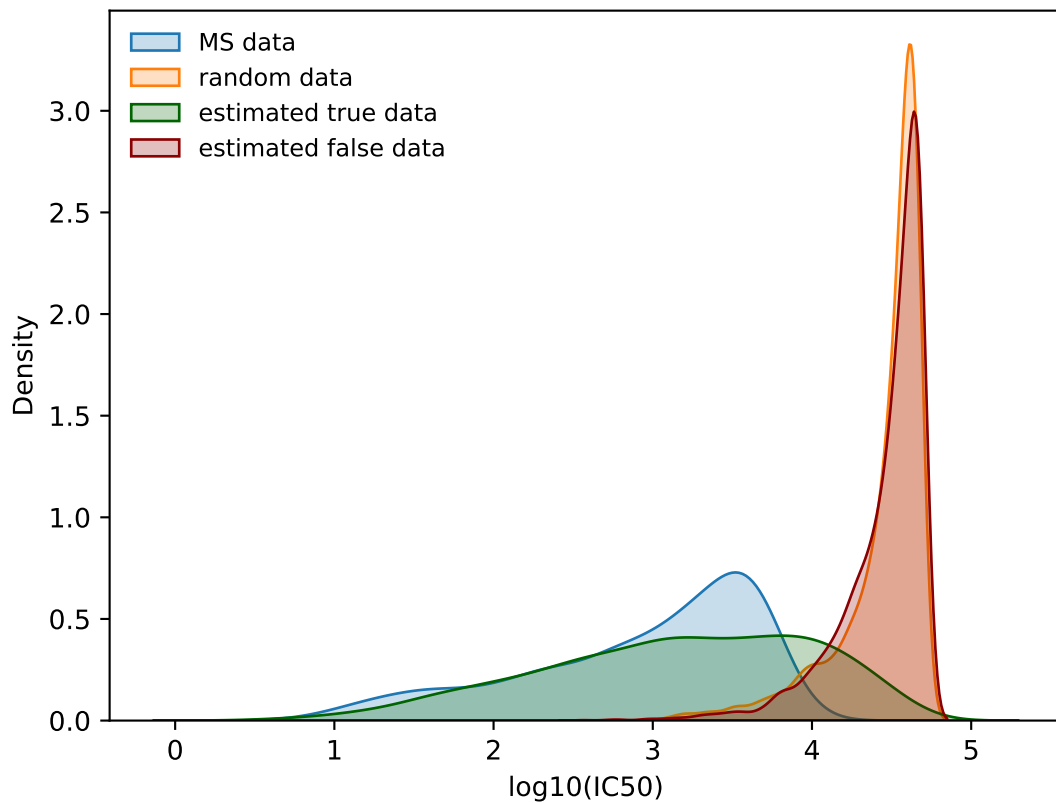

# HLA-C0701

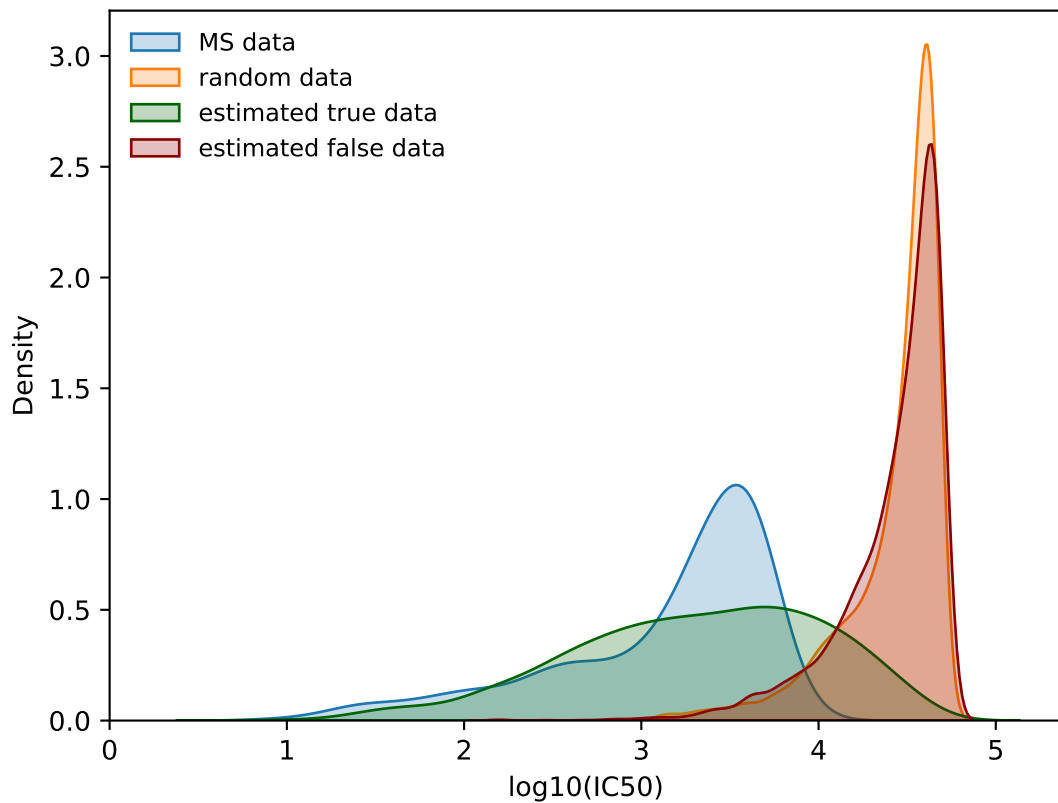

## HLA-C0702

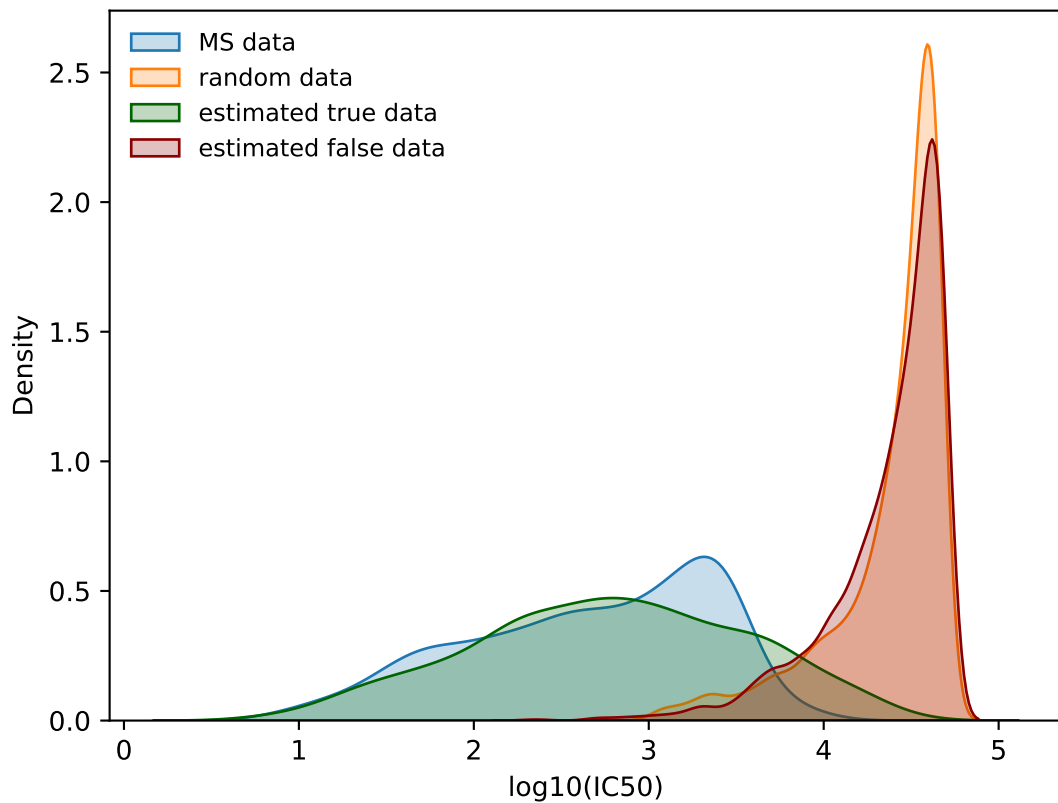

# HLA-C0704

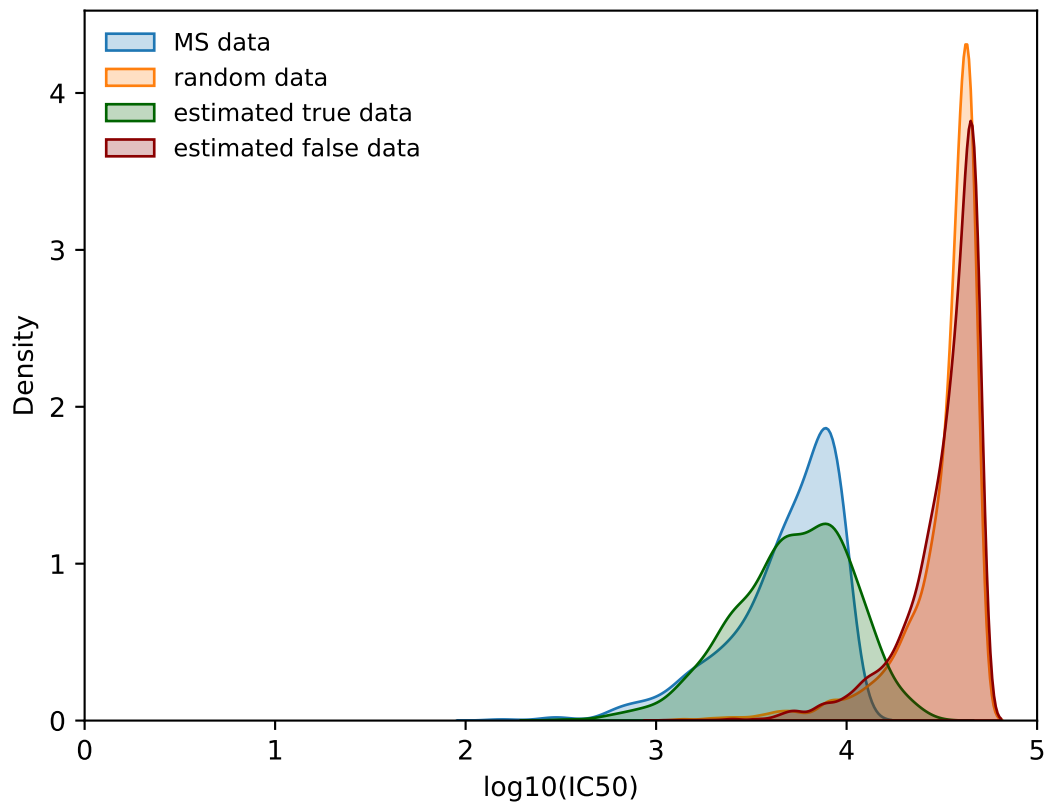

# HLA-C0801

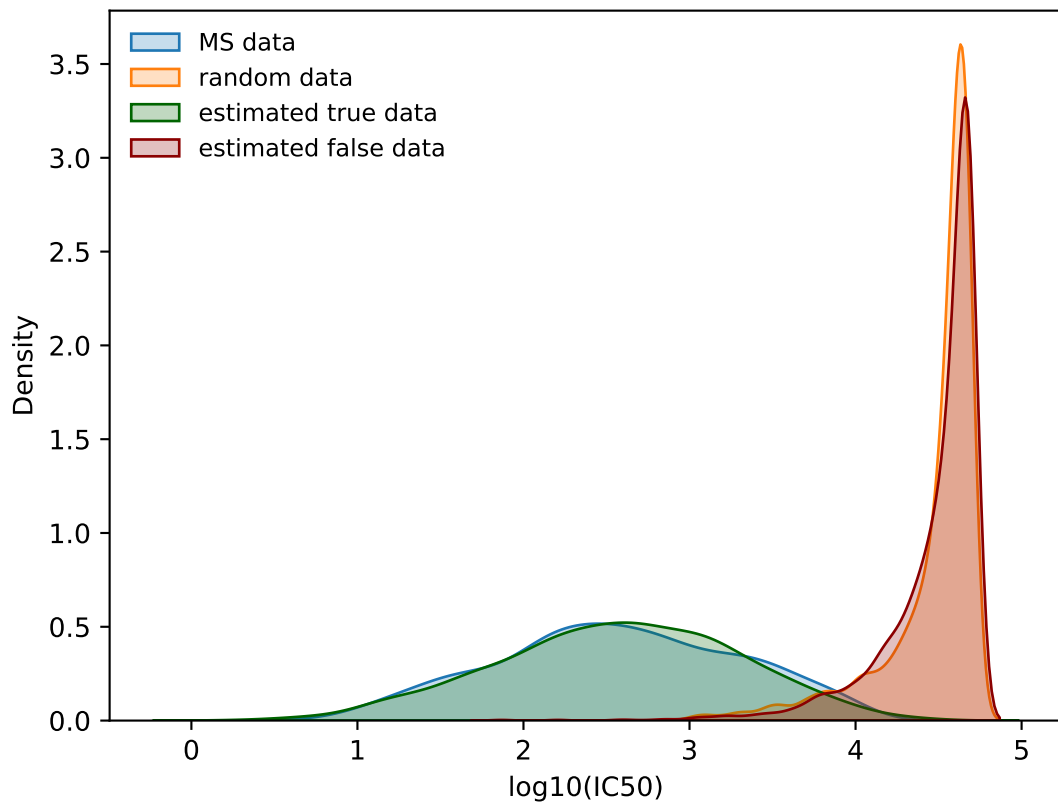

## HLA-C0802

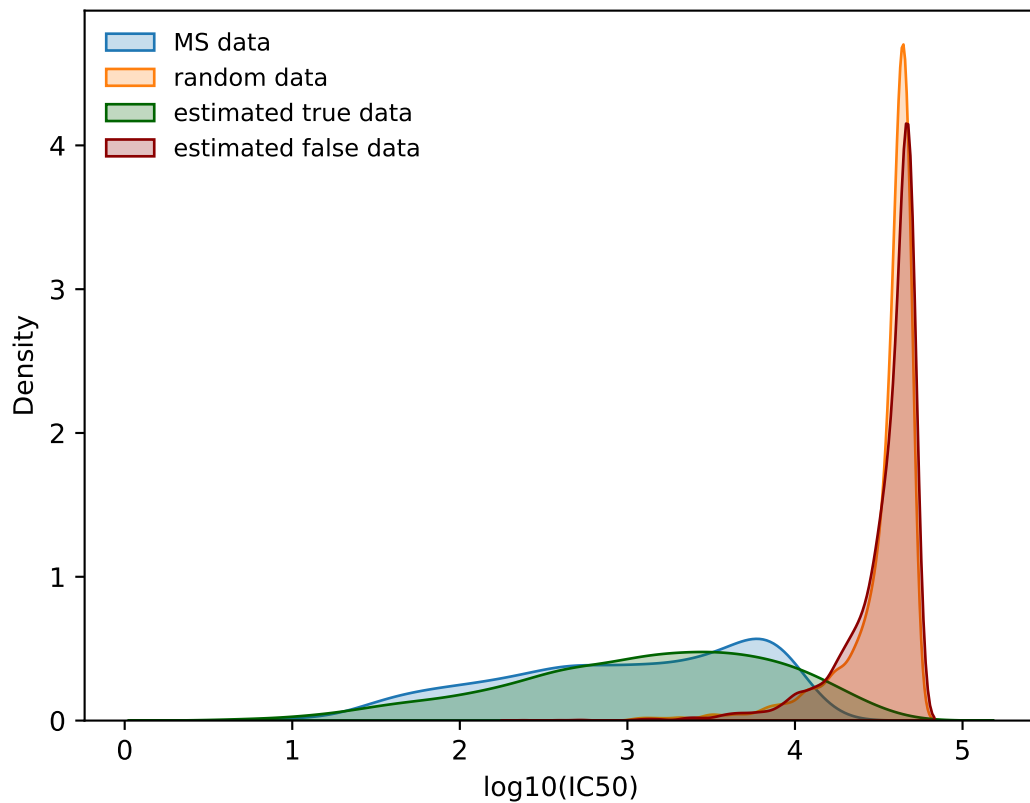

## HLA-C1202

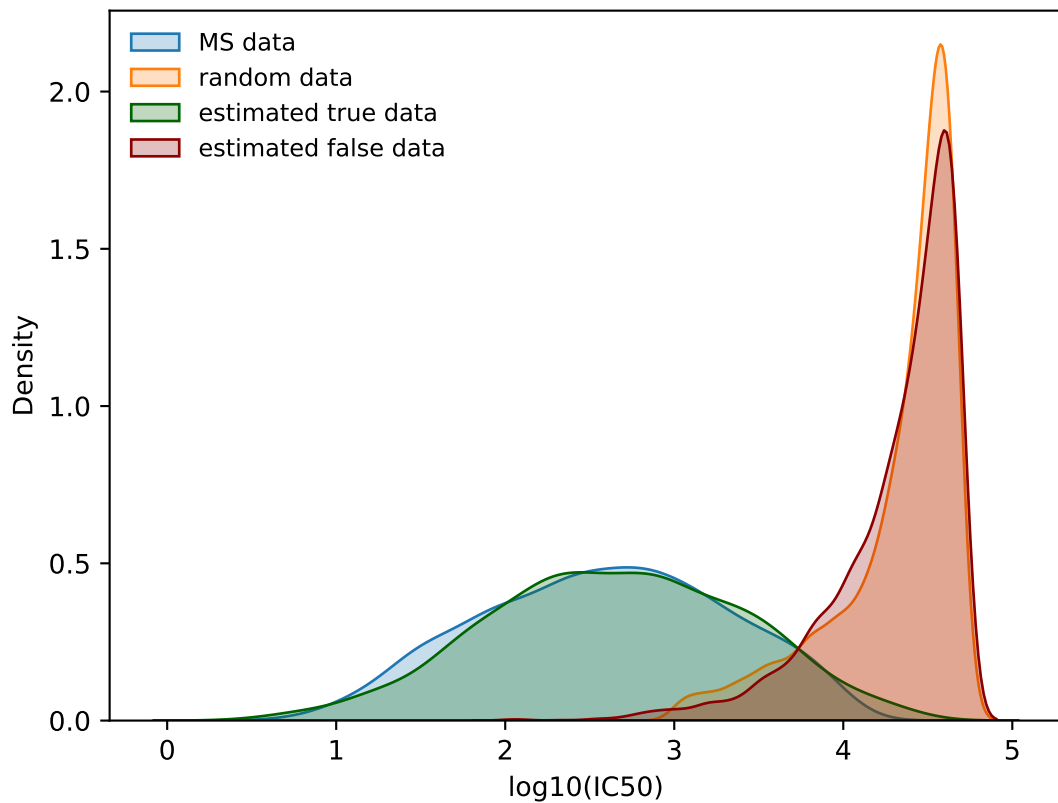

## HLA-C1203

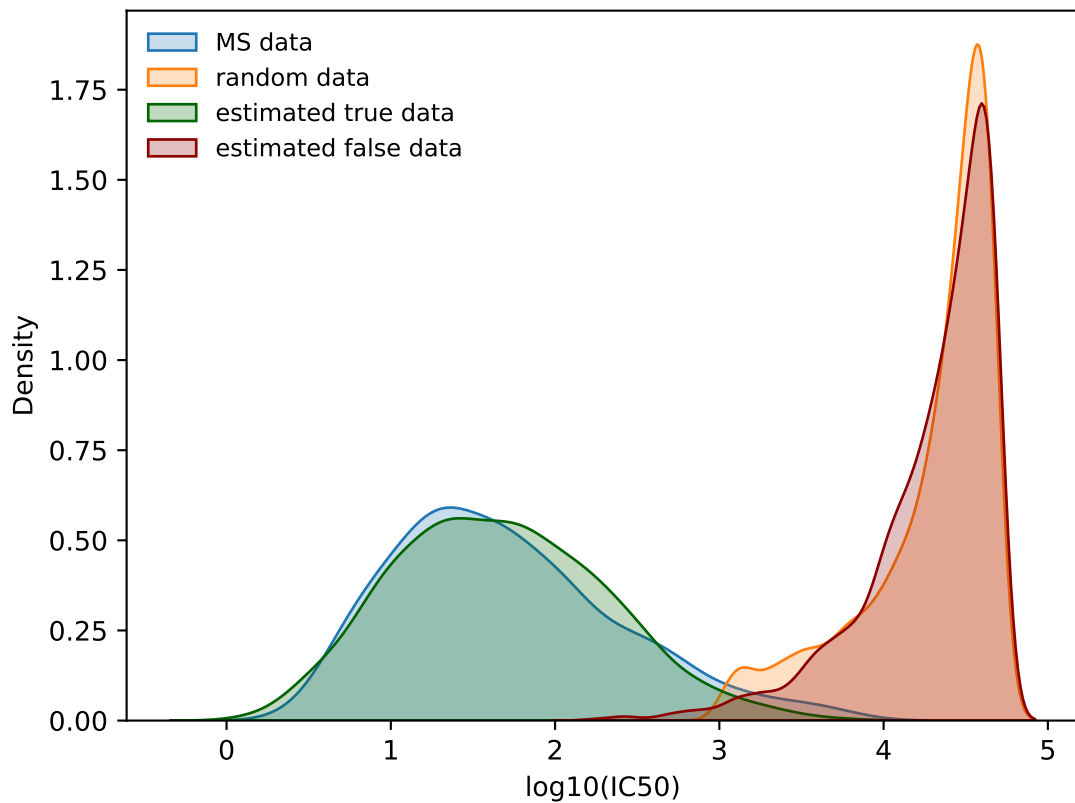

## HLA-C1402

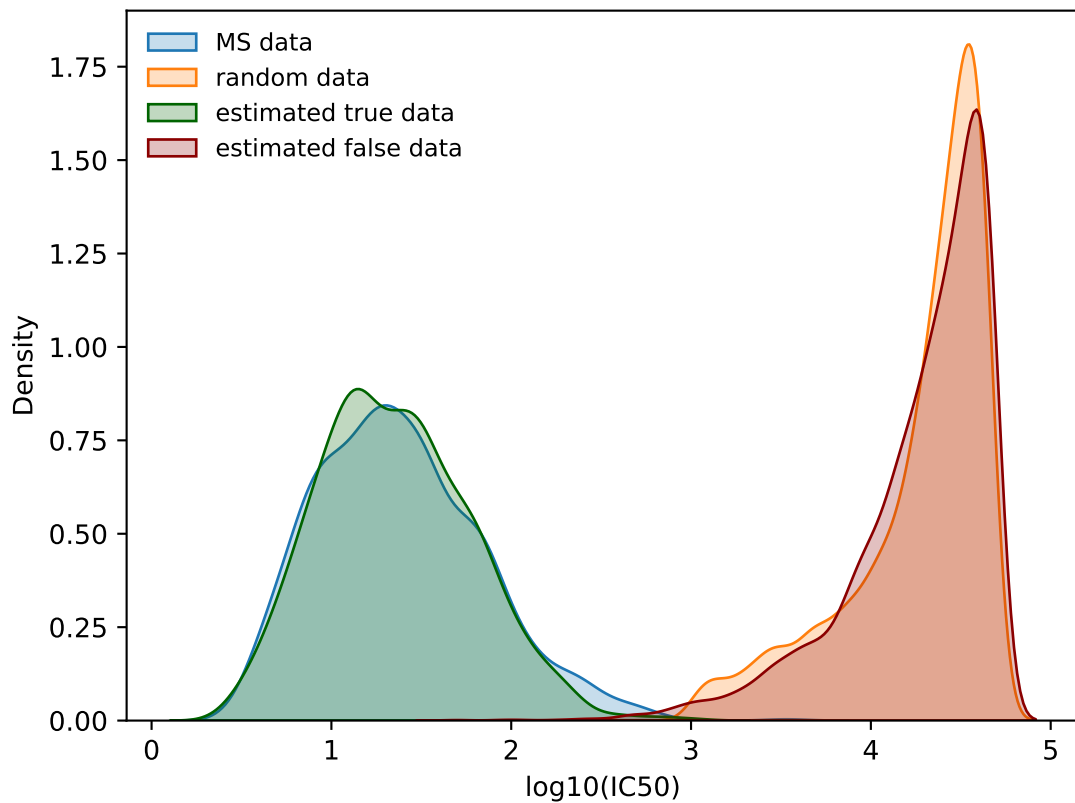

# HLA-C1403

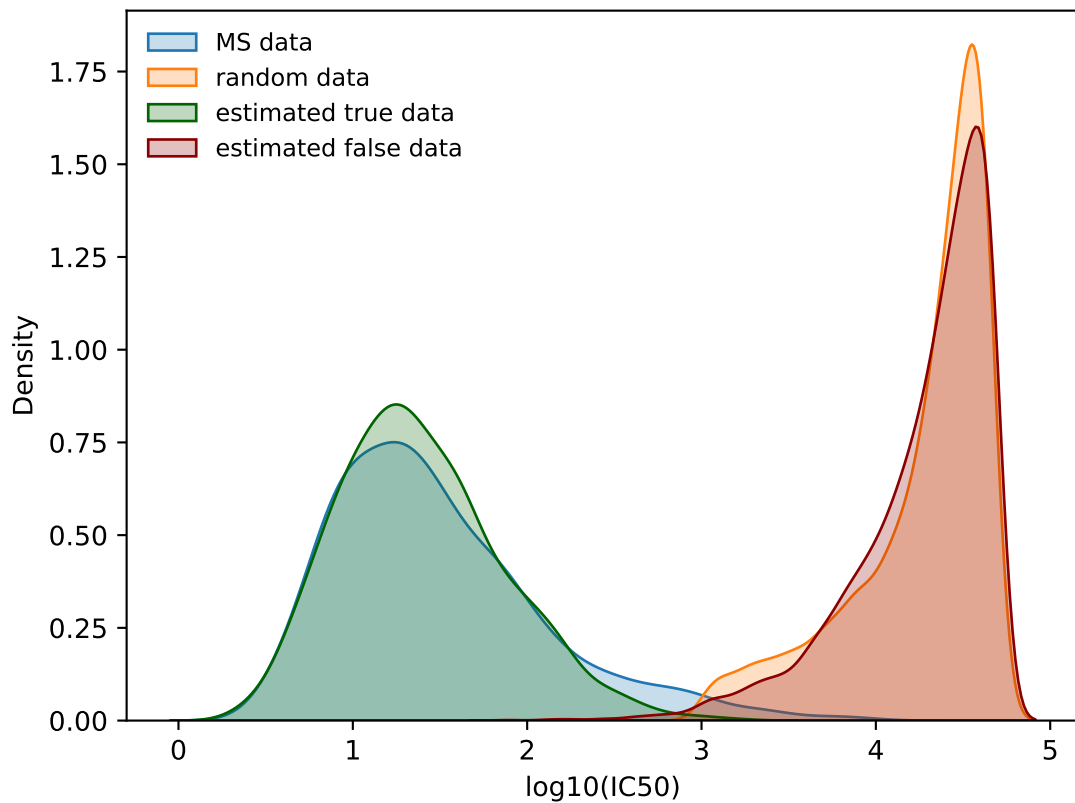

## HLA-C1502

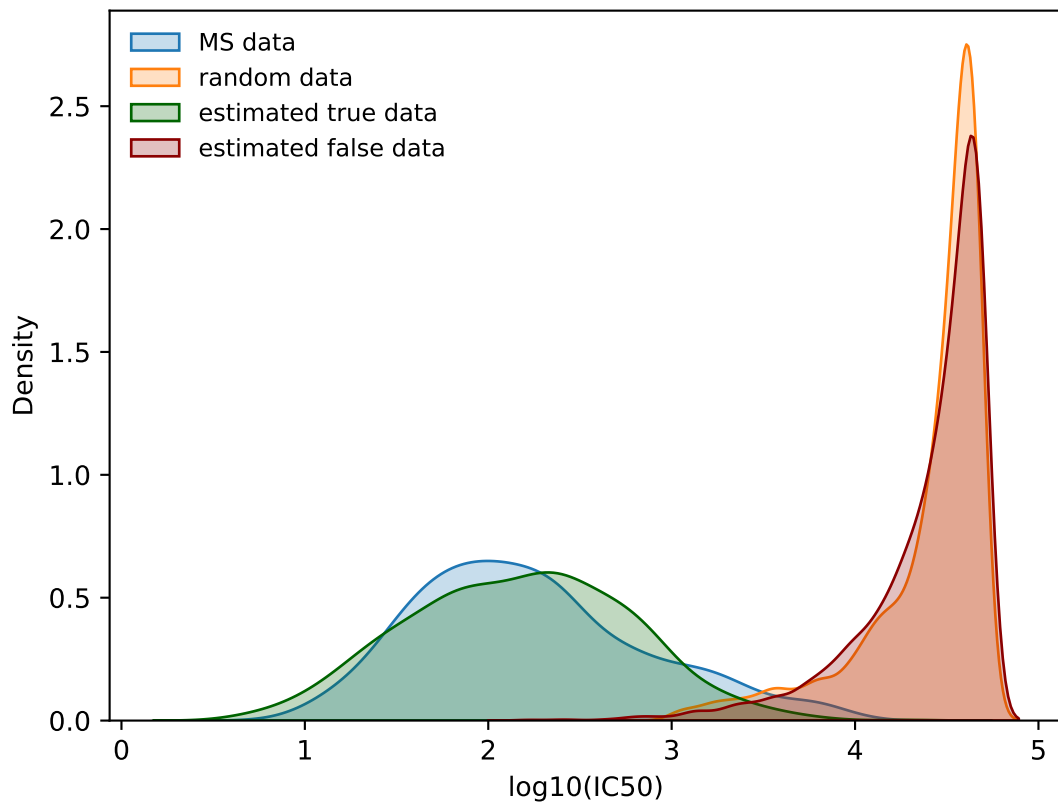

# HLA-C1601

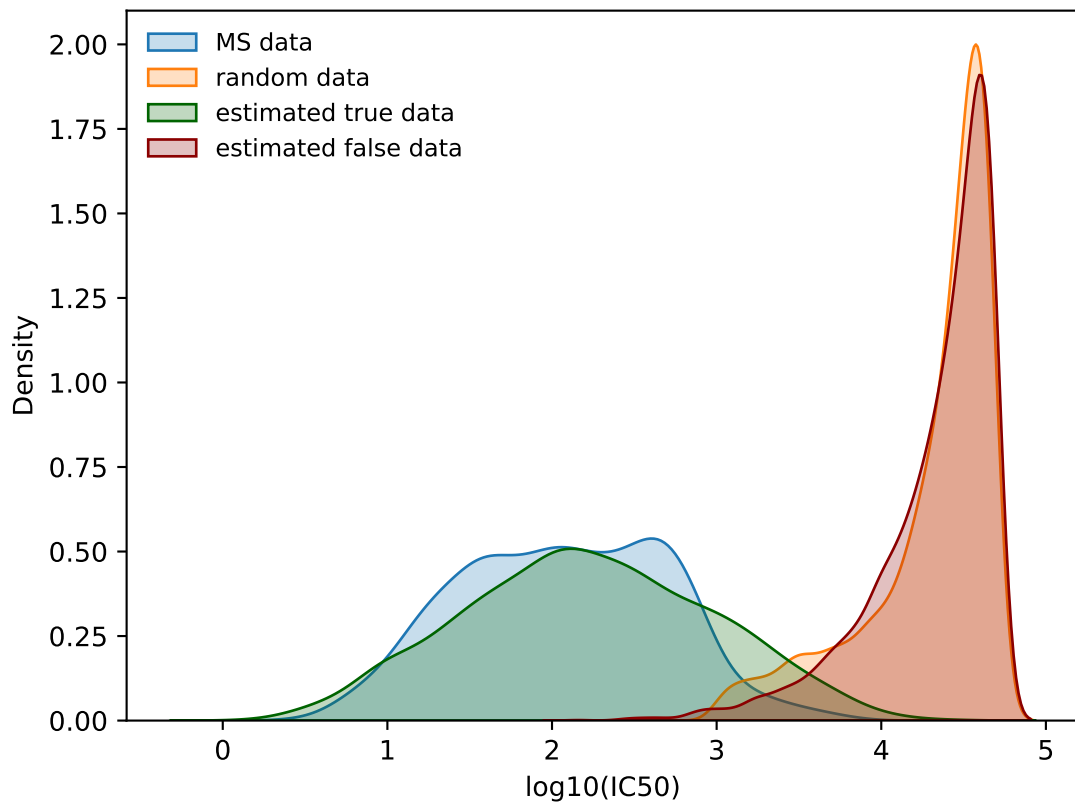

# HLA-C1701

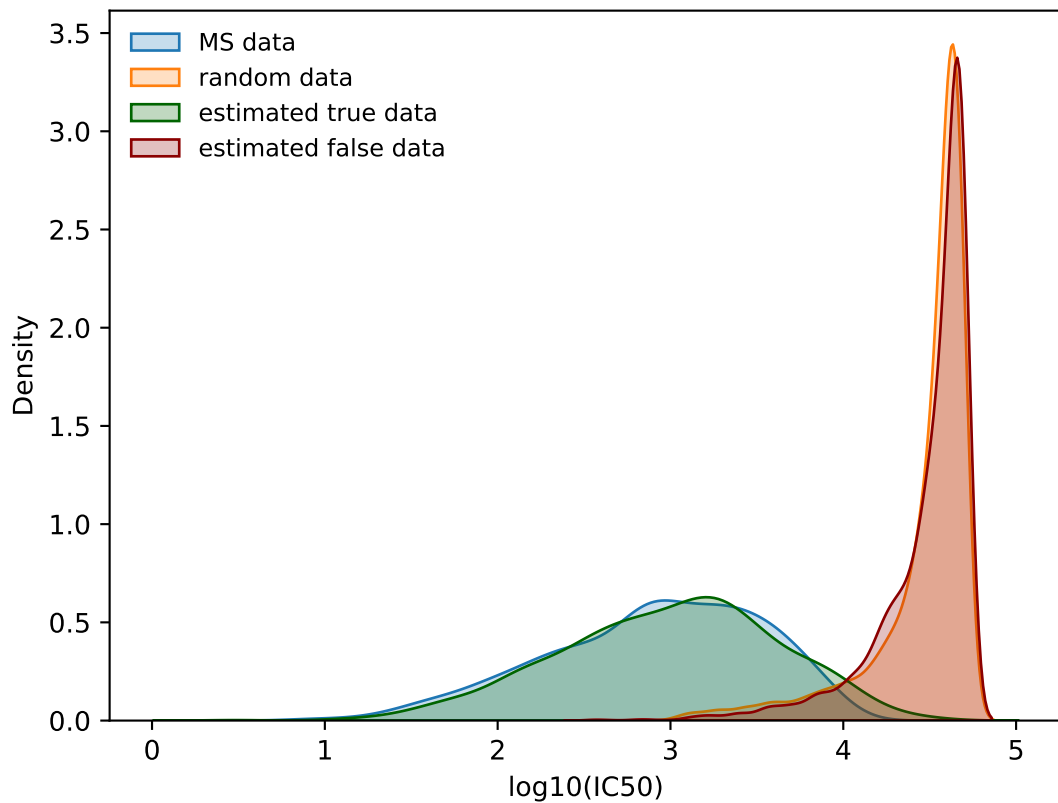

Supplement: btab479_Supplementary_Data [file btab479_supplementary_data.zip › supplementary_data2.pdf]
