# Supplementary material for: MHCVision: estimation of global and local false discovery rate for MHC class I peptide binding prediction
Source: Bioinformatics. 2021 Jul 1;37(21):3830–8. doi: 10.1093/bioinformatics/btab479 (PMC8570816; doi:10.1093/bioinformatics/btab479)

# HLA-A0101

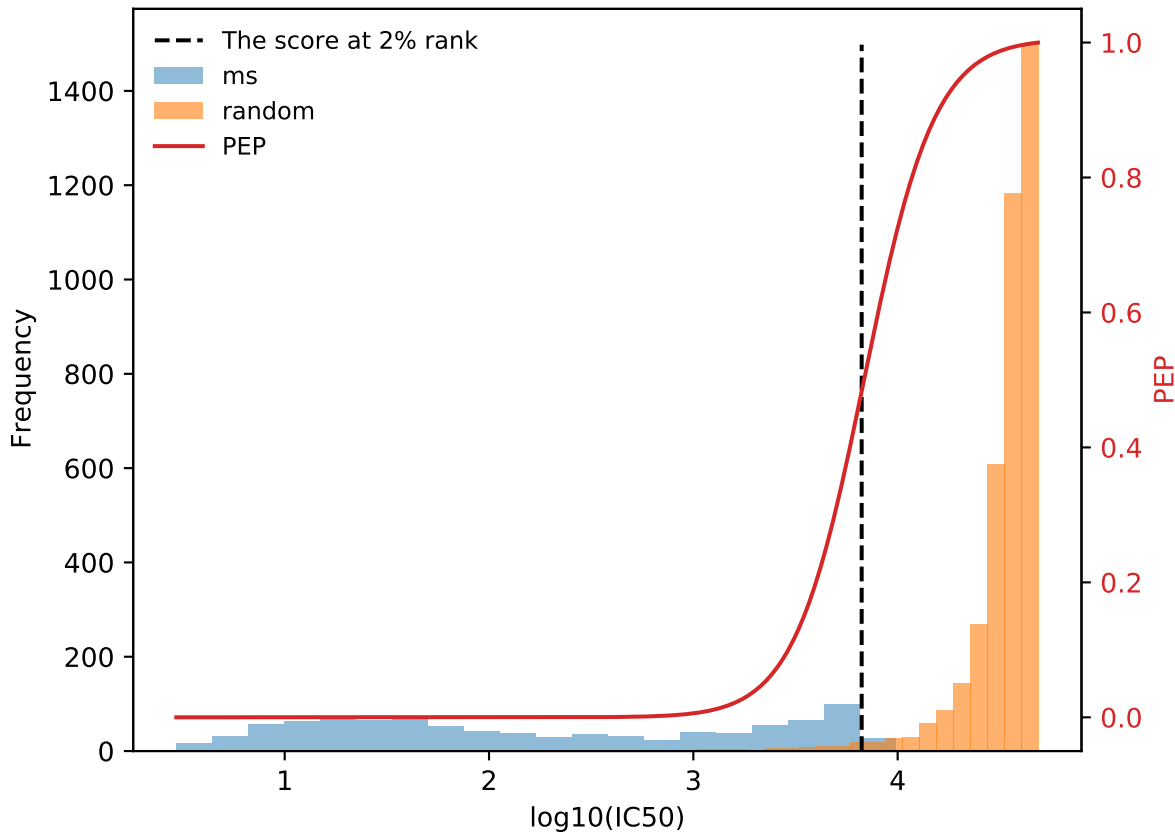

# HLA-A0202

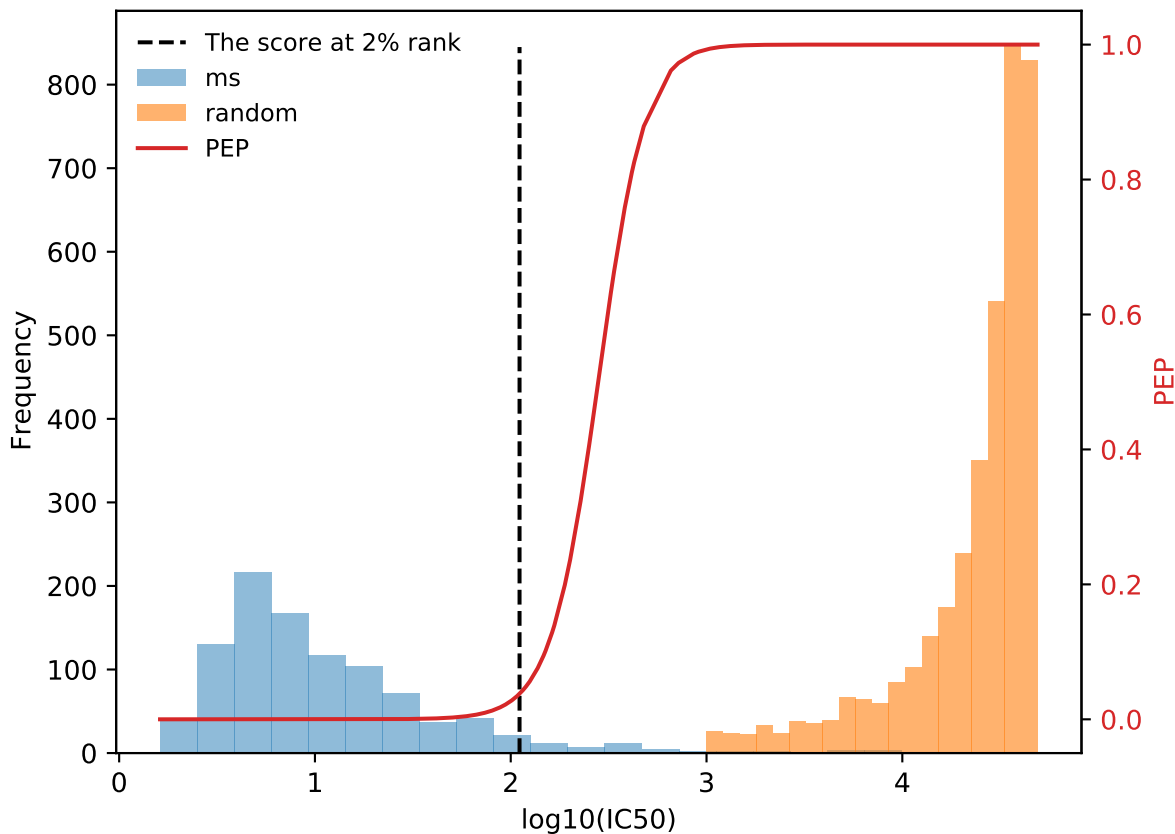

# HLA-A0207

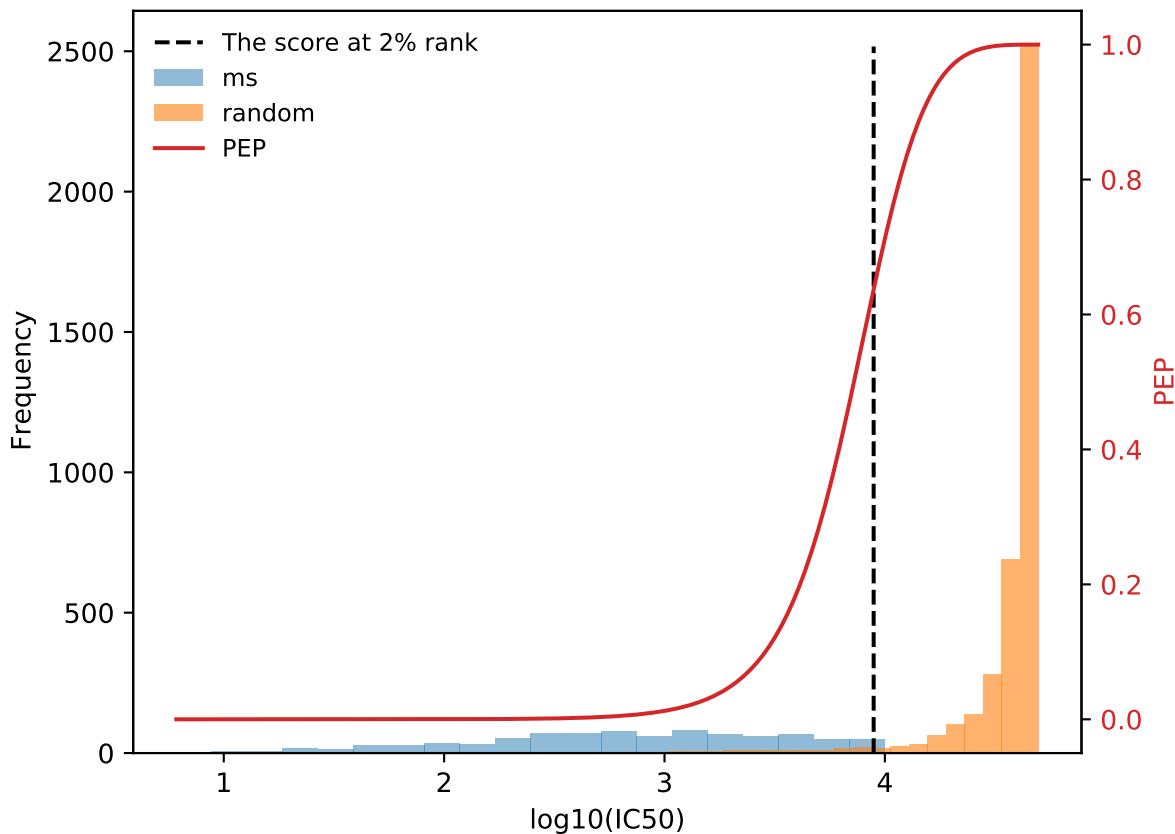

# HLA-A0211

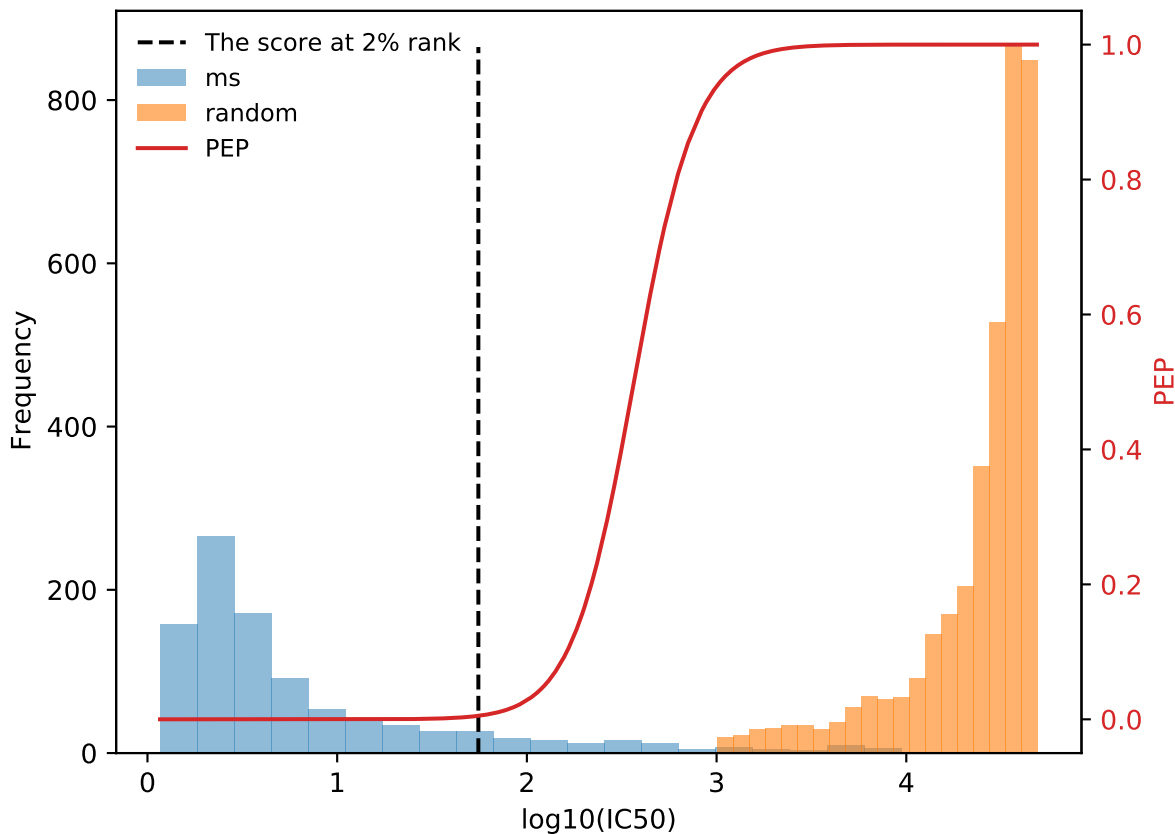

# HLA-A2902

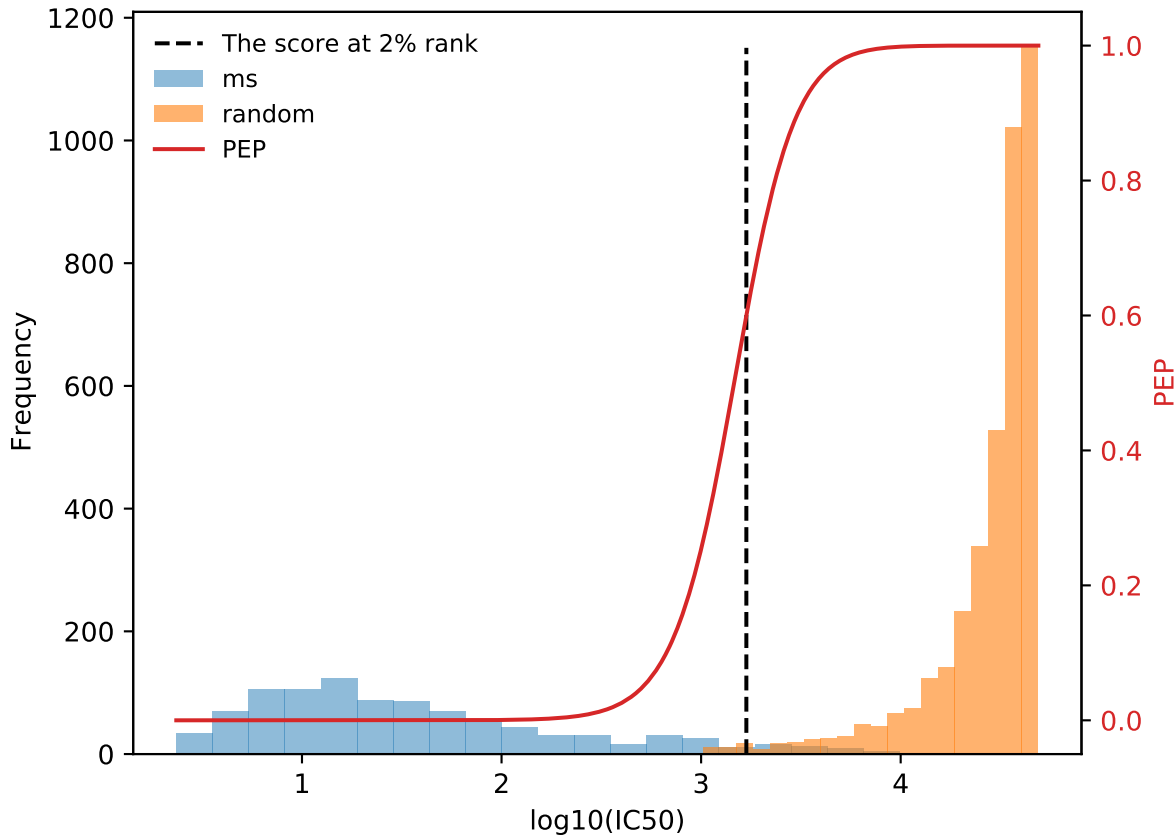

# HLA-A3303

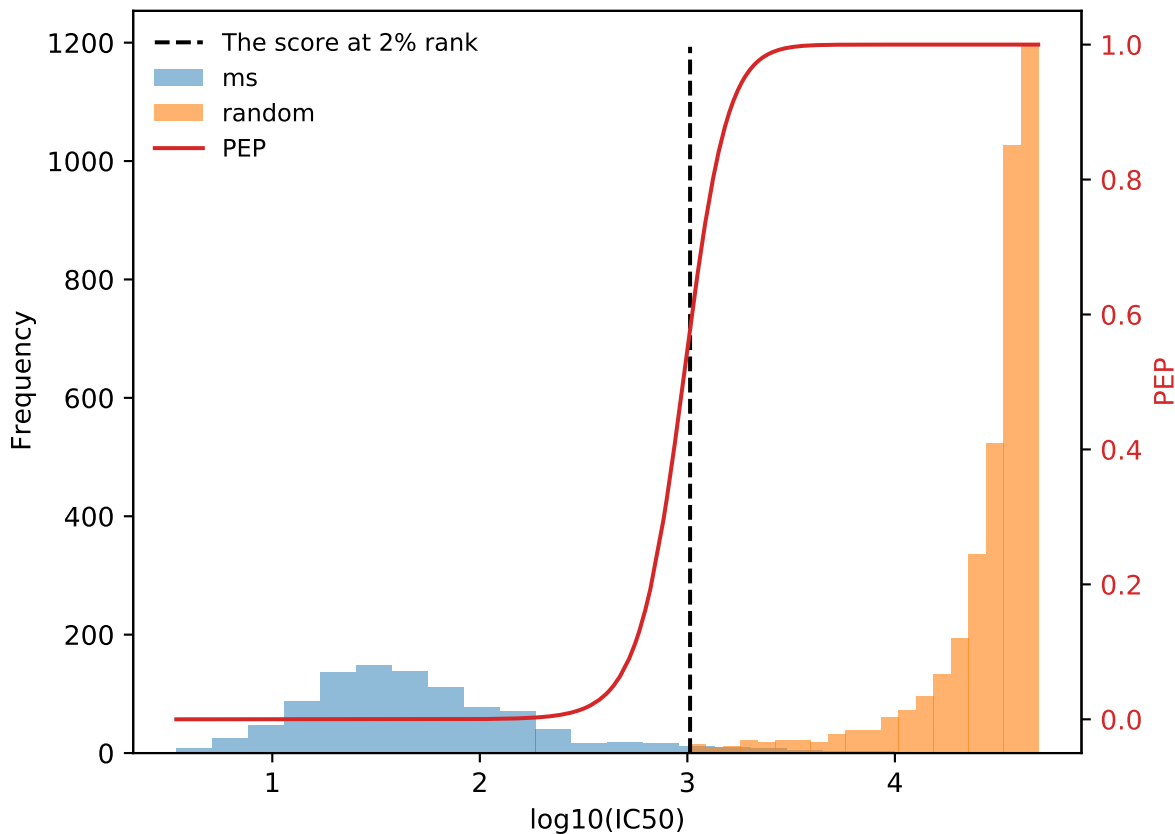

# HLA-B1402

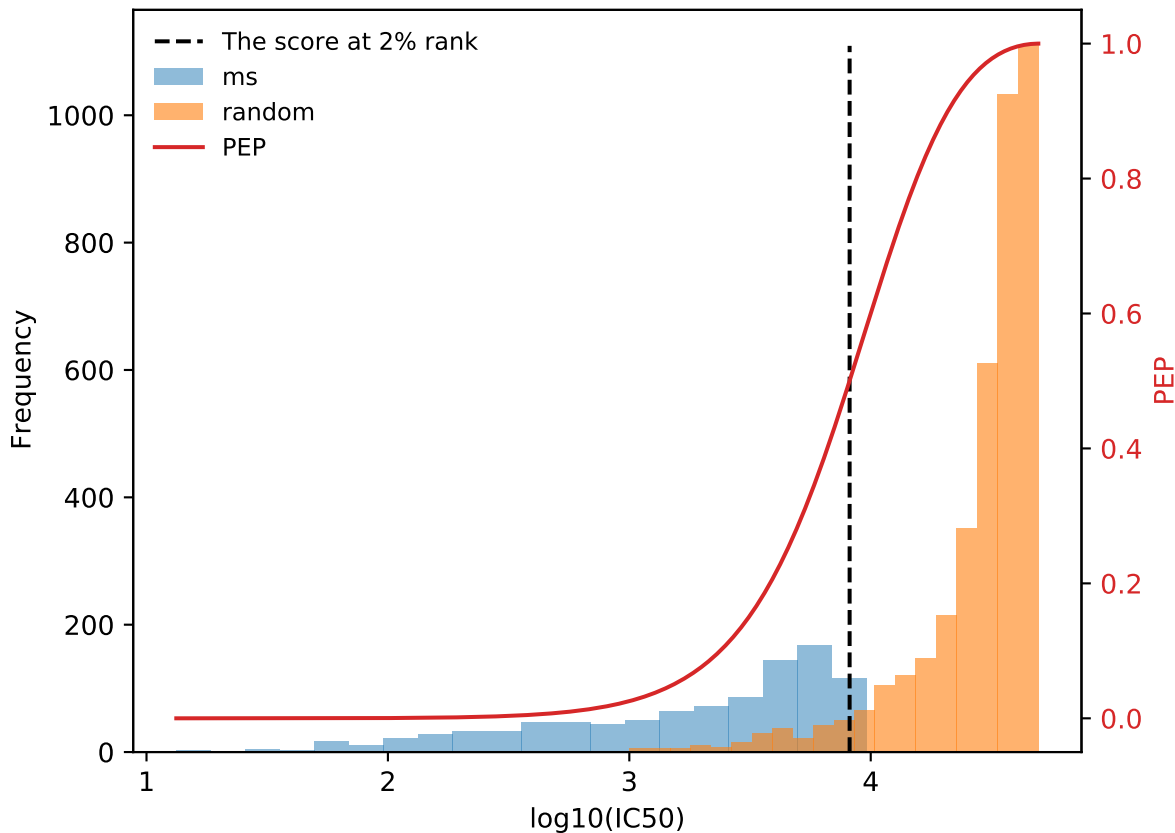

# HLA-B1510

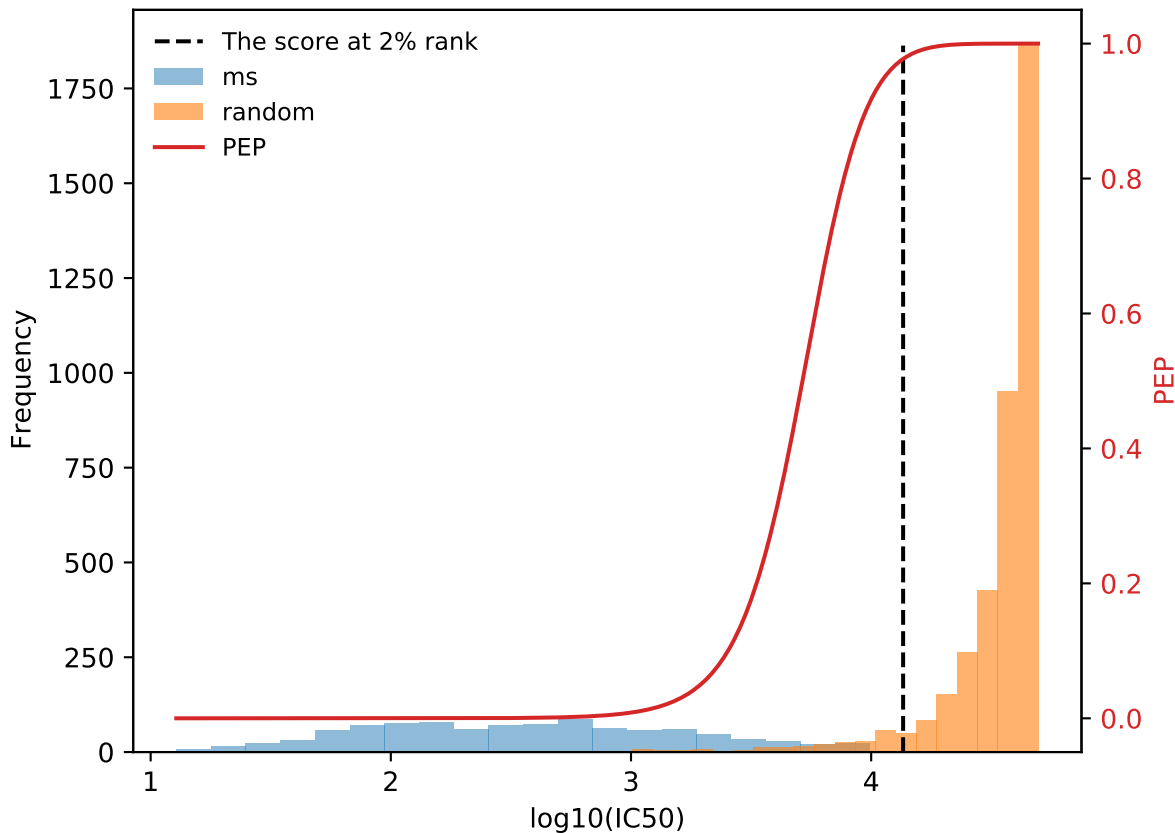

# HLA-B1517

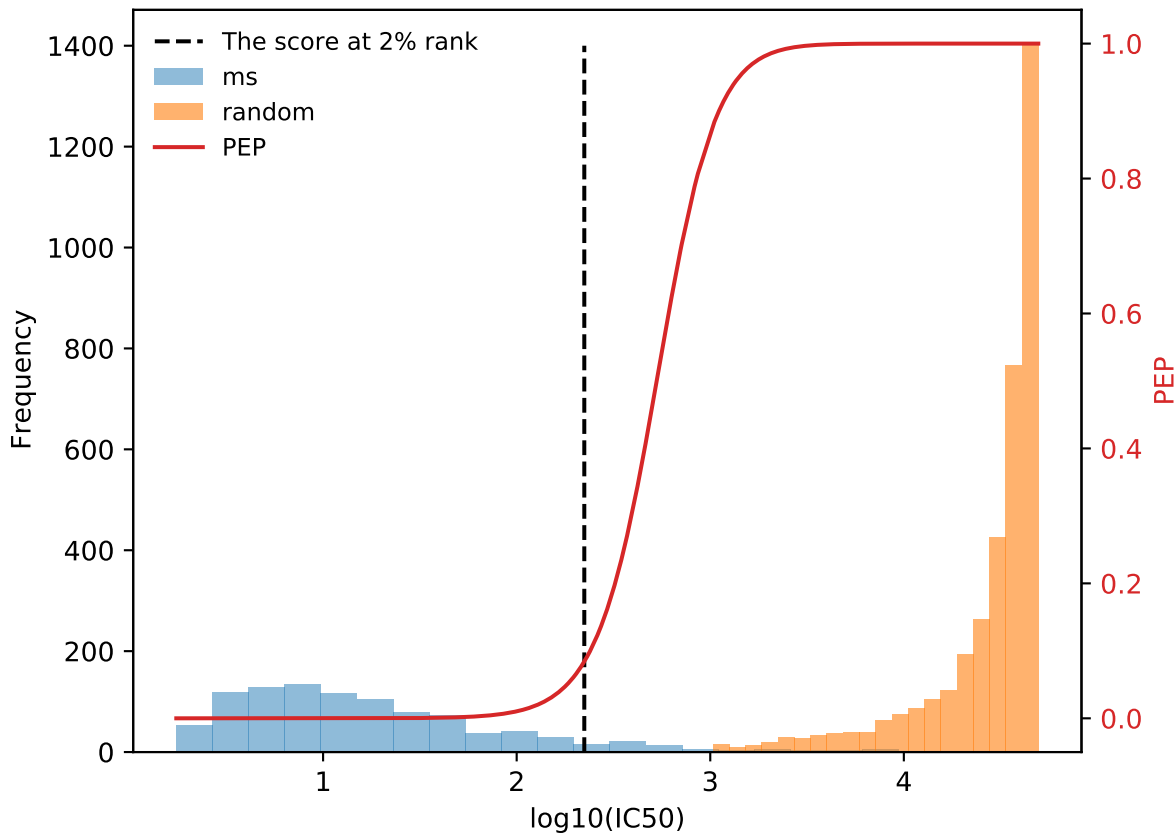

# HLA-B2702

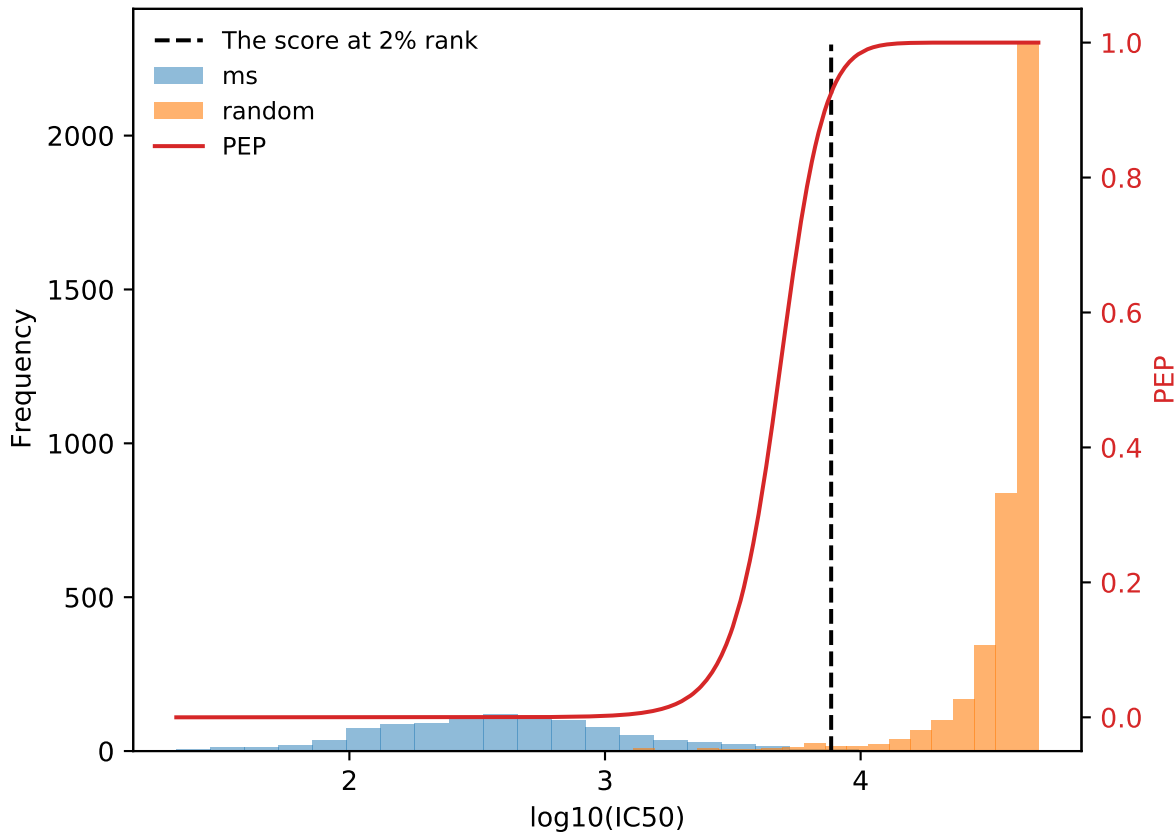

# HLA-B2705

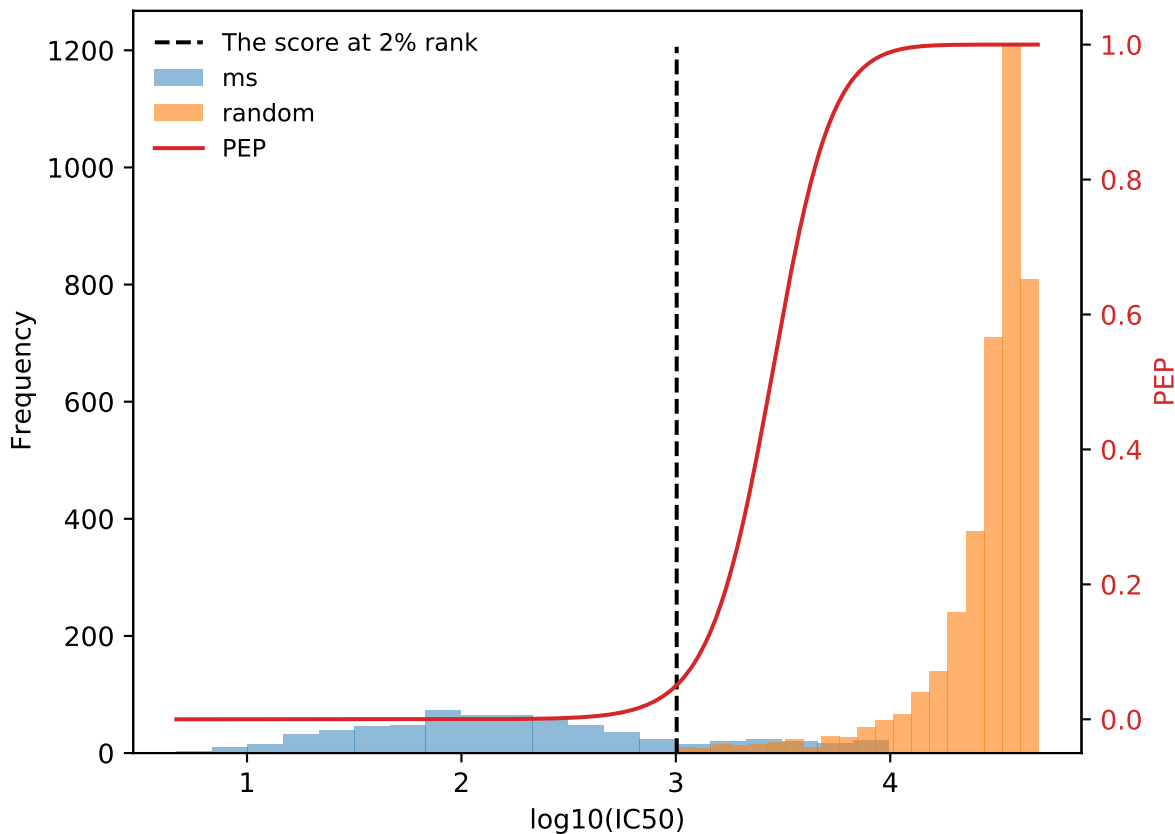

# HLA-B3507

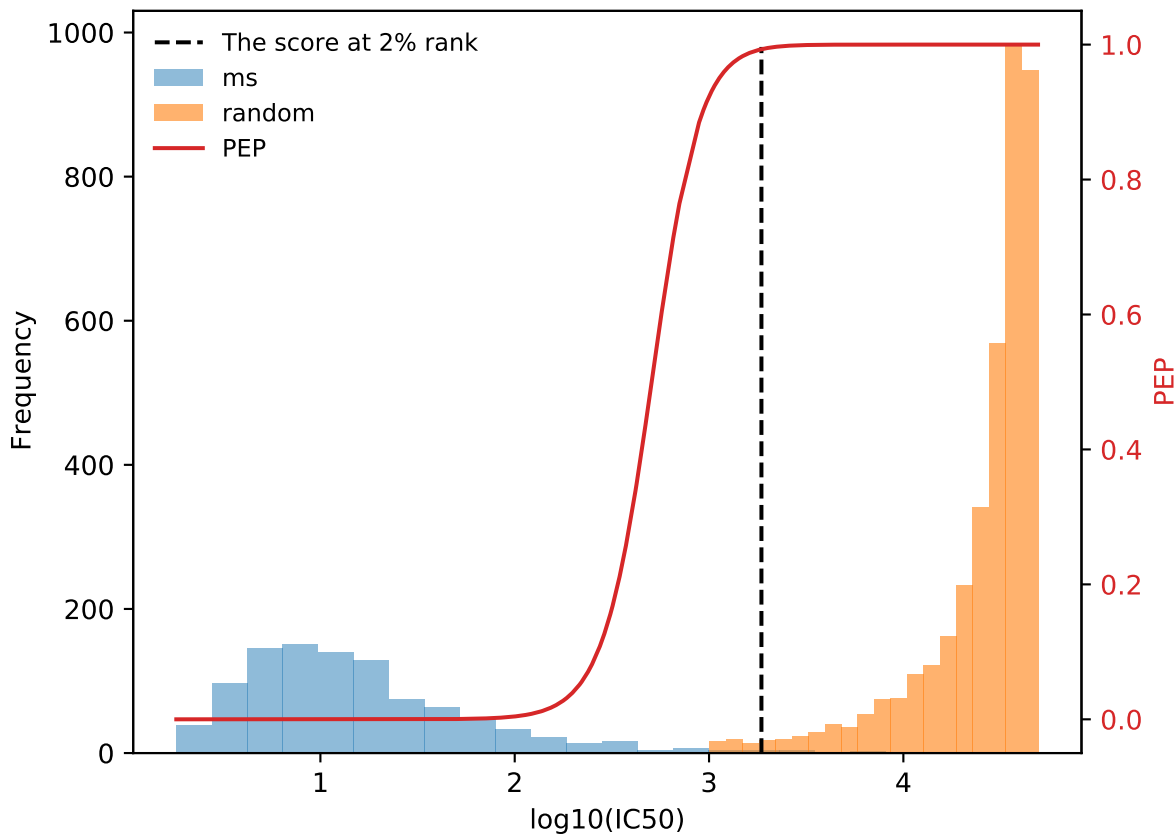

# HLA-B4201

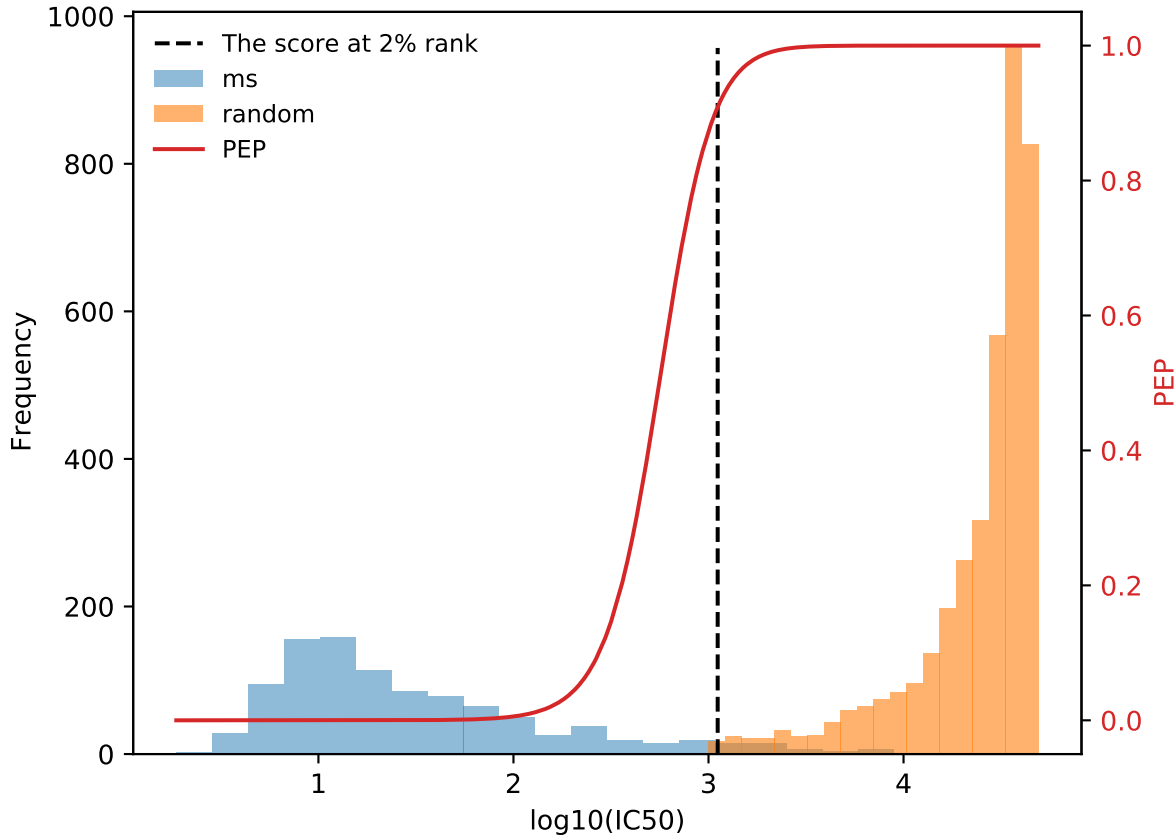

# HLA-C0303

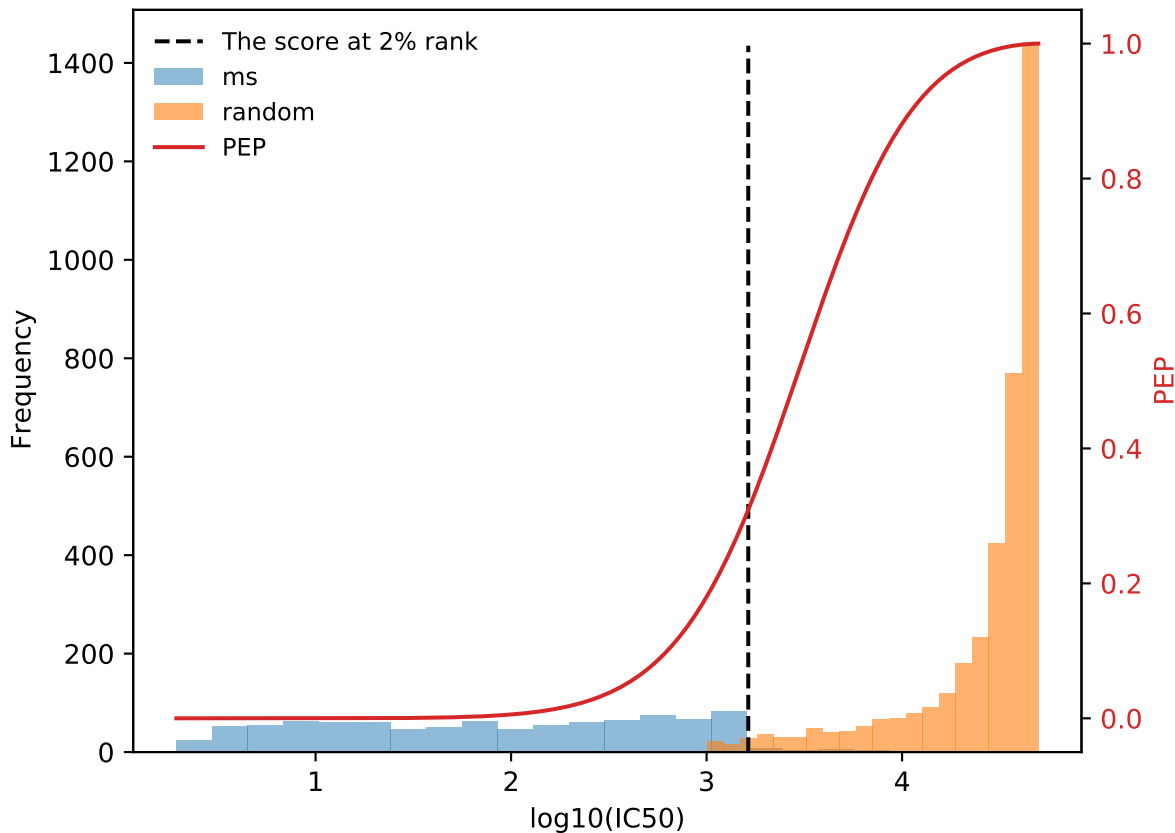

# HLA-C0401

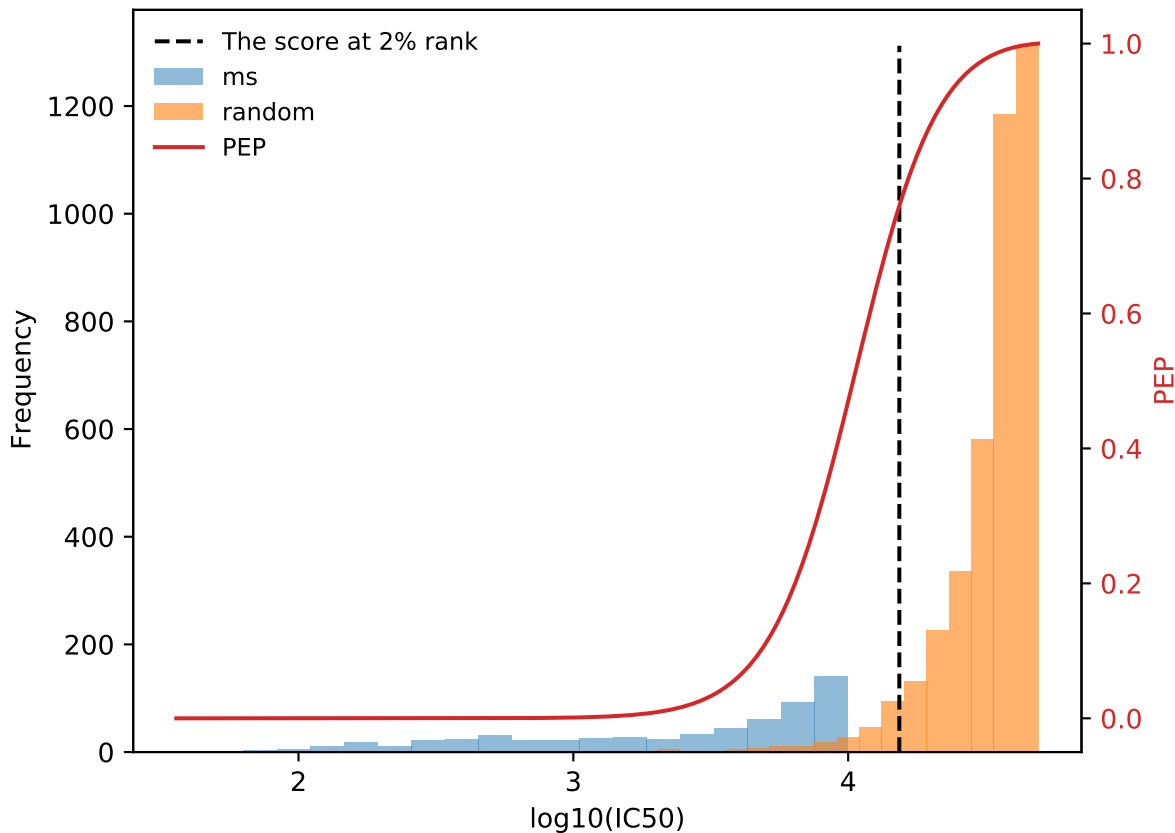

# HLA-C0701

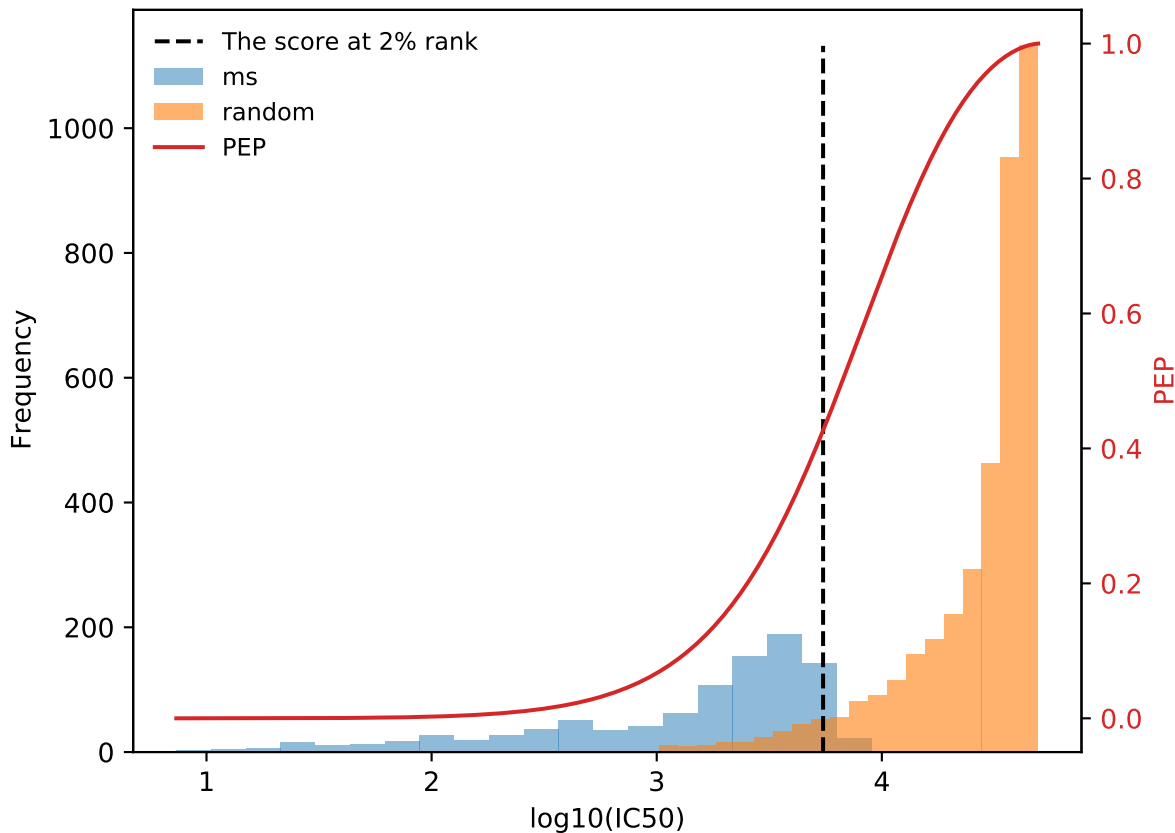

# HLA-C0801

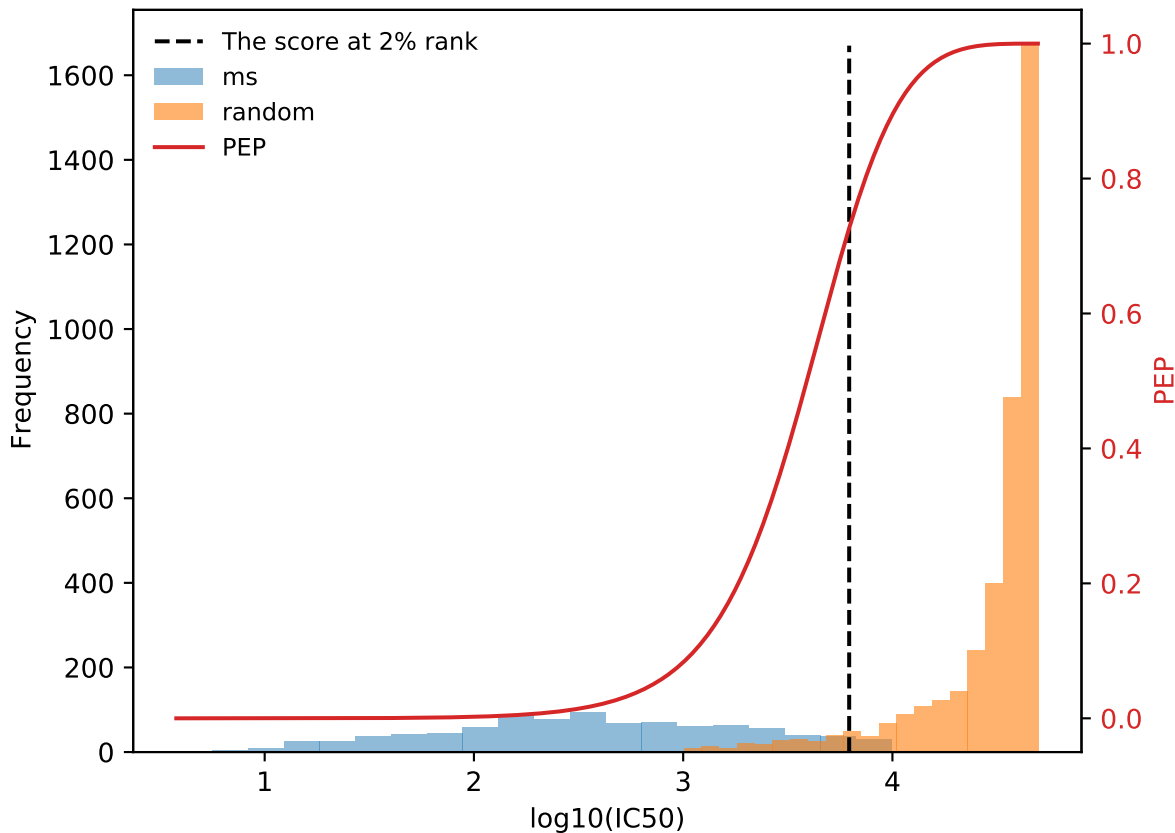

# HLA-C0802

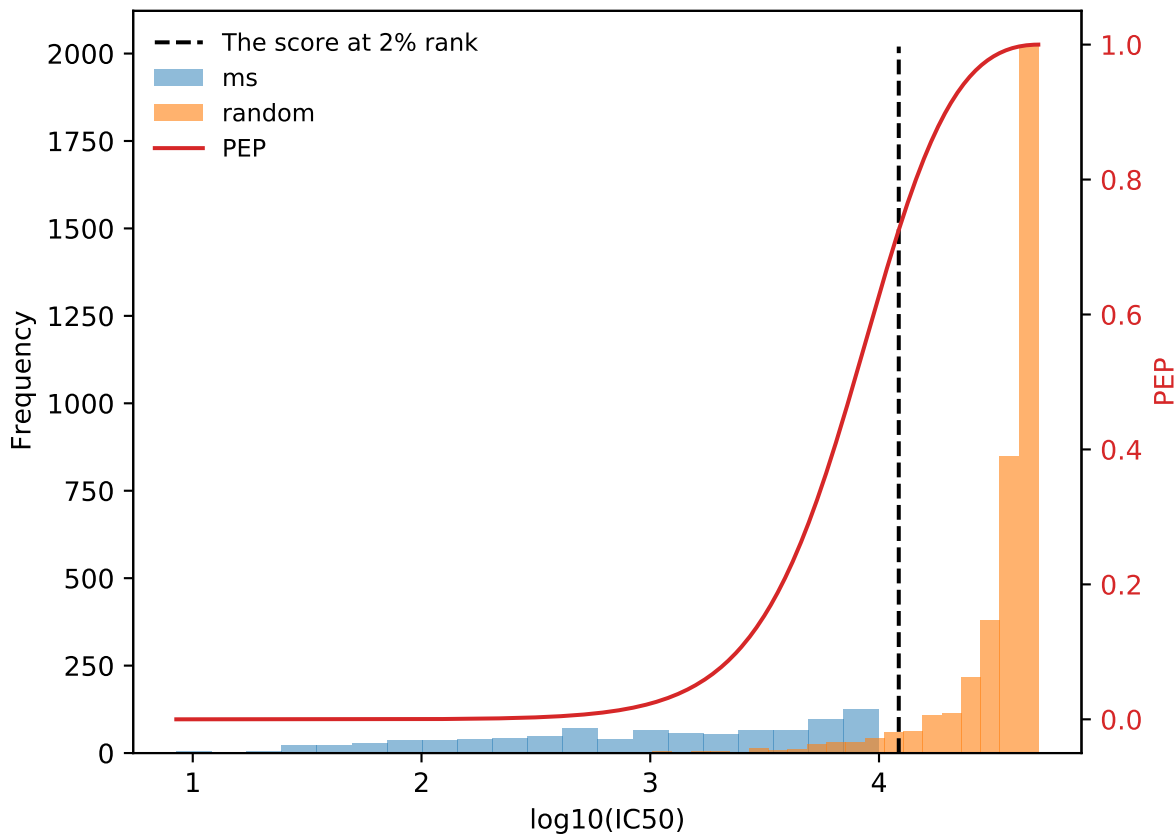

# HLA-C1402

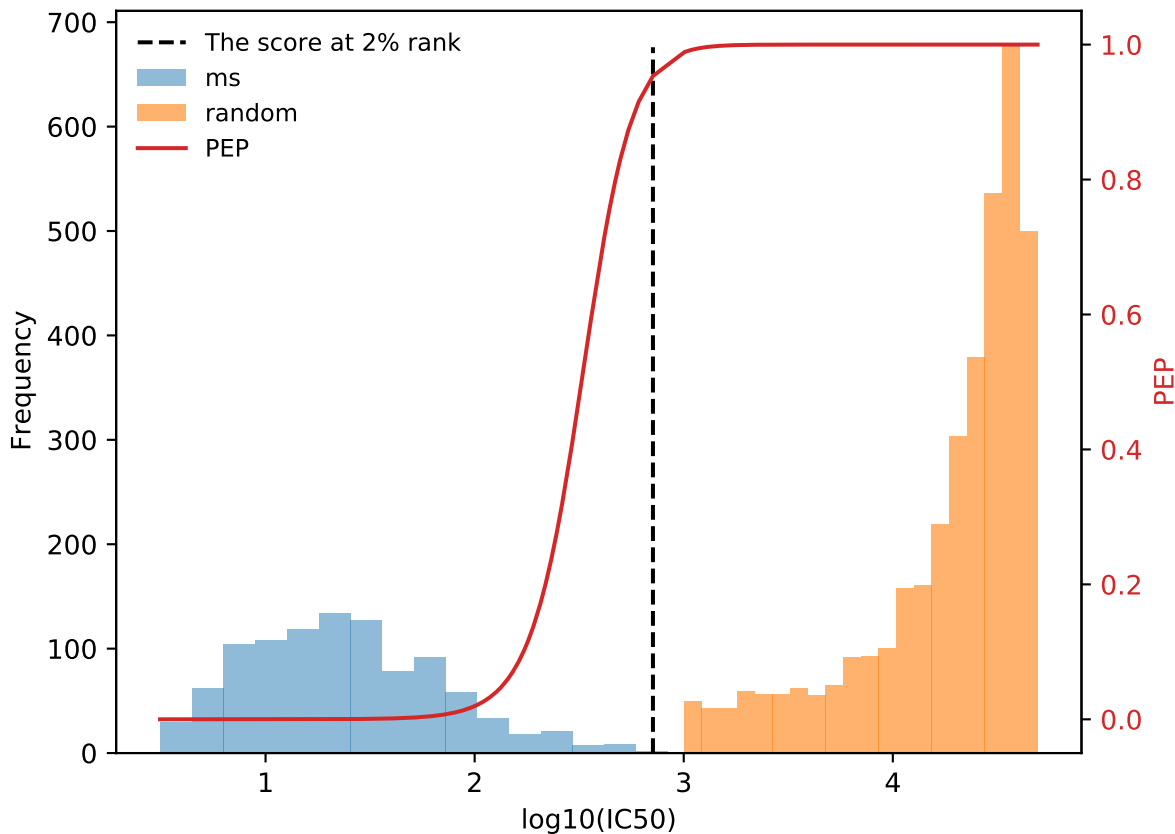

# HLA-C1403

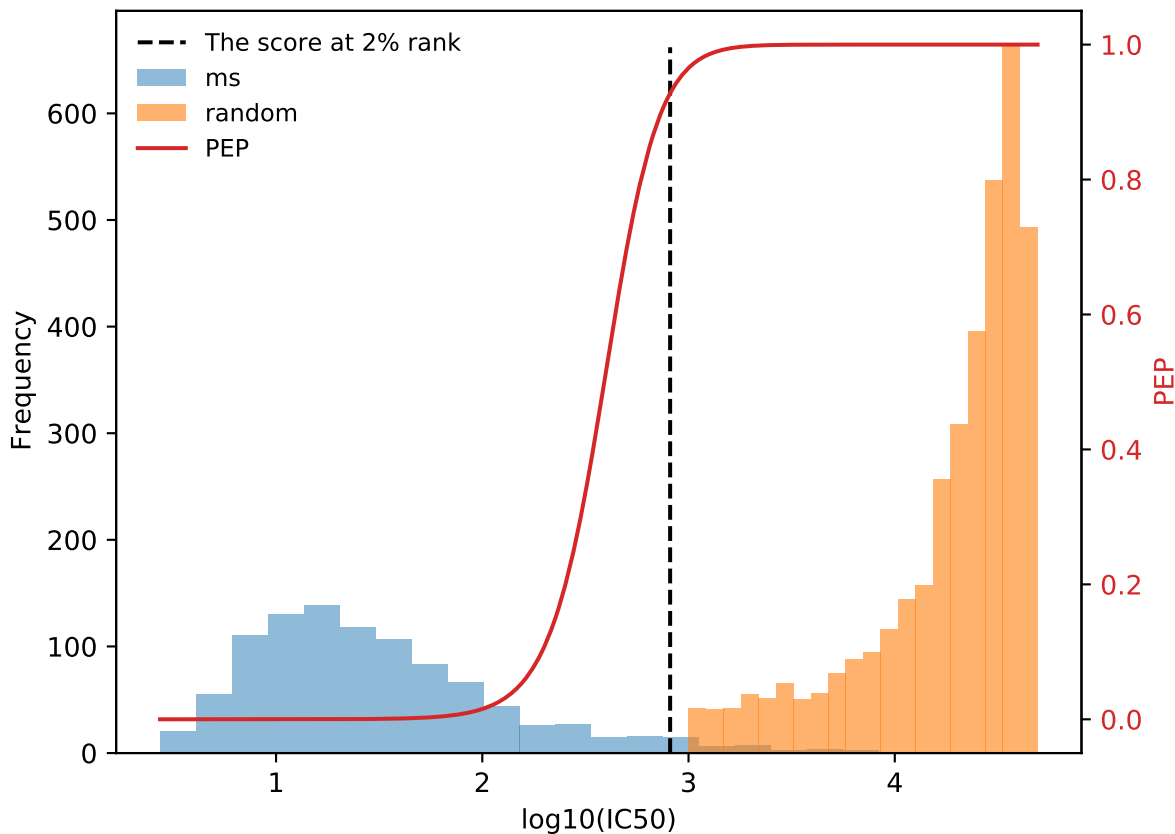

Supplement: btab479_Supplementary_Data [file btab479_supplementary_data.zip › supplementary_data3.pdf]
