# Supplementary material for: MHCVision: estimation of global and local false discovery rate for MHC class I peptide binding prediction
Source: Bioinformatics. 2021 Jul 1;37(21):3830–8. doi: 10.1093/bioinformatics/btab479 (PMC8570816; doi:10.1093/bioinformatics/btab479)
Supplement: btab479_Supplementary_Data [file btab479_supplementary_data.zip]

Archive with 4 entries (4 files):
- supplementary_data1_210622.pdf
- supplementary_data2.pdf
- supplementary_data3.pdf
- Table S1.xlsx
